# Supplementary material for: Towards whole plastome phylogeography: Resolving small genetic distances among European Arnica montana L. with the PlastidPipeline
Source: Research Square preprint supplement (doi:10.21203/rs.3.rs-7219874/v1), 2025-08-01
Supplement: Supplementary file 1 [file e33f2f1916d800c3078c8b62.xlsx]

## Sheet: S2.1 Pipeline run statistics
						Trim Reads		Assembly				Standardization Annotation		Annotation Quality Control		Build Reference Annotation Backmapping		Backmapping				BackmappingQC		Backmapping Genome Coverage		Backmapping Visualization		Annotation Metadata
					CPUs	16		16				1		1		8		8				1		1		1		1
Data_ID	ENA reference	Reads [bp]	Pairs [M]	Filtered [M]	Duplicates [%]	Time elapsed	Memory [KB]	Time elapsed	Memory [KB]	R	w	Time elapsed	Memory [KB]	Time elapsed	Memory [KB]	Time elapsed	Memory [KB]	Time elapsed	Memory [KB]	Reads mapped	Mapped [%]	Time elapsed	Memory [KB]	Time elapsed	Memory [KB]	Time elapsed	Memory [KB]	Time elapsed	Memory [KB]
Aang_FI	ERZ27314920	100	3.82759	3.75372	1.20745	00:00:45	1828772	00:14:32	3641692	24	66	00:00:06	0	00:00:28	123996	00:00:36	66292	00:00:44	135420	268175	7.00637	00:02:46	920612	00:00:18	54936	00:00:37	161332	00:00:12	60864
Agri_AK	ERZ27314921	100	4.45312	4.38756	1.00038	00:00:54	1961676	00:23:12	4167628	30	65	00:00:11	92556	00:00:54	130768	00:00:34	97752	00:00:30	2709016	271769	6.10289	00:01:47	1772656	00:00:20	54944	00:00:07	121176	00:00:12	60484
Ales_AK	ERZ27314922	100	4.2187	4.17629	0.397143	00:00:58	2057192	00:21:35	6255800	30	65	00:00:09	0	00:00:28	124000	00:00:16	77444	00:00:31	135356	127115	3.01313	00:02:09	921228	00:00:17	326180	00:00:57	185560	00:00:12	60864
Amon_AG	ERZ27314914	100	3.36815	3.31723	0.458	00:00:41	1875732	00:18:03	3352848	30	66	00:00:05	0	00:00:54	130768	00:00:14	60024	00:01:27	135368	103988	3.08739	00:01:37	920864	00:00:16	54940	00:01:50	166872	00:00:12	66348
Amon_BB	ERZ27314917	150	675.51	648.561	4.679	01:40:33	7651912	01:01:07	15693292	30	112	00:01:05	89912	00:01:22	130132	00:00:28	66320	08:32:49	179660	68724649	10.1738	08:29:01	984100	00:49:10	54960	00:04:52	167776	00:00:07	0
Amon_BB-d	ERZ27314310	150	36.1656	35.1133	0.237	00:05:44	1951608	02:04:07	10310232	30	90	00:00:07	0	00:00:08	0	00:01:01	198024	00:29:13	176404	129764	0.358805	00:17:52	12049240	00:02:29	54976	00:02:34	142252	00:00:07	0
Amon_BW	ERZ27314918	150	18.2993	17.6922	2.075	00:08:21	2611024	01:51:08	17910156	30	112	00:00:07	0	00:00:07	0	00:00:07	0	00:13:58	5030812	406703	2.22251	00:09:40	7080796	00:01:23	54976	00:23:11	164064	00:00:06	0
Amon_CH	ERZ27314919	150	5.35207	5.35051	0.177	00:01:54	1569560	00:08:55	8678756	11	85	00:04:00	94776	00:00:11	74972	00:24:42	82660	00:00:43	127512	297377	5.5563	00:22:35	921356	00:00:31	54964	00:00:45	162308	00:00:08	0
Amon_CT	ERZ26880185	150	4.7709	4.39476	2.514	00:01:00	2034856	00:41:42	14928024	30	84	00:00:14	82756	00:00:19	103316	00:00:23	66352	00:00:38	142436	151732	3.18037	00:02:29	2488648	00:00:20	61396	00:00:31	307728	00:01:48	126044
Amon_DK	ERZ27314915	150	8.08142	7.56438	2.137	00:01:45	2371548	03:33:07	39848864	27	65	00:00:48	89420	00:01:07	124400	00:01:14	77300	00:01:03	148544	351794	4.35312	00:03:50	917400	00:00:29	54940	00:01:59	162272	00:01:44	126804
Amon_GL	ERZ27321240	150	361.65	354.783	2.294	00:55:47	5167908	01:36:00	17390464	30	112	00:00:08	0	00:00:07	0	00:00:14	165276	05:08:36	178704	19795373	5.47363	03:14:59	967380	00:21:10	62696	00:01:46	171692	00:00:06	0
Amon_GL-71	ERZ27321242	150	189.509	186.211	1.88161	00:28:57	3620524	01:39:19	17380520	30	112	00:00:06	0	00:00:07	0	00:00:05	0	00:37:37	142692	10381908	5.47831	01:36:23	976404	00:09:42	54964	00:01:07	160860	00:00:06	0
Amon_GL-72	ERZ27321243	150	192.199	189.219	2.13489	00:30:06	3694908	01:29:10	16761272	30	112	00:00:05	24	00:00:12	129068	00:00:07	0	02:23:38	179028	10550595	5.48942	01:37:54	975160	00:09:41	62696	00:00:37	274412	00:00:08	0
Amon_GL-73	ERZ27321244	150	190.089	185.109	1.89231	00:27:25	8082604	01:35:33	16493504	30	112	00:00:05	0	00:00:52	113868	00:00:19	53940	02:32:43	183424	10320601	5.42934	02:36:43	975092	00:09:21	54968	00:01:06	162236	00:00:12	66352
Amon_GL-74	ERZ27321245	150	184.839	181.843	2.79076	00:29:10	3877684	01:36:26	17324640	30	112	00:05:17	51144	00:00:08	0	00:32:32	66528	02:35:26	184020	10171592	5.50295	02:07:18	979884	00:09:26	54968	00:01:07	162128	00:00:24	127472
Amon_GL-d	ERZ27321241	150	224.829	220.939	1.88161	00:34:49	3429668	02:22:39	30514060	40	100	00:01:40	89480	00:02:09	126556	00:00:26	91492	00:30:40	138116	388765	0.172916	02:47:58	984784	00:15:55	66472	00:04:54	400236	00:00:31	135388
Amon_GL-Y1	ERZ27321246	150	60.3757	59.1469	2.22255	00:07:51	2482976	01:29:17	16595120	30	112	00:00:13	88312	00:00:52	113872	00:00:14	66424	00:07:31	149876	3312765	5.48692	02:51:16	967240	00:03:12	433740	00:18:17	162840	00:00:12	62004
Amon_GL-Y2	ERZ27321247	150	61.1601	59.9266	2.18685	00:08:17	12279464	01:43:14	16414224	30	112	00:00:05	0	00:00:55	130772	00:09:20	66436	01:48:31	147920	3357055	5.48896	01:08:34	971316	00:03:31	54940	00:00:22	162732	00:00:12	59996
Amon_MV	ERZ27314916	150	22.8622	22.2721	2.948	00:03:55	2301032	02:56:59	63487816	30	85	00:00:59	89360	00:01:13	123264	00:00:11	134300	00:04:26	10237704	2357363	10.3112	00:17:04	939192	00:02:43	76708	00:02:46	163284	00:00:12	114872
Auna_AK	ERZ27314923	100	6.12031	6.06317	0.350404	00:00:51	1984372	00:12:45	10673384	12	85	00:02:30	84608	00:01:49	125396	00:00:08	0	00:00:40	128376	183701	3.0015	00:03:45	972648	00:00:49	59316	00:02:17	164904	00:01:13	125216
Ecan_CT	ERZ27314912	150	3.99071	3.73629	3.10015	00:00:52	2101188	00:20:36	6508228	30	112	00:00:21	76588	00:00:28	124000	00:00:06	0	00:00:35	148280	373521	9.35975	00:02:03	956552	00:01:04	76840	00:01:28	156960	00:00:12	61956
Gtul_MX	ERZ27314913	150	22.3997	21.5489	1.559	00:03:30	2749176	00:52:02	12741484	17	111	00:00:06	0	00:00:08	0	00:00:06	0	00:13:12	141528	1785540	7.97127	00:11:37	939076	00:01:17	54972	00:00:32	376704	00:00:07	0
Vcar_CA	ERZ27314911	150	16.573	15.7177	1.68807	00:03:18	6679936	00:40:43	30048892	30	110	00:01:17	92224	00:02:16	130232	00:00:24	59376	00:02:22	137036	1388038	8.37529	00:09:11	957588	00:01:33	77464	00:03:23	155988	00:01:48	127520
NB: Memory use is usually not recorded for jobs which ran less than 10 seconds.

## Sheet: S2.2 SNPs per region
	Regions with SNPs characteristic for A. montana
	Part	Region	Type	Length*	SNPs	%	Coding**
	LSC	rps16	intron	267	2	0.749064
	LSC	trnQ-UUU	tRNA	72	1	1.38889
	LSC	trnY-GUA-rpoB	spacer	1153	1	0.0867303
	LSC	trnG-UCC-trnR-UCU	spacer	190	1	0.526316
	LSC	psbD	exon	1511	1	0.0661813
	LSC	trnV-UAC	intron	576	1	0.173611
	LSC	rbcL	exon	1458	1	0.0685871	Glu > Lys
	IR	trnI-GAU	intron	781	1	0.128041
	SSC	ndhD	exon	1503	1	0.0665336
	SSC	ccsA	exon	969	1	0.103199	His > Asn
	SSC	ndhF	exon	2226	2	0.0898473
	Regions with SNPs within A. montana
	Part	Region	Type	Length*	SNPs	%	Coding***
	LSC	psbA	exon	1062	1	0.094162
	LSC	matK	exon / trnK intron	1515	4	0.264026
	LSC	trnK	intron, 5' of matK	741	1	0.134953
	LSC	psbK-psbI	spacer	408	2	0.490196
	LSC	trnS-GCU-trnC-GCA	spacer	755	3	0.397351
	LSC	rpoB	exon	3183	1	0.0314169	Lys>Gln
	LSC	rpoC1	intron	736	1	0.13587
	LSC	rpoC2	exon	4134	3	0.0725689	Thr>Pro, Glu>Asp
	LSC	rps2-atpI	spacer	214	1	0.46729
	LSC	atpI-atpH	spacer	1171	2	0.170794
	LSC	trnG-UCC	intron	728	1	0.137363
	LSC	trnT-GGU-psbD	spacer	1194	1	0.0837521
	LSC	rps14-trnfM-CAU	spacer	154	1	0.649351
	LSC	rps14	exon	303	1	0.330033
	LSC	pafI	intron 2	746	1	0.134048
	LSC	pafI-trnS-GGA	spacer	902	2	0.221729
	LSC	trnS-GGA-rps4	spacer	305	1	0.327869
	LSC	trnT-UGU	exon	73	1	1.36986
	LSC	trnT-UGU-trnL-UAA	spacer	561	1	0.178253
	LSC	trnL-UAA	intron	438	1	0.228311
	LSC	trnL-UAA-trnF-GAA	spacer	419	1	0.238663
	LSC	ndhC-ndhK	spacer	51	2	3.92157
	LSC	atpB	exon	1467	1	0.0681663	Lys>Asn in Amon_CT
	LSC	atpB-rbcL	spacer	751	3	0.399467
	LSC	rbcL	exon	1458	1	0.0685871	Glu>Gln
	LSC	rbcL-accD	spacer	538	2	0.371747
	LSC	accD-psaI	spacer	697	1	0.143472
	LSC	psaI-pafII	spacer	391	1	0.255754
	LSC	pafII-cemA	spacer	828	2, adjacent	0.241546
	LSC	petA-psbI	spacer	801	1	0.124844
	LSC	rps18-rpl20	spacer	248	1	0.403226
	LSC	psbB-psbT	spacer	188	1	0.531915
	LSC	petB	intron	772	2	0.259067
	LSC	rpoA	exon	1008	1	0.0992063
	LSC	rps11	exon	411	1	0.243309	Phe>Ile
	LSC	infA	exon	234	1	0.42735
	LSC	rpl14	exon	369	1	0.271003
	LSC	rpl22	exon	465	2	0.430108	Ile>Met in Amon_DK, Met>Ile
	IR	rrn16	rRNA	1491	1	0.0670691
	IR	trnA-UGC	intron	821	1	0.121803
	IR + SSC	ycf1	exon	5073	8	0.157698	Phe>Leu, Asn>Lys, Lys>Asn in Amon_BW, Glu>Asp, Gly>Glu in Amon_GL
	SSC	ycf1-rps15	spacer	393	1	0.254453
	SSC	ndhA	intron	1061	4	0.377003
	SSC	ndhA	exon 2	539	1	0.185529
	SSC	ndhI	exon	501	1	0.199601
	SSC	ndhI-ndhG	spacer	352	4	1.13636
	SSC	psaC-ndhD	spacer	116	1	0.862069
	SSC	ndhD	exon	1503	1	0.0665336
	SSC	ccsA	exon	969	1	0.103199	Tyr>Ser
	SSC	rpl32-trnL-UAG	spacer	742	3	0.404313
	SSC	rpl32-ndhF	spacer	991	2	0.201816
	SSC	ndhF	exon	2226	2	0.0898473	Gln>Lys in Amon_CT
		* in Amon_BB
		** derived in A. montana
		*** derived in CN Europe A. montana, unless specified

## Sheet: S2.3 Intraspecific SNPs
Track Name	Name	Minimum	Maximum	Length	Polymorphism Type	Major	Minor	Group-specific	Region	Type	TransitionTransversion	Internal Polymorphism	GroupInternal	CodingChange	Site
Intraspecific Variants	G/T	1280	1280	1	SNP	6	2	1	psbA	exon	I	1	2	0	Amon_GL-Y1:1269, Amon_GL-Y2:1269
Intraspecific Variants	T/G	2631	2631	1	SNP	6	2	1	matK	exon	I	0	1	0
Intraspecific Variants	G/T	2663	2663	1	SNP	7	1	0	matK	exon	I	1	1	0	Amon_CT:2652
Intraspecific Variants	A/T	3236	3236	1	SNP	6	2	1	matK	exon	V	0	1	0
Intraspecific Variants	A/G	3738	3738	1	SNP	6	2	1	matK	exon	V	0	1	0
Intraspecific Variants	C/T	3943	3943	1	SNP	6	2	1	trnK	intron	V	0	1	0
Intraspecific Variants	G/T	7890	7890	1	SNP	7	1	0	psbK-psbI	spacer	I	0	0	0
Intraspecific Variants	C/A	8146	8146	1	SNP	6	2	1	psbK-psbI	spacer	I	0	1	0
Intraspecific Variants	G/T	8967	8967	1	SNP	7	1	0	trnS-GCU-trnC-GCA	spacer	I	0	0	0
Intraspecific Variants	A/C	9247	9247	1	SNP	6	2	1	trnS-GCU-trnC-GCA	spacer	I	0	1	0
Intraspecific Variants	A/T	9338	9338	1	SNP	6	2	1	trnS-GCU-trnC-GCA	spacer	V	0	1	0
Intraspecific Variants	C/A	14376	14376	1	SNP	6	2	1	rpoB	exon	I	1	2	Lys>Gln	Amon_AG:14359, Amon_BB-d:14359, Amon_BW:14363
Intraspecific Variants	G/T	16930	16930	1	SNP	5	3	0	rpoC1	intron	I	0	0	0
Intraspecific Variants	C/A	21377	21377	1	SNP	6	2	1	rpoC2	exon	I	0	1	Thr>Pro
Intraspecific Variants	T/C	21664	21664	1	SNP	6	2	1	rpoC2	exon	V	1	2	0	Amon_BB-d:21619, Amon_BW:21623
Intraspecific Variants	C/G	21715	21715	1	SNP	6	2	1	rpoC2	exon	V	1	2	Glu>Asp	Amon_GL-Y1:21679
Intraspecific Variants	G/T	24415	24415	1	SNP	6	2	1	rps2-atpI	spacer	I	0	1	0
Intraspecific Variants	T/C	26066	26066	1	SNP	6	2	1	atpI-atpH	spacer	V	1	2	0	Amon_BW:26024
Intraspecific Variants	G/T	26195	26195	1	SNP	7	1	0	atpI-atpH	spacer	I	1	1	0	Amon_CT:26137
Intraspecific Variants	A/G	30870	30870	1	SNP	5	3	0	trnG-UCC	intron	V	1	1	0	Amon_DK:30819, Amon_MV:30820, Amon_BW:30824
Intraspecific Variants	T/C	31819	31819	1	SNP	6	2	1	trnT-GGU-psbD	spacer	V	0	1	0
Intraspecific Variants	T/C	36530	36530	1	SNP	6	2	1	rps14-trnfM-CAU	spacer	V	0	1	0
Intraspecific Variants	A/C	36648	36648	1	SNP	6	2	1	rps14	exon	I	1	2	0	Amon_CT:36559, Amon_GL-Y1:36564, Amon_GL-Y2:36564
Intraspecific Variants	G/A	43152	43152	1	SNP	7	1	0	pafI	intron 2	V	0	0	0
Intraspecific Variants	A/T	44336	44336	1	SNP	6	2	1	pafI-trnS-GGA	spacer	V	0	1	0
Intraspecific Variants	A/T	44373	44373	1	SNP	6	2	1	pafI-trnS-GGA	spacer	V	0	1	0
Intraspecific Variants	G/A	45442	45442	1	SNP	6	2	1	trnS-GGA-rps4	spacer	V	1	2	0	Amon_CT:45351
Intraspecific Variants	A/G	46471	46471	1	SNP	6	2	1	trnT-UGU	tRNA	V	1	2	0	Amon_BB-d:46418
Intraspecific Variants	A/T	46675	46675	1	SNP	6	2	1	trnT-UGU-trnL-UAA	spacer	V	0	1	0
Intraspecific Variants	G/C	47329	47329	1	SNP	6	2	1	trnL-UAA	intron	V	1	2	0	Amon_GL-Y1:47243, Amon_GL-Y2:47243
Intraspecific Variants	C/A	47864	47864	1	SNP	6	2	1	trnL-UAA-trnF-GAA	spacer	I	1	2	0	Amon_GL-Y1:47778, Amon_GL-Y2:47778
Intraspecific Variants	T/A	49620	49620	1	SNP	6	2	0	ndhC-ndhK	spacer	V	1	1	0	Amon_DK:49566
Intraspecific Variants	A/G	49659	49659	1	SNP	6	2	1	ndhC-ndhK	spacer	V	1	2	0	Amon_DK:49605, Amon_BB-d:49605, Amon_BW:49609
Intraspecific Variants	C/G	54074	54074	1	SNP	7	1	0	atpB	exon	V	0	0	Lys>Asn
Intraspecific Variants	G/A	54240	54240	1	SNP	7	1	0	atpB-rbcL	spacer	V	1	1	0	Amon_GL-Y1:54134, Amon_GL-Y2:54134
Intraspecific Variants	G/C	54555	54555	1	SNP	6	2	1	atpB-rbcL	spacer	V	1	2	0	Amon_BB-d:54500, Amon_BW:54505, Amon_CH:54499
Intraspecific Variants	T/C	54678	54678	1	SNP	6	2	1	atpB-rbcL	spacer	V	1	2	0	Amon_MV:54623, Amon_BW:54626
Intraspecific Variants	C/G	56291	56291	1	SNP	6	2	1	rbcL	exon	V	0	1	Glu>Gln
Intraspecific Variants	C/A	56626	56626	1	SNP	6	2	1	rbcL-accD	spacer	I	0	1	0
Intraspecific Variants	C/A	56819	56819	1	SNP	6	2	1	rbcL-accD	spacer	I	1	2	0	Amon_GL-Y1:56712, Amon_GL-Y2:56712
Intraspecific Variants	C/A	59119	59119	1	SNP	6	2	1	accD-psaI	spacer	I	1	2	0	Amon_GL-Y1:59012
Intraspecific Variants	C/T	59352	59352	1	SNP	7	1	0	psaI-pafII	spacer	V	1	1	0	Amon_GL-Y1:59245, Amon_GL-Y2:59245
Intraspecific Variants	T/G	61025	61025	1	SNP	6	2	1	pafII-cemA	spacer	I	1	2	0	Amon_DK:60957, Amon_BW:60961
Intraspecific Variants	C/T	61026	61026	1	SNP	6	2	1	pafII-cemA	spacer	V	1	2	0	Amon_DK:60958, Amon_BW:60962
Intraspecific Variants	C/A	62930	62930	1	SNP	7	1	0	petA-psbI	spacer	I	1	1	0	Amon_CT:62816
Intraspecific Variants	C/A	68235	68235	1	SNP	7	1	0	rps18-rpl20	spacer	I	0	0	0
Intraspecific Variants	T/C	73790	73790	1	SNP	6	2	1	psbB-psbT	spacer	V	1	2	0	Amon_GL-Y2:73632
Intraspecific Variants	C/A	74814	74814	1	SNP	7	1	0	petB	intron	I	1	1	0	Amon_GL-Y2:74654
Intraspecific Variants	T/A	75216	75216	1	SNP	6	2	1	petB	intron	V	0	1	0
Intraspecific Variants	A/G	78004	78004	1	SNP	6	2	1	rpoA	exon	V	1	2	0	Amon_MV:77932, Amon_BW:77936
Intraspecific Variants	T/A	79181	79181	1	SNP	6	2	1	rps11	exon	V	1	2	Phe>Ile	Amon_GL-Y1:79021, Amon_GL-Y2:79021
Intraspecific Variants	C/T	79783	79783	1	SNP	6	2	1	infA	exon	V	1	2	0	Amon_DK:79704, Amon_MV:79705, Amon_BB-d:79709, Amon_BW:79709, Amon_CH:79702
Intraspecific Variants	G/T	80818	80818	1	SNP	6	2	1	rpl14	exon	I	1	2	0	Amon_GL-Y1:80652, Amon_GL-Y2:80652 -A!- Amon_AG:80738, Amon_BB-d:80744, Amon_BW:80744
Intraspecific Variants	T/C	83373	83373	1	SNP	7	1	0	rpl22	exon	V	1	1	Ile>Met	Amon_DK:83294
Intraspecific Variants	A/C	83559	83559	1	SNP	6	2	1	rpl22	exon	I	1	2	Met>Ile	Amon_AG:83479, Amon_DK:83480, Amon_BW:83485
Intraspecific Variants	T/C	101342	101342	1	SNP	6	2	1	(IR) rrn16	rRNA	V	0	1	0
Intraspecific Variants	C/T	103166	103166	1	SNP	7	1	0	(IR) trnA-UGC	intron	V	0	0	0
Intraspecific Variants	A/C	108870	108870	1	SNP	6	2	1	(IR) ycf1	exon	I	1	2	Phe>Leu	Amon_GL-Y1:108704, Amon_GL-Y2:108704
Intraspecific Variants	A/C	109365	109365	1	SNP	7	1	0	ycf1	exon	I	0	0	0
Intraspecific Variants	G/T	109509	109509	1	SNP	6	2	1	ycf1	exon	I	0	1	Asn>Lys
Intraspecific Variants	G/T	109674	109674	1	SNP	7	1	0	ycf1	exon	I	1	1	Lys>Asn	Amon_BW:109600
Intraspecific Variants	T/G	111963	111963	1	SNP	6	2	1	ycf1	exon	I	0	1	Glu>Asp
Intraspecific Variants	C/A	112326	112326	1	SNP	6	2	1	ycf1	exon	I	1	2	0	Amon_GL-Y2:112154
Intraspecific Variants	G/A	112922	112922	1	SNP	7	1	0	ycf1	exon	V	1	1	Gly>Glu	Amon_GL-Y1:112750, Amon_GL-Y2:112750
Intraspecific Variants	A/G	113085	113085	1	SNP	6	2	1	ycf1	exon	V	1	2	0	Amon_AG:113005, Amon_DK:113006, Amon_MV:113007, Amon_BB-d:113011, Amon_BW:113011
Intraspecific Variants	G/T	113466	113466	1	SNP	7	1	0	ycf1-rps15	spacer	I	0	0	0
Intraspecific Variants	T/A	116102	116102	1	SNP	6	2	1	ndhA	intron	V	0	1	0
Intraspecific Variants	T/G	116510	116510	1	SNP	6	2	1	ndhA	intron	I	0	1	0
Intraspecific Variants	G/A	116553	116553	1	SNP	7	1	0	ndhA	intron	V	0	0	0
Intraspecific Variants	T/A	116704	116704	1	SNP	5	3	0	ndhA	intron	V	0	0	0
Intraspecific Variants	C/T	117418	117418	1	SNP	6	2	1	ndhA	exon 2	V	1	2	0	Amon_AG:117338, Amon_MV:117340, Amon_BW:117344, Amon_CH:117337
Intraspecific Variants	C/T	118052	118052	1	SNP	6	2	1	ndhI	exon	V	1	2	0	Amon_MV:117974, Amon_BW:117978
Intraspecific Variants	A/C	118198	118198	1	SNP	6	2	1	ndhI-ndhG	spacer	I	1	2	0	Amon_MV:118120, Amon_BW:118124
Intraspecific Variants	T/G	118220	118220	1	SNP	6	2	1	ndhI-ndhG	spacer	I	1	2	0	Amon_BW:118146
Intraspecific Variants	A/C	118284	118284	1	SNP	6	2	1	ndhI-ndhG	spacer	I	1	2	0	Amon_MV:118206, Amon_BW:118210
Intraspecific Variants	G/T	118305	118305	1	SNP	6	2	1	ndhI-ndhG	spacer	I	1	2	0	Amon_GL-Y1:118133, Amon_GL-Y2:118133
Intraspecific Variants	C/A	120025	120025	1	SNP	6	2	1	psaC-ndhD	spacer	I	1	2	0	Amon_GL-Y2:119853
Intraspecific Variants	A/G	120254	120254	1	SNP	6	2	1	ndhD	exon	V	1	2	0	Amon_DK:120175 -!- Amon_GL-Y1:120082, Amon_GL-Y2:120082
Intraspecific Variants	G/T	121849	121849	1	SNP	6	2	1	ccsA	exon	I	1	2	Tyr>Ser	Amon_GL-Y2:121677
Intraspecific Variants	G/T	123602	123602	1	SNP	6	2	1	rpl32-trnL-UAG	spacer	I	0	1	0
Intraspecific Variants	T/G	123666	123666	1	SNP	6	2	0	rpl32-trnL-UAG	spacer	I	0	0	0
Intraspecific Variants	T/G	123774	123774	1	SNP	6	2	1	rpl32-trnL-UAG	spacer	I	0	1	0
Intraspecific Variants	G/T	124119	124119	1	SNP	6	2	1	rpl32-ndhF	spacer	I	0	1	0
Intraspecific Variants	A/C	124716	124716	1	SNP	6	2	1	rpl32-ndhF	spacer	I	1	2	0	Amon_BB-d:124613
Intraspecific Variants	C/T	125979	125979	1	SNP	6	2	1	ndhF	exon	V	0	1	0
Intraspecific Variants	C/A	126331	126331	1	SNP	7	1	0	ndhF	exon	I	1	1	Gln>Lys	Amon_CT:126147

## Sheet: S2.4 Internal Polymorphism
Track Name	Name	Minimum	Maximum	Length	Coverage	Polymorphism Type	Variant Frequency	Variant Count	Amon Count	Region	Type	TransItionTransVersion	Internal Polymorphism	GroupInternal	CodingChange	Site
Intraspecific Variants	G/T	1280	1280	1		SNP			6	psbA	exon	I	1	1	0	Amon_GL-Y1:1269, Amon_GL-Y2:1269
Variants: Amon_GL-Y2.backmapping.sorted - Amon_GL-Y2	G	1269	1269	1	3452	SNP (transversion)	0.023	78
Variants: Amon_GL-Y1.backmapping.sorted - Amon_GL-Y1	G	1269	1269	1	3482	SNP (transversion)	0.021	72
Intraspecific Variants	G/T	2663	2663	1		SNP			7	matK	exon	I	1	1	0	Amon_CT:2652
Variants: Amon_CT.backmapping.sorted - Amon_CT	G	2652	2652	1	162	SNP (transversion)	0.025	4
Intraspecific Variants	C/A	14376	14376	1		SNP			6	rpoB	exon	I	1	1	Lys>Gln	Amon_AG:14359, Amon_BB-d:14359, Amon_BW:14363
Variants: Amon_AG.backmapping.sorted - Amon_AG	A	14359	14359	1	85	SNP (transversion)	0.071	6
Variants: Amon_BB-d.backmapping.sorted - Amon_BB-d	A	14359	14359	1	110	SNP (transversion)	0.245	27
Variants: Amon_BW.backmapping.sorted - Amon_BW	A	14363	14363	1	291	SNP (transversion)	0.031	9
Intraspecific Variants	T/C	21664	21664	1		SNP			6	rpoC2	exon	V	1	1	0	Amon_BB-d:21619, Amon_BW:21623
Variants: Amon_BB-d.backmapping.sorted - Amon_BB-d	C	21619	21619	1	144	SNP (transition)	0.132	19
Variants: Amon_BW.backmapping.sorted - Amon_BW	C	21623	21623	1	221	SNP (transition)	0.05	11
Intraspecific Variants	C/G	21715	21715	1		SNP			6	rpoC2	exon	V	1	1	Glu>Asp	Amon_GL-Y1:21679
Variants: Amon_GL-Y1.backmapping.sorted - Amon_GL-Y1	C	21679	21679	1	3188	SNP (transversion)	0.01	32
Intraspecific Variants	T/C	26066	26066	1		SNP			6	atpI-atpH	spacer	V	1	1	0	Amon_BW:26024
Variants: Amon_BW.backmapping.sorted - Amon_BW	C	26024	26024	1	437	SNP (transition)	0.027	12
Intraspecific Variants	G/T	26195	26195	1		SNP			7	atpI-atpH	spacer	I	1	1	0	Amon_CT:26137
Variants: Amon_CT.backmapping.sorted - Amon_CT	G	26137	26137	1	133	SNP (transversion)	0.038	5
Intraspecific Variants	A/G	30870	30870	1		SNP			5	trnG-UCC	intron	V	1	1	0	Amon_DK:30819, Amon_MV:30820, Amon_BW:30824
Variants: Amon_DK.backmapping.sorted - Amon_DK	G	30819	30819	1	274	SNP (transition)	0.026	7
Variants: Amon_MV.backmapping.sorted - Amon_MV	G	30820	30820	1	2444	SNP (transition)	0.012	30
Variants: Amon_BW.backmapping.sorted - Amon_BW	G	30824	30824	1	220	SNP (transition)	0.041	9
Intraspecific Variants	A/C	36648	36648	1		SNP			6	rps14	exon	I	1	1	0	Amon_CT:36559, Amon_GL-Y1:36564, Amon_GL-Y2:36564
Variants: Amon_CT.backmapping.sorted - Amon_CT	A	36559	36559	1	145	SNP (transversion)	0.069	10
Variants: Amon_GL-Y1.backmapping.sorted - Amon_GL-Y1	A	36564	36564	1	3042	SNP (transversion)	0.02	62
Variants: Amon_GL-Y2.backmapping.sorted - Amon_GL-Y2	A	36564	36564	1	3063	SNP (transversion)	0.017	53
Intraspecific Variants	G/A	45442	45442	1		SNP			6	trnS-GGA-rps4	spacer	V	1	1	0	Amon_CT:45351
Variants: Amon_CT.backmapping.sorted - Amon_CT	G	45351	45351	1	156	SNP (transition)	0.038	6
Intraspecific Variants	A/G	46471	46471	1		SNP			6	trnT-UGU	tRNA	V	1	1	0	Amon_BB-d:46418
Variants: Amon_BB-d.backmapping.sorted - Amon_BB-d	G	46418	46418	1	118	SNP (transition)	0.144	17
Intraspecific Variants	G/C	47329	47329	1		SNP			6	trnL-UAA	intron	V	1	1	0	Amon_GL-Y1:47243, Amon_GL-Y2:47243
Variants: Amon_GL-Y1.backmapping.sorted - Amon_GL-Y1	G	47243	47243	1	3542	SNP (transversion)	0.012	41
Variants: Amon_GL-Y2.backmapping.sorted - Amon_GL-Y2	G	47243	47243	1	3513	SNP (transversion)	0.015	51
Intraspecific Variants	C/A	47864	47864	1		SNP			6	trnL-UAA-trnF-GAA	spacer	I	1	1	0	Amon_GL-Y1:47778, Amon_GL-Y2:47778
Variants: Amon_GL-Y1.backmapping.sorted - Amon_GL-Y1	C	47778	47778	1	3303	SNP (transversion)	0.012	38
Variants: Amon_GL-Y2.backmapping.sorted - Amon_GL-Y2	C	47778	47778	1	3266	SNP (transversion)	0.013	43
Intraspecific Variants	T/A	49620	49620	1		SNP			6	ndhC-ndhK	spacer	V	1	1	0	Amon_DK:49566
Variants: Amon_DK.backmapping.sorted - Amon_DK	T	49566	49566	1	211	SNP (transversion)	0.043	9
Intraspecific Variants	A/G	49659	49659	1		SNP			6	ndhC-ndhK	spacer	V	1	1	0	Amon_DK:49605, Amon_BB-d:49605, Amon_BW:49609
Variants: Amon_DK.backmapping.sorted - Amon_DK	G	49605	49605	1	235	SNP (transition)	0.03	7
Variants: Amon_BB-d.backmapping.sorted - Amon_BB-d	G	49605	49605	1	123	SNP (transition)	0.13	16
Variants: Amon_BW.backmapping.sorted - Amon_BW	G	49609	49609	1	204	SNP (transition)	0.054	11
Intraspecific Variants	G/A	54240	54240	1		SNP			7	atpB-rbcL	spacer	V	1	1	0	Amon_GL-Y1:54134, Amon_GL-Y2:54134
Variants: Amon_GL-Y1.backmapping.sorted - Amon_GL-Y1	G	54134	54134	1	3304	SNP (transition)	0.015	48
Variants: Amon_GL-Y2.backmapping.sorted - Amon_GL-Y2	G	54134	54134	1	3368	SNP (transition)	0.012	40
Intraspecific Variants	G/C	54555	54555	1		SNP			6	atpB-rbcL	spacer	V	1	1	0	Amon_BB-d:54500, Amon_BW:54505, Amon_CH:54499
Variants: Amon_BB-d.backmapping.sorted - Amon_BB-d	C	54500	54500	1	140	SNP (transversion)	0.057	8
Variants: Amon_BW.backmapping.sorted - Amon_BW	C	54505	54505	1	331	SNP (transversion)	0.027	9
Variants: Amon_CH.backmapping.sorted - Amon_CH	C	54499	54499	1	225	SNP (transversion)	0.027	6
Intraspecific Variants	T/C	54678	54678	1		SNP			6	atpB-rbcL	spacer	V	1	1	0	Amon_MV:54623, Amon_BW:54626
Variants: Amon_MV.backmapping.sorted - Amon_MV	C	54623	54623	1	2430	SNP (transition)	0.011	26
Variants: Amon_BW.backmapping.sorted - Amon_BW	C	54626	54626	1	303	SNP (transition)	0.04	12
Intraspecific Variants	C/A	56819	56819	1		SNP			6	rbcL-accD	spacer	I	1	1	0	Amon_GL-Y1:56712, Amon_GL-Y2:56712
Variants: Amon_GL-Y1.backmapping.sorted - Amon_GL-Y1	C	56712	56712	1	3390	SNP (transversion)	0.01	34
Variants: Amon_GL-Y2.backmapping.sorted - Amon_GL-Y2	C	56712	56712	1	3408	SNP (transversion)	0.013	45
Intraspecific Variants	C/A	59119	59119	1		SNP			6	accD-psaI	spacer	I	1	1	0	Amon_GL-Y1:59012
Variants: Amon_GL-Y1.backmapping.sorted - Amon_GL-Y1	C	59012	59012	1	3381	SNP (transversion)	0.012	41
Intraspecific Variants	C/T	59352	59352	1		SNP			7	psaI-pafII	spacer	V	1	1	0	Amon_GL-Y1:59245, Amon_GL-Y2:59245
Variants: Amon_GL-Y1.backmapping.sorted - Amon_GL-Y1	C	59245	59245	1	3541	SNP (transition)	0.012	44
Variants: Amon_GL-Y2.backmapping.sorted - Amon_GL-Y2	C	59245	59245	1	3430	SNP (transition)	0.015	52
Intraspecific Variants	T/G	61025	61025	1		SNP			6	pafII-cemA	spacer	I	1	1	0	Amon_DK:60957, Amon_BW:60961
Intraspecific Variants	C/T	61026	61026	1		SNP			6	pafII-cemA	spacer	V	1	1	0	Amon_DK:60958, Amon_BW:60962
Variants: Amon_DK.backmapping.sorted - Amon_DK	GT	60957	60958	2	177 -> 178	Substitution	0.045	8
Variants: Amon_BW.backmapping.sorted - Amon_BW	GT	60961	60962	2	152 -> 155	Substitution	10.3% -> 10.5%	16
Intraspecific Variants	C/A	62930	62930	1		SNP			7	petA-psbI	spacer	I	1	1	0	Amon_CT:62816
Variants: Amon_CT.backmapping.sorted - Amon_CT	C	62816	62816	1	157	SNP (transversion)	0.057	9
Intraspecific Variants	T/C	73790	73790	1		SNP			6	psbB-psbT	spacer	V	1	1	0	Amon_GL-Y2:73632
Variants: Amon_GL-Y2.backmapping.sorted - Amon_GL-Y2	T	73632	73632	1	2993	SNP (transition)	0.01	31
Intraspecific Variants	C/A	74814	74814	1		SNP			7	petB	intron	I	1	1	0	Amon_GL-Y2:74654
Variants: Amon_GL-Y2.backmapping.sorted - Amon_GL-Y2	C	74654	74654	1	3266	SNP (transversion)	0.015	48
Intraspecific Variants	A/G	78004	78004	1		SNP			6	rpoA	exon	V	1	1	0	Amon_MV:77932, Amon_BW:77936
Variants: Amon_MV.backmapping.sorted - Amon_MV	G	77932	77932	1	2341	SNP (transition)	0.01	24
Variants: Amon_BW.backmapping.sorted - Amon_BW	G	77936	77936	1	385	SNP (transition)	0.044	17
Intraspecific Variants	T/A	79181	79181	1		SNP			6	rps11	exon	V	1	1	Phe>Ile	Amon_GL-Y1:79021, Amon_GL-Y2:79021
Variants: Amon_GL-Y1.backmapping.sorted - Amon_GL-Y1	T	79021	79021	1	3392	SNP (transversion)	0.026	89
Variants: Amon_GL-Y2.backmapping.sorted - Amon_GL-Y2	T	79021	79021	1	3421	SNP (transversion)	0.027	91
Intraspecific Variants	C/T	79783	79783	1		SNP			6	infA	exon	V	1	1	0	Amon_DK:79704, Amon_MV:79705, Amon_BB-d:79709, Amon_BW:79709, Amon_CH:79702
Variants: Amon_DK.backmapping.sorted - Amon_DK	T	79704	79704	1	318	SNP (transition)	0.035	11
Variants: Amon_MV.backmapping.sorted - Amon_MV	T	79705	79705	1	2506	SNP (transition)	0.011	27
Variants: Amon_BB-d.backmapping.sorted - Amon_BB-d	T	79709	79709	1	143	SNP (transition)	0.14	20
Variants: Amon_BW.backmapping.sorted - Amon_BW	T	79709	79709	1	425	SNP (transition)	0.056	24
Variants: Amon_CH.backmapping.sorted - Amon_CH	T	79702	79702	1	229	SNP (transition)	0.039	9
Intraspecific Variants	G/T	80818	80818	1		SNP			6	rpl14	exon	I	1	1	0	Amon_GL-Y1:80652, Amon_GL-Y2:80652 -A!- Amon_AG:80738, Amon_BB-d:80744, Amon_BW:80744
Variants: Amon_GL-Y1.backmapping.sorted - Amon_GL-Y1	G	80652	80652	1	3445	SNP (transversion)	0.012	41
Variants: Amon_GL-Y2.backmapping.sorted - Amon_GL-Y2	G	80652	80652	1	3416	SNP (transversion)	0.015	52
Variants: Amon_AG.backmapping.sorted - Amon_AG	A	80738	80738	1	93	SNP (transition)	0.054	5
Variants: Amon_BB-d.backmapping.sorted - Amon_BB-d	A	80744	80744	1	119	SNP (transition)	0.059	7
Variants: Amon_BW.backmapping.sorted - Amon_BW	A	80744	80744	1	305	SNP (transition)	0.02	6
Intraspecific Variants	T/C	83373	83373	1		SNP			7	rpl22	exon	V	1	1	Ile>Met	Amon_DK:83294
Variants: Amon_DK.backmapping.sorted - Amon_DK	T	83294	83294	1	290	SNP (transition)	0.059	17
Intraspecific Variants	A/C	83559	83559	1		SNP			6	rpl22	exon	I	1	1	Met>Ile	Amon_AG:83479, Amon_DK:83480, Amon_BW:83485
Variants: Amon_AG.backmapping.sorted - Amon_AG	C	83479	83479	1	78	SNP (transversion)	0.064	5
Variants: Amon_DK.backmapping.sorted - Amon_DK	C	83480	83480	1	256	SNP (transversion)	0.039	10
Variants: Amon_BW.backmapping.sorted - Amon_BW	C	83485	83485	1	273	SNP (transversion)	0.073	20
Intraspecific Variants	A/C	108870	108870	1		SNP			6	(IR) ycf1	exon	I	1	1	Phe>Leu	Amon_GL-Y1:108704, Amon_GL-Y2:108704
Variants: Amon_GL-Y1.backmapping.sorted - Amon_GL-Y1	A	108704	108704	1	3361	SNP (transversion)	0.032	107
Variants: Amon_GL-Y2.backmapping.sorted - Amon_GL-Y2	A	108704	108704	1	3524	SNP (transversion)	0.036	126
Intraspecific Variants	G/T	109674	109674	1		SNP			7	ycf1	exon	I	1	1	Lys>Asn	Amon_BW:109600
Variants: Amon_BW.backmapping.sorted - Amon_BW	G	109600	109600	1	414	SNP (transversion)	0.043	18
Intraspecific Variants	C/A	112326	112326	1		SNP			6	ycf1	exon	I	1	1	0	Amon_GL-Y2:112154
Variants: Amon_GL-Y2.backmapping.sorted - Amon_GL-Y2	C	112154	112154	1	3289	SNP (transversion)	0.011	37
Intraspecific Variants	G/A	112922	112922	1		SNP			7	ycf1	exon	V	1	1	Gly>Glu	Amon_GL-Y1:112750, Amon_GL-Y2:112750
Variants: Amon_GL-Y1.backmapping.sorted - Amon_GL-Y1	G	112750	112750	1	3307	SNP (transition)	0.013	43
Variants: Amon_GL-Y2.backmapping.sorted - Amon_GL-Y2	G	112750	112750	1	3430	SNP (transition)	0.012	42
Intraspecific Variants	A/G	113085	113085	1		SNP			6	ycf1	exon	V	1	1	0	Amon_AG:113005, Amon_DK:113006, Amon_MV:113007, Amon_BB-d:113011, Amon_BW:113011
Variants: Amon_AG.backmapping.sorted - Amon_AG	G	113005	113005	1	70	SNP (transition)	0.057	4
Variants: Amon_DK.backmapping.sorted - Amon_DK	G	113006	113006	1	234	SNP (transition)	0.038	9
Variants: Amon_MV.backmapping.sorted - Amon_MV	G	113007	113007	1	2239	SNP (transition)	0.011	24
Variants: Amon_BB-d.backmapping.sorted - Amon_BB-d	G	113011	113011	1	152	SNP (transition)	0.079	12
Variants: Amon_BW.backmapping.sorted - Amon_BW	G	113011	113011	1	188	SNP (transition)	0.043	8
Intraspecific Variants	C/T	117418	117418	1		SNP			6	ndhA	exon 2	V	1	1	0	Amon_AG:117338, Amon_MV:117340, Amon_BW:117344, Amon_CH:117337
Variants: Amon_AG.backmapping.sorted - Amon_AG	T	117338	117338	1	69	SNP (transition)	0.072	5
Variants: Amon_MV.backmapping.sorted - Amon_MV	T	117340	117340	1	2486	SNP (transition)	0.014	35
Variants: Amon_BW.backmapping.sorted - Amon_BW	T	117344	117344	1	206	SNP (transition)	0.092	19
Variants: Amon_CH.backmapping.sorted - Amon_CH	T	117337	117337	1	220	SNP (transition)	0.027	6
Intraspecific Variants	C/T	118052	118052	1		SNP			6	ndhI	exon	V	1	1	0	Amon_MV:117974, Amon_BW:117978
Variants: Amon_MV.backmapping.sorted - Amon_MV	T	117974	117974	1	2489	SNP (transition)	0.015	37
Variants: Amon_BW.backmapping.sorted - Amon_BW	T	117978	117978	1	199	SNP (transition)	0.08	16
Intraspecific Variants	A/C	118198	118198	1		SNP			6	ndhI-ndhG	spacer	I	1	1	0	Amon_MV:118120, Amon_BW:118124
Variants: Amon_MV.backmapping.sorted - Amon_MV	C	118120	118120	1	2619	SNP (transversion)	0.011	30
Variants: Amon_BW.backmapping.sorted - Amon_BW	C	118124	118124	1	210	SNP (transversion)	0.062	13
Intraspecific Variants	T/G	118220	118220	1		SNP			6	ndhI-ndhG	spacer	I	1	1	0	Amon_BW:118146
Variants: Amon_BW.backmapping.sorted - Amon_BW	G	118146	118146	1	207	SNP (transversion)	0.048	10
Intraspecific Variants	A/C	118284	118284	1		SNP			6	ndhI-ndhG	spacer	I	1	1	0	Amon_MV:118206, Amon_BW:118210
Variants: Amon_MV.backmapping.sorted - Amon_MV	C	118206	118206	1	2728	SNP (transversion)	0.014	37
Variants: Amon_BW.backmapping.sorted - Amon_BW	C	118210	118210	1	175	SNP (transversion)	0.051	9
Intraspecific Variants	G/T	118305	118305	1		SNP			6	ndhI-ndhG	spacer	I	1	1	0	Amon_GL-Y1:118133, Amon_GL-Y2:118133
Variants: Amon_GL-Y1.backmapping.sorted - Amon_GL-Y1	G	118133	118133	1	3577	SNP (transversion)	0.017	60
Variants: Amon_GL-Y2.backmapping.sorted - Amon_GL-Y2	G	118133	118133	1	3601	SNP (transversion)	0.017	61
Intraspecific Variants	C/A	120025	120025	1		SNP			6	psaC-ndhD	spacer	I	1	1	0	Amon_GL-Y2:119853
Variants: Amon_GL-Y2.backmapping.sorted - Amon_GL-Y2	C	119853	119853	1	3127	SNP (transversion)	0.023	73
Intraspecific Variants	A/G	120254	120254	1		SNP			6	ndhD	exon	V	1	1	0	Amon_DK:120175 -!- Amon_GL-Y1:120082, Amon_GL-Y2:120082
Variants: Amon_DK.backmapping.sorted - Amon_DK	G	120175	120175	1	329	SNP (transition)	0.015	5
Variants: Amon_GL-Y1.backmapping.sorted - Amon_GL-Y1	A	120082	120082	1	3322	SNP (transition)	0.021	71
Variants: Amon_GL-Y2.backmapping.sorted - Amon_GL-Y2	A	120082	120082	1	3349	SNP (transition)	0.018	61
Intraspecific Variants	G/T	121849	121849	1		SNP			6	ccsA	exon	I	1	1	Tyr>Ser	Amon_GL-Y2:121677
Variants: Amon_GL-Y2.backmapping.sorted - Amon_GL-Y2	G	121677	121677	1	3363	SNP (transversion)	0.012	41
Intraspecific Variants	A/C	124716	124716	1		SNP			6	rpl32-ndhF	spacer	I	1	1	0	Amon_BB-d:124613
Variants: Amon_BB-d.backmapping.sorted - Amon_BB-d	C	124613	124613	1	159	SNP (transversion)	0.151	24
Intraspecific Variants	C/A	126331	126331	1		SNP			7	ndhF	exon	I	1	1	Gln>Lys	Amon_CT:126147
Variants: Amon_CT.backmapping.sorted - Amon_CT	C	126147	126147	1	160	SNP (transversion)	0.063	10
							0.027	28.9247

## Sheet: S2.5 Coding SNPs
Overview of amino acid properties
modified from Wikipedia "Amino acid" [2025/03], based on:
Kyte J, Doolittle RF (May 1982). "A simple method for displaying the hydropathic character of a protein". Journal of Molecular Biology. 157 (1): 105–132. doi:10.1016/0022-2836(82)90515-0
Freifelder D (1983). Physical Biochemistry (2nd ed.). W. H. Freeman and Company. ISBN 978-0-7167-1315-9
Kozlowski LP (January 2017). "Proteome-pI: proteome isoelectric point database". Nucleic Acids Research. 45 (D1): D1112 – D1116. doi:10.1093/nar/gkw978
Hausman RE, Cooper GM (2004). The cell: a molecular approach. Washington, D.C.: ASM Press. p. 51. ISBN 978-0-87893-214-6.
https://en.wikipedia.org/wiki/Amino_acid
Name	3 letter code	1 letter code	Class	Chemical polarity	Net charge at pH 7.4	Hydropho-bicity index	Molecular mass [Da]	Abundance in proteins [%]	Standard genetic coding
Alanine	Ala	A	Aliphatic	Nonpolar	Neutral	1.8	89.094	8.76	GCN
Arginine	Arg	R	Fixed cation	Basic polar	Positive	−4.5	174.203	5.78	MGR, CGY
Asparagine	Asn	N	Amide	Polar	Neutral	−3.5	132.119	3.93	AAY
Aspartate	Asp	D	Anion	Brønsted base	Negative	−3.5	133.104	5.49	GAY
Cysteine	Cys	C	Thiol	Brønsted acid	Neutral	2.5	121.154	1.38	UGY
Glutamine	Gln	Q	Amide	Polar	Neutral	−3.5	146.146	3.9	CAR
Glutamate	Glu	E	Anion	Brønsted base	Negative	−3.5	147.131	6.32	GAR
Glycine	Gly	G	Aliphatic	Nonpolar	Neutral	−0.4	75.067	7.03	GGN
Histidine	His	H	Cationic	Brønsted acid and base	10% Positive	−3.2	155.156	2.26	CAY
					90% Neutral
Isoleucine	Ile	I	Aliphatic	Nonpolar	Neutral	4.5	131.175	5.49	AUH
Leucine	Leu	L	Aliphatic	Nonpolar	Neutral	3.8	131.175	9.68	YUR, CUY
Lysine	Lys	K	Cation	Brønsted acid	Positive	−3.9	146.189	5.19	AAR
Methionine	Met	M	Thioether	Nonpolar	Neutral	1.9	149.208	2.32	AUG
Phenylalanine	Phe	F	Aromatic	Nonpolar	Neutral	2.8	165.192	3.87	UUY
Proline	Pro	P	Cyclic	Nonpolar	Neutral	−1.6	115.132	5.02	CCN
Serine	Ser	S	Hydroxylic	Polar	Neutral	−0.8	105.093	7.14	UCN, AGY
Threonine	Thr	T	Hydroxylic	Polar	Neutral	−0.7	119.119	5.53	ACN
Tryptophan	Trp	W	Aromatic	Nonpolar	Neutral	−0.9	204.228	1.25	UGG
Tyrosine	Tyr	Y	Aromatic	Brønsted acid	Neutral	−1.3	181.191	2.91	UAY
Valine	Val	V	Aliphatic	Nonpolar	Neutral	4.2	117.148	6.73	GUN
Similarity network of amino acid properties
modified from Stephenson & Freeland 2013, Figure 3
https://pmc.ncbi.nlm.nih.gov/articles/PMC6763418/#Fig3
Changes in amino acid properties caused by plastome coding SNPs in A. montana
Dissimilarity (node distance) between original and alternate amino acid, change polymorphic within single samples or not
IB/CNE: amino acid changes associated with the split between Iberian samples and Central and Northern European samples
	Change	Code	Node distance	IB/CNE
	Lys>Gln	K>Q	2	1
	Thr>Pro	T>P	5	0
	Glu>Asp	E>D	1	1
	Lys>Asn	K>N	4	0
	Glu>Gln	E>Q	4	0
	Phe>Ile	F>I	5	1
	Ile>Met	I>M	3	1
	Met>Ile	M>I	3	1
	Phe>Leu	F>L	5	1
	Asn>Lys	N>K	4	0
	Lys>Asn	K>N	4	1
	Glu>Asp	E>D	1	0
	Gly>Glu	G>E	7	1
	Tyr>Ser	Y>S	9	1
	Gln>Lys	K>Q	2	1
	Changes
	all			15
	IB/CNE			10
	Average node distances
	all		3.93333
	IB/CNE		4.1
	other		3.6

## Sheet: S2.6 All Polymorphisms Raw Data
Alignment of all Arnica montana samples (AM) - all Variants
Track Name	Name	Minimum	Maximum	Length	Coverage	Polymorphism Type	Variant Frequency	Variant Raw Frequency	Region	Group-specific	Internal Polymorphism	Site	Type
Intraspecific Variants	G/T	1280	1280	1	17	SNP	70.6%/29.4%	12/5	psbA	1	1	Amon_GL:1269	SNP
Intraspecific Variants	T/G	2631	2631	1	17	SNP	70.6%/29.4%	12/5	matK	1	0		SNP
Intraspecific Variants	G/T	2663	2663	1	17	SNP	88.2%/11.8%	15/2	matK	0	1	Amon_CT:2652	SNP
Intraspecific Variants	A/T	3236	3236	1	17	SNP	70.6%/29.4%	12/5	matK	1	0		SNP
Intraspecific Variants	A/G	3738	3738	1	17	SNP	70.6%/29.4%	12/5		1	0		SNP
Intraspecific Variants	C/T	3943	3943	1	17	SNP	70.6%/29.4%	12/5		1	0		SNP
Intraspecific Variants	G/T	7890	7890	1	17	SNP	82.4%/17.6%	14/3		1	0		SNP
Intraspecific Variants	C/A	8146	8146	1	17	SNP	70.6%/29.4%	12/5		1	0		SNP
Intraspecific Variants	G/T	8967	8967	1	17	SNP	82.4%/17.6%	14/3		0	0		SNP
Intraspecific Variants	A/C	9247	9247	1	17	SNP	70.6%/29.4%	12/5		1	0		SNP
Intraspecific Variants	A/T	9338	9338	1	17	SNP	70.6%/29.4%	12/5		1	0		SNP
Intraspecific Variants	C/A	14376	14376	1	17	SNP	70.6%/29.4%	12/5		1	0	Amon_AG:14359, Amon_BB-d:14359, Amon_BW:14363	SNP
Intraspecific Variants	G/T	16930	16930	1	17	SNP	64.7%/35.3%	11/6		0	0		SNP
Intraspecific Variants	C/A	21377	21377	1	17	SNP	70.6%/29.4%	12/5	rpoC2	1	0		SNP
Intraspecific Variants	T/C	21664	21664	1	17	SNP	70.6%/29.4%	12/5	rpoC2	1	1	Amon_BB-d:21619, Amon_BW:21623	SNP
Intraspecific Variants	C/G	21715	21715	1	17	SNP	70.6%/29.4%	12/5	rpoC2	1	1	Amon_GL-Y1:21679	SNP
Intraspecific Variants	G/T	24415	24415	1	17	SNP	70.6%/29.4%	12/5		1	0		SNP
Intraspecific Variants	T/C	26066	26066	1	17	SNP	70.6%/29.4%	12/5		1	1	Amon_BW:26024	SNP
Intraspecific Variants	G/T	26195	26195	1	17	SNP	88.2%/11.8%	15/2		0	1	Amon_CT:26137	SNP
Intraspecific Variants	A/G	30870	30870	1	17	SNP	58.8%/41.2%	10/7		0	1	Amon_DK:30819, Amon_MV:30820, Amon_BW:30824	SNP
Intraspecific Variants	T/C	31819	31819	1	17	SNP	70.6%/29.4%	12/5		1	0		SNP
Intraspecific Variants	T/C	36530	36530	1	17	SNP	70.6%/29.4%	12/5		1	0		SNP
Intraspecific Variants	A/C	36648	36648	1	17	SNP	70.6%/29.4%	12/5	rps14	1	1	Amon_CT:36559, Amon_GL-Y1:36564, Amon_GL-Y2:36564	SNP
Intraspecific Variants	G/A	43152	43152	1	17	SNP	88.2%/11.8%	15/2		0	0		SNP
Intraspecific Variants	A/T	44336	44336	1	17	SNP	70.6%/29.4%	12/5		1	0		SNP
Intraspecific Variants	A/T	44373	44373	1	17	SNP	70.6%/29.4%	12/5		1	0		SNP
Intraspecific Variants	G/A	45442	45442	1	17	SNP	70.6%/29.4%	12/5		1	1	Amon_CT:45351	SNP
Intraspecific Variants	A/G	46471	46471	1	17	SNP	70.6%/29.4%	12/5		1	1	Amon_BB-d:46418	SNP
Intraspecific Variants	A/T	46675	46675	1	17	SNP	70.6%/29.4%	12/5		1	0		SNP
Intraspecific Variants	G/C	47329	47329	1	17	SNP	70.6%/29.4%	12/5		1	1	Amon_GL-Y1:47243, Amon_GL-Y2:47244	SNP
Intraspecific Variants	C/A	47864	47864	1	17	SNP	70.6%/29.4%	12/5		1	1	Amon_GL-Y1:47778, Amon_GL-Y2:47778	SNP
Intraspecific Variants	T/A	49620	49620	1	17	SNP	76.5%/23.5%	13/4		0	1	Amon_DK:49566	SNP
Intraspecific Variants	A/G	49659	49659	1	17	SNP	70.6%/29.4%	12/5		1	1	Amon_DK:49605, Amon_BB-d:49605, Amon_BW:49609	SNP
Intraspecific Variants	C/G	54074	54074	1	17	SNP	88.2%/11.8%	15/2		0	0		SNP
Intraspecific Variants	G/A	54240	54240	1	17	SNP	82.4%/17.6%	14/3		0	1	Amon_GL-Y1:54134, Amon_GL-Y2:54134	SNP
Intraspecific Variants	G/C	54555	54555	1	17	SNP	70.6%/29.4%	12/5		1	1	Amon_BB-d:54500, Amon_BW:54505, Amon_CH:54499	SNP
Intraspecific Variants	T/C	54678	54678	1	17	SNP	70.6%/29.4%	12/5		1	1	Amon_MV:54623, Amon_BW:54626	SNP
Intraspecific Variants	C/G	56291	56291	1	17	SNP	70.6%/29.4%	12/5		1	0		SNP
Intraspecific Variants	C/A	56626	56626	1	17	SNP	70.6%/29.4%	12/5		1	0		SNP
Intraspecific Variants	C/A	56819	56819	1	17	SNP	70.6%/29.4%	12/5		1	1	Amon_GL-Y1:56712, Amon_GL-Y2:56712	SNP
Intraspecific Variants	C/A	59119	59119	1	17	SNP	70.6%/29.4%	12/5		1	1	Amon_GL-Y1:59012	SNP
Intraspecific Variants	C/T	59352	59352	1	17	SNP	82.4%/17.6%	14/3		0	1	Amon_GL-Y1:59245, Amon_GL-Y2:59245	SNP
Intraspecific Variants	T/G	61025	61025	1	17	SNP	70.6%/29.4%	12/5		1	1	Amon_DK:60957, Amon_BW:60961	SNP
Intraspecific Variants	C/T	61026	61026	1	17	SNP	70.6%/29.4%	12/5		1	1	Amon_DK:60958, Amon_BW:60962	SNP
Intraspecific Variants	C/A	62930	62930	1	17	SNP	88.2%/11.8%	15/2		0	1	Amon_CT:62816	SNP
Intraspecific Variants	C/A	68235	68235	1	17	SNP	88.2%/11.8%	15/2		0	0		SNP
Intraspecific Variants	T/C	73790	73790	1	17	SNP	70.6%/29.4%	12/5		1	1	Amon_GL-Y2:73632	SNP
Intraspecific Variants	C/A	74814	74814	1	17	SNP	82.4%/17.6%	14/3		0	1	Amon_GL-Y2:74654	SNP
Intraspecific Variants	T/A	75216	75216	1	17	SNP	70.6%/29.4%	12/5		1	0		SNP
Intraspecific Variants	A/G	78004	78004	1	17	SNP	70.6%/29.4%	12/5	rpoA	1	1	Amon_MV:77932, Amon_BW:77936	SNP
Intraspecific Variants	T/A	79181	79181	1	17	SNP	70.6%/29.4%	12/5	rps11	1	1	Amon_GL-Y1:79021, Amon_GL-Y2:79021	SNP
Intraspecific Variants	C/T	79783	79783	1	17	SNP	70.6%/29.4%	12/5	infA	1	1	Amon_DK:79704, Amon_MV:79705, Amon_BB-d:79709, Amon_BW:79709, Amon_CH:79702	SNP
Intraspecific Variants	G/T	80818	80818	1	17	SNP	70.6%/29.4%	12/5	rpl14	1	1	Amon_GL-Y1:80652, Amon_GL-Y2:80652 -A!- Amon_AG:80738, Amon_BB-d:80744, Amon_BW:80744	SNP
Intraspecific Variants	T/C	83373	83373	1	17	SNP	88.2%/11.8%	15/2	rpl22	0	1	Amon_DK:83294	SNP
Intraspecific Variants	A/C	83559	83559	1	17	SNP	70.6%/29.4%	12/5	rpl22	1	1	Amon_AG:83479, Amon_DK:83480, Amon_BW:83485	SNP
Intraspecific Variants	T/C	101342	101342	1	17	SNP	70.6%/29.4%	12/5	(IR)	1	0		SNP
Intraspecific Variants	C/T	103166	103166	1	17	SNP	88.2%/11.8%	15/2	(IR)	0	0		SNP
Intraspecific Variants	A/C	108870	108870	1	17	SNP	70.6%/29.4%	12/5	(IR) ycf1	1	1	Amon_GL-Y1:108704, Amon_GL-Y2:108704	SNP
Intraspecific Variants	A/C	109365	109365	1	17	SNP	88.2%/11.8%	15/2	ycf1	0	0		SNP
Intraspecific Variants	G/T	109509	109509	1	17	SNP	70.6%/29.4%	12/5	ycf1	1	0		SNP
Intraspecific Variants	G/T	109674	109674	1	17	SNP	88.2%/11.8%	15/2	ycf1	0	1	Amon_BW:109600	SNP
Intraspecific Variants	T/G	111963	111963	1	17	SNP	70.6%/29.4%	12/5	ycf1	1	0		SNP
Intraspecific Variants	C/A	112326	112326	1	17	SNP	70.6%/29.4%	12/5	ycf1	1	1	Amon_GL-Y2:112154	SNP
Intraspecific Variants	G/A	112922	112922	1	17	SNP	82.4%/17.6%	14/3	ycf1	0	1	Amon_GL-Y1:112750, Amon_GL-Y2:112750	SNP
Intraspecific Variants	A/G	113085	113085	1	17	SNP	70.6%/29.4%	12/5	ycf1	1	1	Amon_AG:113005, Amon_DK:113006, Amon_MV:113007, Amon_BB-d:113011, Amon_BW:113011	SNP
Intraspecific Variants	G/T	113466	113466	1	17	SNP	88.2%/11.8%	15/2		0	0		SNP
Intraspecific Variants	T/A	116102	116102	1	17	SNP	70.6%/29.4%	12/5		1	0		SNP
Intraspecific Variants	T/G	116510	116510	1	17	SNP	70.6%/29.4%	12/5		1	0		SNP
Intraspecific Variants	G/A	116553	116553	1	17	SNP	82.4%/17.6%	14/3		0	0		SNP
Intraspecific Variants	T/A	116704	116704	1	17	SNP	58.8%/41.2%	10/7		0	0		SNP
Intraspecific Variants	C/T	117418	117418	1	17	SNP	70.6%/29.4%	12/5	ndhA	1	1	Amon_AG:117338, Amon_MV:117340, Amon_BW:117344, Amon_CH:117337	SNP
Intraspecific Variants	C/T	118052	118052	1	17	SNP	70.6%/29.4%	12/5	ndhI	1	1	Amon_MV:117974, Amon_BW:117978	SNP
Intraspecific Variants	A/C	118198	118198	1	17	SNP	70.6%/29.4%	12/5		1	1	Amon_MV:118120, Amon_BW:118124	SNP
Intraspecific Variants	T/G	118220	118220	1	17	SNP	70.6%/29.4%	12/5		1	1	Amon_BW:118146	SNP
Intraspecific Variants	A/C	118284	118284	1	17	SNP	70.6%/29.4%	12/5		1	1	Amon_MV:118206, Amon_BW:118210	SNP
Intraspecific Variants	G/T	118305	118305	1	17	SNP	70.6%/29.4%	12/5		1	1	Amon_GL-Y1:118133, Amon_GL-Y2:118133	SNP
Intraspecific Variants	C/A	120025	120025	1	17	SNP	70.6%/29.4%	12/5		1	1	Amon_GL-Y2:119853	SNP
Intraspecific Variants	A/G	120254	120254	1	17	SNP	70.6%/29.4%	12/5	ndhD	1	1	Amon_DK:120175 -!- Amon_GL-Y1:120082, Amon_GL-Y2:120082	SNP
Intraspecific Variants	G/T	121849	121849	1	17	SNP	70.6%/29.4%	12/5		1	1	Amon_GL-Y2:121677	SNP
Intraspecific Variants	G/T	123602	123602	1	17	SNP	70.6%/29.4%	12/5		1	0		SNP
Intraspecific Variants	T/G	123666	123666	1	17	SNP	76.5%/23.5%	13/4		0	0		SNP
Intraspecific Variants	T/G	123774	123774	1	17	SNP	70.6%/29.4%	12/5		1	0		SNP
Intraspecific Variants	G/T	124119	124119	1	17	SNP	70.6%/29.4%	12/5		1	0		SNP
Intraspecific Variants	A/C	124716	124716	1	17	SNP	70.6%/29.4%	12/5		1	1	Amon_BB-d:124613	SNP
Intraspecific Variants	C/T	125979	125979	1	17	SNP	70.6%/29.4%	12/5		1	0		SNP
Intraspecific Variants	C/A	126331	126331	1	17	SNP	88.2%/11.8%	15/2		0	1	Amon_CT:126147	SNP
Intraspecific Variants	C/A/-	148	148	1	17	Indel	88.2%/5.9%/5.9%	15/1/1		0	0		Inversion
Intraspecific Variants	T/-	149	149	1	17	Indel	94.1%/5.9%	16/1		0	0		Inversion
Intraspecific Variants	T/-	150	150	1	17	Indel	94.1%/5.9%	16/1		0	0		Inversion
Intraspecific Variants	A/-	151	151	1	17	Indel	94.1%/5.9%	16/1		0	0		Inversion
Intraspecific Variants	T/A/-	152	152	1	17	Indel	88.2%/5.9%/5.9%	15/1/1		0	0		Inversion
Intraspecific Variants	T/A/-	153	153	1	17	Indel	88.2%/5.9%/5.9%	15/1/1		0	0		Inversion
Intraspecific Variants	T/-	154	154	1	17	Indel	94.1%/5.9%	16/1		0	0		Inversion
Intraspecific Variants	-/A	155	155	1	17	Indel	88.2%/11.8%	15/2		0	0		Inversion
Intraspecific Variants	-/T	156	156	1	17	Indel	94.1%/5.9%	16/1		0	0		Inversion
Intraspecific Variants	-/T	157	157	1	17	Indel	94.1%/5.9%	16/1		0	0		Inversion
Intraspecific Variants	-/A	158	158	1	17	Indel	94.1%/5.9%	16/1		0	0		Inversion
Intraspecific Variants	-/A	159	159	1	17	Indel	94.1%/5.9%	16/1		0	0		Inversion
Intraspecific Variants	-/A	160	160	1	17	Indel	94.1%/5.9%	16/1		0	0		Inversion
Intraspecific Variants	-/T	161	161	1	17	Indel	94.1%/5.9%	16/1		0	0		Inversion
Intraspecific Variants	-/A	162	162	1	17	Indel	94.1%/5.9%	16/1		0	0		Inversion
Intraspecific Variants	-/A	163	163	1	17	Indel	88.2%/11.8%	15/2		0	0		Inversion
Intraspecific Variants	-/G	164	164	1	17	Indel	88.2%/11.8%	15/2		0	0		Inversion
Intraspecific Variants	-/A	165	165	1	17	Indel	88.2%/11.8%	15/2		0	0		Inversion
Intraspecific Variants	T/-	2299	2299	1	17	Indel	88.2%/11.8%	15/2	matK	0	1	Amon_CH:2288, Amon_DK, Amon_MV, Amon_BW	polyA
Intraspecific Variants	-/A	4029	4029	1	17	Indel	70.6%/29.4%	12/5		1	0		polyA
Intraspecific Variants	-/A	4770	4770	1	17	Indel	70.6%/29.4%	12/5		1	1		polyA
Intraspecific Variants	-/A	4771	4771	1	17	Indel	70.6%/29.4%	12/5		1	1		polyA
Intraspecific Variants	A/-	7202	7202	1	17	Indel	70.6%/29.4%	12/5		1	0		long Indel
Intraspecific Variants	A/-	7203	7203	1	17	Indel	70.6%/29.4%	12/5		1	0		long Indel
Intraspecific Variants	A/-	7204	7204	1	17	Indel	70.6%/29.4%	12/5		1	0		long Indel
Intraspecific Variants	G/-	7205	7205	1	17	Indel	70.6%/29.4%	12/5		1	0		long Indel
Intraspecific Variants	A/-	7206	7206	1	17	Indel	70.6%/29.4%	12/5		1	0		long Indel
Intraspecific Variants	A/-	7207	7207	1	17	Indel	70.6%/29.4%	12/5		1	0		long Indel
Intraspecific Variants	G/-	7208	7208	1	17	Indel	70.6%/29.4%	12/5		1	0		long Indel
Intraspecific Variants	T/-	7209	7209	1	17	Indel	70.6%/29.4%	12/5		1	0		long Indel
Intraspecific Variants	A/-	7210	7210	1	17	Indel	70.6%/29.4%	12/5		1	0		long Indel
Intraspecific Variants	T/-	7211	7211	1	17	Indel	70.6%/29.4%	12/5		1	0		long Indel
Intraspecific Variants	T/-	7212	7212	1	17	Indel	70.6%/29.4%	12/5		1	0		long Indel
Intraspecific Variants	C/-	7213	7213	1	17	Indel	70.6%/29.4%	12/5		1	0		long Indel
Intraspecific Variants	G/-	7214	7214	1	17	Indel	70.6%/29.4%	12/5		1	0		long Indel
Intraspecific Variants	G/-	7215	7215	1	17	Indel	70.6%/29.4%	12/5		1	0		long Indel
Intraspecific Variants	A/-	7216	7216	1	17	Indel	70.6%/29.4%	12/5		1	0		long Indel
Intraspecific Variants	T/-	7217	7217	1	17	Indel	70.6%/29.4%	12/5		1	0		long Indel
Intraspecific Variants	A/-	7218	7218	1	17	Indel	70.6%/29.4%	12/5		1	0		long Indel
Intraspecific Variants	C/-	7219	7219	1	17	Indel	70.6%/29.4%	12/5		1	0		long Indel
Intraspecific Variants	T/-	7220	7220	1	17	Indel	70.6%/29.4%	12/5		1	0		long Indel
Intraspecific Variants	G/-	7733	7733	1	17	Indel	82.4%/17.6%	14/3		0	0		short Indel
Intraspecific Variants	T/-	7734	7734	1	17	Indel	82.4%/17.6%	14/3		0	0		short Indel
Intraspecific Variants	C/-	7735	7735	1	17	Indel	82.4%/17.6%	14/3		0	0		short Indel
Intraspecific Variants	-/A	9832	9832	1	17	Indel	88.2%/11.8%	15/2		0	0		polyA
Intraspecific Variants	-/A	9853	9853	1	17	Indel	88.2%/11.8%	15/2		0	1		polyA
Intraspecific Variants	-/T	12959	12959	1	17	Indel	88.2%/11.8%	15/2		0	1		polyA
Intraspecific Variants	-/T	16916	16916	1	17	Indel	70.6%/29.4%	12/5		1	0		polyA
Intraspecific Variants	C/-	17310	17310	1	17	Indel	64.7%/35.3%	11/6		0	0		long Indel
Intraspecific Variants	G/-	17311	17311	1	17	Indel	64.7%/35.3%	11/6		0	0		long Indel
Intraspecific Variants	-/A	17312	17312	1	17	Indel	82.4%/17.6%	14/3		0	0		long Indel
Intraspecific Variants	-/G	17313	17313	1	17	Indel	82.4%/17.6%	14/3		0	0		long Indel
Intraspecific Variants	-/A	17314	17314	1	17	Indel	82.4%/17.6%	14/3		0	0		long Indel
Intraspecific Variants	-/A	17315	17315	1	17	Indel	82.4%/17.6%	14/3		0	0		long Indel
Intraspecific Variants	-/C	17316	17316	1	17	Indel	82.4%/17.6%	14/3		0	0		long Indel
Intraspecific Variants	-/T	17317	17317	1	17	Indel	82.4%/17.6%	14/3		0	0		long Indel
Intraspecific Variants	-/C	17318	17318	1	17	Indel	82.4%/17.6%	14/3		0	0		long Indel
Intraspecific Variants	-/C	17319	17319	1	17	Indel	82.4%/17.6%	14/3		0	0		long Indel
Intraspecific Variants	-/T	17320	17320	1	17	Indel	82.4%/17.6%	14/3		0	0		long Indel
Intraspecific Variants	-/T	17321	17321	1	17	Indel	82.4%/17.6%	14/3		0	0		long Indel
Intraspecific Variants	-/T	17322	17322	1	17	Indel	82.4%/17.6%	14/3		0	0		long Indel
Intraspecific Variants	-/C	17323	17323	1	17	Indel	82.4%/17.6%	14/3		0	0		long Indel
Intraspecific Variants	-/T	17324	17324	1	17	Indel	82.4%/17.6%	14/3		0	0		long Indel
Intraspecific Variants	-/T	17325	17325	1	17	Indel	82.4%/17.6%	14/3		0	0		long Indel
Intraspecific Variants	-/T	17326	17326	1	17	Indel	82.4%/17.6%	14/3		0	0		long Indel
Intraspecific Variants	-/T	17327	17327	1	17	Indel	82.4%/17.6%	14/3		0	0		long Indel
Intraspecific Variants	-/T	17328	17328	1	17	Indel	82.4%/17.6%	14/3		0	0		long Indel
Intraspecific Variants	-/C	17329	17329	1	17	Indel	82.4%/17.6%	14/3		0	0		long Indel
Intraspecific Variants	-/T	17330	17330	1	17	Indel	82.4%/17.6%	14/3		0	0		long Indel
Intraspecific Variants	-/T	17331	17331	1	17	Indel	82.4%/17.6%	14/3		0	0		long Indel
Intraspecific Variants	-/T	17332	17332	1	17	Indel	82.4%/17.6%	14/3		0	0		long Indel
Intraspecific Variants	-/T	17333	17333	1	17	Indel	82.4%/17.6%	14/3		0	0		long Indel
Intraspecific Variants	-/T	17334	17334	1	17	Indel	82.4%/17.6%	14/3		0	0		long Indel
Intraspecific Variants	-/T	17335	17335	1	17	Indel	82.4%/17.6%	14/3		0	0		long Indel
Intraspecific Variants	-/T	17336	17336	1	17	Indel	82.4%/17.6%	14/3		0	0		long Indel
Intraspecific Variants	C/-	17337	17337	1	17	Indel	52.9%/47.1%	9/8		0	0		long Indel
Intraspecific Variants	G/-	17338	17338	1	17	Indel	52.9%/47.1%	9/8		0	0		long Indel
Intraspecific Variants	-/T	25287	25287	1	17	Indel	88.2%/11.8%	15/2		0	0		polyA
Intraspecific Variants	T/-	25288	25288	1	17	Indel	82.4%/17.6%	14/3		0	0		polyA
Intraspecific Variants	T/-	25618	25618	1	17	Indel	82.4%/17.6%	14/3		0	0		long Indel
Intraspecific Variants	G/-	25619	25619	1	17	Indel	82.4%/17.6%	14/3		0	0		long Indel
Intraspecific Variants	T/-	25620	25620	1	17	Indel	82.4%/17.6%	14/3		0	0		long Indel
Intraspecific Variants	T/-	25621	25621	1	17	Indel	82.4%/17.6%	14/3		0	0		long Indel
Intraspecific Variants	A/-	25622	25622	1	17	Indel	82.4%/17.6%	14/3		0	0		long Indel
Intraspecific Variants	T/-	25623	25623	1	17	Indel	82.4%/17.6%	14/3		0	0		long Indel
Intraspecific Variants	T/-	25624	25624	1	17	Indel	82.4%/17.6%	14/3		0	0		long Indel
Intraspecific Variants	A/-	25625	25625	1	17	Indel	82.4%/17.6%	14/3		0	0		long Indel
Intraspecific Variants	A/-	25626	25626	1	17	Indel	82.4%/17.6%	14/3		0	0		long Indel
Intraspecific Variants	A/-	25627	25627	1	17	Indel	82.4%/17.6%	14/3		0	0		long Indel
Intraspecific Variants	T/-	28355	28355	1	17	Indel	64.7%/35.3%	11/6		1	0		polyA
Intraspecific Variants	T/-	28356	28356	1	17	Indel	64.7%/35.3%	11/6		1	0		polyA
Intraspecific Variants	T/-	28357	28357	1	17	Indel	58.8%/41.2%	10/7		1	0		polyA
Intraspecific Variants	-/A	28358	28358	1	17	Indel	70.6%/29.4%	12/5		1	0		polyA
Intraspecific Variants	-/T	28359	28359	1	17	Indel	82.4%/17.6%	14/3		1	0		polyA
Intraspecific Variants	-/T	28360	28360	1	17	Indel	70.6%/29.4%	12/5		1	0		polyA
Intraspecific Variants	-/T	28361	28361	1	17	Indel	64.7%/35.3%	11/6		1	0		polyA
Intraspecific Variants	T/-	28362	28362	1	17	Indel	52.9%/47.1%	9/8		1	0		polyA
Intraspecific Variants	T/-	28363	28363	1	17	Indel	82.4%/17.6%	14/3		1	0		polyA
Intraspecific Variants	T/-	28364	28364	1	17	Indel	82.4%/17.6%	14/3		1	0		polyA
Intraspecific Variants	T/-	28365	28365	1	17	Indel	82.4%/17.6%	14/3		1	0		polyA
Intraspecific Variants	T/-	28366	28366	1	17	Indel	82.4%/17.6%	14/3		1	0		polyA
Intraspecific Variants	A/-	30166	30166	1	17	Indel	70.6%/29.4%	12/5		1	1		polyA
Intraspecific Variants	-/T	31247	31247	1	17	Indel	70.6%/29.4%	12/5		1	1		polyA
Intraspecific Variants	A/-	31433	31433	1	17	Indel	70.6%/29.4%	12/5		1	0		long Indel
Intraspecific Variants	T/-	31434	31434	1	17	Indel	70.6%/29.4%	12/5		1	0		long Indel
Intraspecific Variants	T/-	31435	31435	1	17	Indel	70.6%/29.4%	12/5		1	0		long Indel
Intraspecific Variants	A/-	31436	31436	1	17	Indel	70.6%/29.4%	12/5		1	0		long Indel
Intraspecific Variants	T/-	31437	31437	1	17	Indel	70.6%/29.4%	12/5		1	0		long Indel
Intraspecific Variants	T/-	31438	31438	1	17	Indel	70.6%/29.4%	12/5		1	0		long Indel
Intraspecific Variants	A/-	31439	31439	1	17	Indel	70.6%/29.4%	12/5		1	0		long Indel
Intraspecific Variants	T/-	31440	31440	1	17	Indel	70.6%/29.4%	12/5		1	0		long Indel
Intraspecific Variants	T/-	31441	31441	1	17	Indel	70.6%/29.4%	12/5		1	0		long Indel
Intraspecific Variants	A/-	31442	31442	1	17	Indel	70.6%/29.4%	12/5		1	0		long Indel
Intraspecific Variants	T/-	31443	31443	1	17	Indel	70.6%/29.4%	12/5		1	0		long Indel
Intraspecific Variants	C/-	31444	31444	1	17	Indel	70.6%/29.4%	12/5		1	0		long Indel
Intraspecific Variants	A/-	31445	31445	1	17	Indel	70.6%/29.4%	12/5		1	0		long Indel
Intraspecific Variants	C/-	31446	31446	1	17	Indel	70.6%/29.4%	12/5		1	0		long Indel
Intraspecific Variants	G/-	31447	31447	1	17	Indel	70.6%/29.4%	12/5		1	0		long Indel
Intraspecific Variants	A/-	31448	31448	1	17	Indel	70.6%/29.4%	12/5		1	0		long Indel
Intraspecific Variants	A/-	31449	31449	1	17	Indel	70.6%/29.4%	12/5		1	0		long Indel
Intraspecific Variants	T/-	31450	31450	1	17	Indel	70.6%/29.4%	12/5		1	0		long Indel
Intraspecific Variants	C/-	31451	31451	1	17	Indel	70.6%/29.4%	12/5		1	0		long Indel
Intraspecific Variants	A/-	31781	31781	1	17	Indel	70.6%/29.4%	12/5		1	0		long Indel
Intraspecific Variants	G/-	31782	31782	1	17	Indel	70.6%/29.4%	12/5		1	0		long Indel
Intraspecific Variants	A/-	31783	31783	1	17	Indel	70.6%/29.4%	12/5		1	0		long Indel
Intraspecific Variants	A/-	31784	31784	1	17	Indel	70.6%/29.4%	12/5		1	0		long Indel
Intraspecific Variants	T/-	31785	31785	1	17	Indel	70.6%/29.4%	12/5		1	0		long Indel
Intraspecific Variants	T/-	31786	31786	1	17	Indel	70.6%/29.4%	12/5		1	0		long Indel
Intraspecific Variants	C/-	31787	31787	1	17	Indel	70.6%/29.4%	12/5		1	0		long Indel
Intraspecific Variants	A/-	35026	35026	1	17	Indel	82.4%/17.6%	14/3		1	1		polyA
Intraspecific Variants	A/-	35027	35027	1	17	Indel	88.2%/11.8%	15/2		1	1		polyA
Intraspecific Variants	-/T	36356	36356	1	17	Indel	70.6%/29.4%	12/5		1	1		polyA
Intraspecific Variants	T/-	41986	41986	1	17	Indel	58.8%/41.2%	10/7		1	1		polyA
Intraspecific Variants	T/-	41987	41987	1	17	Indel	70.6%/29.4%	12/5		1	1		polyA
Intraspecific Variants	-/A	46785	46785	1	17	Indel	70.6%/29.4%	12/5		1	1		polyA
Intraspecific Variants	-/T	50331	50331	1	17	Indel	64.7%/35.3%	11/6		0	1		polyA
Intraspecific Variants	T/-	50332	50332	1	17	Indel	70.6%/29.4%	12/5		0	1		polyA
Intraspecific Variants	T/-	50333	50333	1	17	Indel	88.2%/11.8%	15/2		0	1		polyA
Intraspecific Variants	T/-	51856	51856	1	17	Indel	82.4%/17.6%	14/3		1	0		long Indel
Intraspecific Variants	T/-	51857	51857	1	17	Indel	82.4%/17.6%	14/3		1	0		long Indel
Intraspecific Variants	G/-	51858	51858	1	17	Indel	82.4%/17.6%	14/3		1	0		long Indel
Intraspecific Variants	T/-	51859	51859	1	17	Indel	82.4%/17.6%	14/3		1	0		long Indel
Intraspecific Variants	A/-	51860	51860	1	17	Indel	82.4%/17.6%	14/3		1	0		long Indel
Intraspecific Variants	A/-	51861	51861	1	17	Indel	82.4%/17.6%	14/3		1	0		long Indel
Intraspecific Variants	T/-	51862	51862	1	17	Indel	82.4%/17.6%	14/3		1	0		long Indel
Intraspecific Variants	A/-	51863	51863	1	17	Indel	82.4%/17.6%	14/3		1	0		long Indel
Intraspecific Variants	C/-	51864	51864	1	17	Indel	82.4%/17.6%	14/3		1	0		long Indel
Intraspecific Variants	A/-	51865	51865	1	17	Indel	70.6%/29.4%	12/5		1	0		long Indel
Intraspecific Variants	T/-	51866	51866	1	17	Indel	70.6%/29.4%	12/5		1	0		long Indel
Intraspecific Variants	A/-	51867	51867	1	17	Indel	70.6%/29.4%	12/5		1	0		long Indel
Intraspecific Variants	T/-	51868	51868	1	17	Indel	70.6%/29.4%	12/5		1	0		long Indel
Intraspecific Variants	T/-	51869	51869	1	17	Indel	70.6%/29.4%	12/5		1	0		long Indel
Intraspecific Variants	T/-	51870	51870	1	17	Indel	70.6%/29.4%	12/5		1	0		long Indel
Intraspecific Variants	T/-	51871	51871	1	17	Indel	70.6%/29.4%	12/5		1	0		long Indel
Intraspecific Variants	A/-	51872	51872	1	17	Indel	70.6%/29.4%	12/5		1	0		long Indel
Intraspecific Variants	T/-	51873	51873	1	17	Indel	70.6%/29.4%	12/5		1	0		long Indel
Intraspecific Variants	T/-	51874	51874	1	17	Indel	88.2%/11.8%	15/2		1	0		long Indel
Intraspecific Variants	T/-	51875	51875	1	17	Indel	88.2%/11.8%	15/2		1	0		long Indel
Intraspecific Variants	G/-	51876	51876	1	17	Indel	88.2%/11.8%	15/2		1	0		long Indel
Intraspecific Variants	T/-	51877	51877	1	17	Indel	88.2%/11.8%	15/2		1	0		long Indel
Intraspecific Variants	A/-	51878	51878	1	17	Indel	88.2%/11.8%	15/2		1	0		long Indel
Intraspecific Variants	A/-	51879	51879	1	17	Indel	88.2%/11.8%	15/2		1	0		long Indel
Intraspecific Variants	T/-	51880	51880	1	17	Indel	88.2%/11.8%	15/2		1	0		long Indel
Intraspecific Variants	A/-	51881	51881	1	17	Indel	88.2%/11.8%	15/2		1	0		long Indel
Intraspecific Variants	C/-	51882	51882	1	17	Indel	88.2%/11.8%	15/2		1	0		long Indel
Intraspecific Variants	-/T	54598	54598	1	17	Indel	70.6%/29.4%	12/5		1	1		polyA
Intraspecific Variants	-/T	54599	54599	1	17	Indel	70.6%/29.4%	12/5		1	1		polyA
Intraspecific Variants	A/T/-	54748	54748	1	17	Indel	70.6%/17.6%/11.8%	12/3/2		1	1		polyA
Intraspecific Variants	-/T	54749	54749	1	17	Indel	88.2%/11.8%	15/2		1	1		polyA
Intraspecific Variants	-/T	54750	54750	1	17	Indel	70.6%/29.4%	12/5		1	1		polyA
Intraspecific Variants	-/T	54751	54751	1	17	Indel	70.6%/29.4%	12/5		1	1		polyA
Intraspecific Variants	-/A	56528	56528	1	17	Indel	70.6%/29.4%	12/5		1	0		long Indel
Intraspecific Variants	-/T	56529	56529	1	17	Indel	70.6%/29.4%	12/5		1	0		long Indel
Intraspecific Variants	-/A	56530	56530	1	17	Indel	70.6%/29.4%	12/5		1	0		long Indel
Intraspecific Variants	-/C	56531	56531	1	17	Indel	70.6%/29.4%	12/5		1	0		long Indel
Intraspecific Variants	-/T	56532	56532	1	17	Indel	70.6%/29.4%	12/5		1	0		long Indel
Intraspecific Variants	-/T	56533	56533	1	17	Indel	70.6%/29.4%	12/5		1	0		long Indel
Intraspecific Variants	-/A	56534	56534	1	17	Indel	70.6%/29.4%	12/5		1	0		long Indel
Intraspecific Variants	-/T	56535	56535	1	17	Indel	70.6%/29.4%	12/5		1	0		long Indel
Intraspecific Variants	-/T	59302	59302	1	17	Indel	76.5%/23.5%	13/4		1	1		polyA
Intraspecific Variants	T/-	63015	63015	1	17	Indel	70.6%/29.4%	12/5		1	1		polyA
Intraspecific Variants	T/-	63207	63207	1	17	Indel	82.4%/17.6%	14/3		1	0		long Indel
Intraspecific Variants	T/-	63208	63208	1	17	Indel	82.4%/17.6%	14/3		1	0		long Indel
Intraspecific Variants	C/-	63209	63209	1	17	Indel	82.4%/17.6%	14/3		1	0		long Indel
Intraspecific Variants	T/-	63210	63210	1	17	Indel	70.6%/29.4%	12/5		1	0		long Indel
Intraspecific Variants	A/-	63211	63211	1	17	Indel	70.6%/29.4%	12/5		1	0		long Indel
Intraspecific Variants	A/-	63212	63212	1	17	Indel	70.6%/29.4%	12/5		1	0		long Indel
Intraspecific Variants	T/-	63213	63213	1	17	Indel	70.6%/29.4%	12/5		1	0		long Indel
Intraspecific Variants	A/-	63214	63214	1	17	Indel	70.6%/29.4%	12/5		1	0		long Indel
Intraspecific Variants	C/-	63215	63215	1	17	Indel	70.6%/29.4%	12/5		1	0		long Indel
Intraspecific Variants	A/-	63216	63216	1	17	Indel	70.6%/29.4%	12/5		1	0		long Indel
Intraspecific Variants	A/-	63217	63217	1	17	Indel	70.6%/29.4%	12/5		1	0		long Indel
Intraspecific Variants	T/-	63218	63218	1	17	Indel	70.6%/29.4%	12/5		1	0		long Indel
Intraspecific Variants	T/-	63219	63219	1	17	Indel	70.6%/29.4%	12/5		1	0		long Indel
Intraspecific Variants	C/-	63220	63220	1	17	Indel	70.6%/29.4%	12/5		1	0		long Indel
Intraspecific Variants	A/-	63221	63221	1	17	Indel	70.6%/29.4%	12/5		1	0		long Indel
Intraspecific Variants	A/-	63222	63222	1	17	Indel	70.6%/29.4%	12/5		1	0		long Indel
Intraspecific Variants	T/-	63223	63223	1	17	Indel	70.6%/29.4%	12/5		1	0		long Indel
Intraspecific Variants	T/-	63224	63224	1	17	Indel	70.6%/29.4%	12/5		1	0		long Indel
Intraspecific Variants	T/-	63225	63225	1	17	Indel	70.6%/29.4%	12/5		1	0		long Indel
Intraspecific Variants	G/-	63226	63226	1	17	Indel	70.6%/29.4%	12/5		1	0		long Indel
Intraspecific Variants	A/-	63227	63227	1	17	Indel	70.6%/29.4%	12/5		1	0		long Indel
Intraspecific Variants	T/-	63228	63228	1	17	Indel	88.2%/11.8%	15/2		1	0		long Indel
Intraspecific Variants	T/-	63229	63229	1	17	Indel	88.2%/11.8%	15/2		1	0		long Indel
Intraspecific Variants	C/-	63230	63230	1	17	Indel	88.2%/11.8%	15/2		1	0		long Indel
Intraspecific Variants	T/-	65252	65252	1	17	Indel	70.6%/29.4%	12/5		1	1		polyA
Intraspecific Variants	T/-	65253	65253	1	17	Indel	70.6%/29.4%	12/5		1	1		polyA
Intraspecific Variants	T/-	65254	65254	1	17	Indel	70.6%/29.4%	12/5		1	1		polyA
Intraspecific Variants	T/-	67706	67706	1	17	Indel	70.6%/29.4%	12/5		1	1		SSR
Intraspecific Variants	A/-	67707	67707	1	17	Indel	70.6%/29.4%	12/5		1	1		SSR
Intraspecific Variants	-/A	68246	68246	1	17	Indel	70.6%/29.4%	12/5		1	0		polyA
Intraspecific Variants	T/-	69685	69685	1	17	Indel	82.4%/17.6%	14/3		1	0		long Indel
Intraspecific Variants	A/-	69686	69686	1	17	Indel	82.4%/17.6%	14/3		1	0		long Indel
Intraspecific Variants	T/-	69687	69687	1	17	Indel	82.4%/17.6%	14/3		1	0		long Indel
Intraspecific Variants	T/-	69688	69688	1	17	Indel	82.4%/17.6%	14/3		1	0		long Indel
Intraspecific Variants	C/-	69689	69689	1	17	Indel	82.4%/17.6%	14/3		1	0		long Indel
Intraspecific Variants	A/-	69690	69690	1	17	Indel	70.6%/29.4%	12/5		1	0		long Indel
Intraspecific Variants	A/-	69691	69691	1	17	Indel	70.6%/29.4%	12/5		1	0		long Indel
Intraspecific Variants	T/-	69692	69692	1	17	Indel	70.6%/29.4%	12/5		1	0		long Indel
Intraspecific Variants	A/-	69693	69693	1	17	Indel	70.6%/29.4%	12/5		1	0		long Indel
Intraspecific Variants	G/-	69694	69694	1	17	Indel	70.6%/29.4%	12/5		1	0		long Indel
Intraspecific Variants	A/-	69695	69695	1	17	Indel	70.6%/29.4%	12/5		1	0		long Indel
Intraspecific Variants	A/-	69696	69696	1	17	Indel	70.6%/29.4%	12/5		1	0		long Indel
Intraspecific Variants	T/-	69697	69697	1	17	Indel	70.6%/29.4%	12/5		1	0		long Indel
Intraspecific Variants	A/-	69698	69698	1	17	Indel	70.6%/29.4%	12/5		1	0		long Indel
Intraspecific Variants	A/-	69699	69699	1	17	Indel	70.6%/29.4%	12/5		1	0		long Indel
Intraspecific Variants	T/-	69700	69700	1	17	Indel	70.6%/29.4%	12/5		1	0		long Indel
Intraspecific Variants	A/-	69701	69701	1	17	Indel	70.6%/29.4%	12/5		1	0		long Indel
Intraspecific Variants	A/-	69702	69702	1	17	Indel	70.6%/29.4%	12/5		1	0		long Indel
Intraspecific Variants	A/-	69703	69703	1	17	Indel	70.6%/29.4%	12/5		1	0		long Indel
Intraspecific Variants	T/-	69704	69704	1	17	Indel	70.6%/29.4%	12/5		1	0		long Indel
Intraspecific Variants	A/-	69705	69705	1	17	Indel	70.6%/29.4%	12/5		1	0		long Indel
Intraspecific Variants	A/-	69706	69706	1	17	Indel	70.6%/29.4%	12/5		1	0		long Indel
Intraspecific Variants	A/-	69707	69707	1	17	Indel	70.6%/29.4%	12/5		1	0		long Indel
Intraspecific Variants	A/-	69708	69708	1	17	Indel	70.6%/29.4%	12/5		1	0		long Indel
Intraspecific Variants	T/-	69709	69709	1	17	Indel	88.2%/11.8%	15/2		1	0		long Indel
Intraspecific Variants	A/-	69710	69710	1	17	Indel	88.2%/11.8%	15/2		1	0		long Indel
Intraspecific Variants	T/-	69711	69711	1	17	Indel	88.2%/11.8%	15/2		1	0		long Indel
Intraspecific Variants	T/-	69712	69712	1	17	Indel	88.2%/11.8%	15/2		1	0		long Indel
Intraspecific Variants	C/-	69713	69713	1	17	Indel	88.2%/11.8%	15/2		1	0		long Indel
Intraspecific Variants	T/-	70381	70381	1	17	Indel	64.7%/35.3%	11/6		1	1		polyA
Intraspecific Variants	T/-	70382	70382	1	17	Indel	64.7%/35.3%	11/6		1	1		polyA
Intraspecific Variants	-/T	71346	71346	1	17	Indel	70.6%/29.4%	12/5		1	1		polyA
Intraspecific Variants	-/A	74065	74065	1	17	Indel	88.2%/11.8%	15/2	psbT	0	1		polyA
Intraspecific Variants	A/-	74066	74066	1	17	Indel	70.6%/29.4%	12/5	psbT	0	1		polyA
Intraspecific Variants	-/T	79473	79473	1	17	Indel	88.2%/11.8%	15/2		0	0		long Indel
Intraspecific Variants	-/T	79474	79474	1	17	Indel	88.2%/11.8%	15/2		0	0		long Indel
Intraspecific Variants	-/C	79475	79475	1	17	Indel	88.2%/11.8%	15/2		0	0		long Indel
Intraspecific Variants	-/T	79476	79476	1	17	Indel	88.2%/11.8%	15/2		0	0		long Indel
Intraspecific Variants	-/T	79477	79477	1	17	Indel	88.2%/11.8%	15/2		0	0		long Indel
Intraspecific Variants	-/G	79478	79478	1	17	Indel	88.2%/11.8%	15/2		0	0		long Indel
Intraspecific Variants	A/-	111903	111903	1	17	Indel	70.6%/29.4%	12/5	ycf1	1	0		long Indel
Intraspecific Variants	T/-	111904	111904	1	17	Indel	70.6%/29.4%	12/5	ycf1	1	0		long Indel
Intraspecific Variants	T/-	111905	111905	1	17	Indel	70.6%/29.4%	12/5	ycf1	1	0		long Indel
Intraspecific Variants	T/-	111906	111906	1	17	Indel	70.6%/29.4%	12/5	ycf1	1	0		long Indel
Intraspecific Variants	G/-	111907	111907	1	17	Indel	70.6%/29.4%	12/5	ycf1	1	0		long Indel
Intraspecific Variants	A/-	111908	111908	1	17	Indel	70.6%/29.4%	12/5	ycf1	1	0		long Indel
Intraspecific Variants	-/A	121628	121628	1	17	Indel	52.9%/47.1%	9/8		0	1		polyA
Intraspecific Variants	A/-	121629	121629	1	17	Indel	94.1%/5.9%	16/1		0	1		polyA
Intraspecific Variants	C/-	122912	122912	1	17	Indel	88.2%/11.8%	15/2		0	0		long Indel
Intraspecific Variants	T/-	122913	122913	1	17	Indel	88.2%/11.8%	15/2		0	0		long Indel
Intraspecific Variants	A/-	122914	122914	1	17	Indel	88.2%/11.8%	15/2		0	0		long Indel
Intraspecific Variants	T/-	122915	122915	1	17	Indel	88.2%/11.8%	15/2		0	0		long Indel
Intraspecific Variants	T/-	122916	122916	1	17	Indel	88.2%/11.8%	15/2		0	0		long Indel
Intraspecific Variants	G/-	122917	122917	1	17	Indel	88.2%/11.8%	15/2		0	0		long Indel
Intraspecific Variants	G/-	122918	122918	1	17	Indel	88.2%/11.8%	15/2		0	0		long Indel
Intraspecific Variants	A/-	122919	122919	1	17	Indel	88.2%/11.8%	15/2		0	0		long Indel
Intraspecific Variants	T/-	122920	122920	1	17	Indel	88.2%/11.8%	15/2		0	0		long Indel
Intraspecific Variants	C/-	122921	122921	1	17	Indel	88.2%/11.8%	15/2		0	0		long Indel
Intraspecific Variants	T/-	122922	122922	1	17	Indel	88.2%/11.8%	15/2		0	0		long Indel
Intraspecific Variants	C/-	122923	122923	1	17	Indel	88.2%/11.8%	15/2		0	0		long Indel
Intraspecific Variants	T/-	122924	122924	1	17	Indel	88.2%/11.8%	15/2		0	0		long Indel
Intraspecific Variants	T/-	122925	122925	1	17	Indel	88.2%/11.8%	15/2		0	0		long Indel
Intraspecific Variants	T/-	122926	122926	1	17	Indel	88.2%/11.8%	15/2		0	0		long Indel
Intraspecific Variants	T/-	122927	122927	1	17	Indel	88.2%/11.8%	15/2		0	0		long Indel
Intraspecific Variants	A/-	122928	122928	1	17	Indel	88.2%/11.8%	15/2		0	0		long Indel
Intraspecific Variants	G/-	122929	122929	1	17	Indel	88.2%/11.8%	15/2		0	0		long Indel
Intraspecific Variants	A/-	122930	122930	1	17	Indel	88.2%/11.8%	15/2		0	0		long Indel
Intraspecific Variants	A/-	122931	122931	1	17	Indel	88.2%/11.8%	15/2		0	0		long Indel
Intraspecific Variants	G/-	122932	122932	1	17	Indel	88.2%/11.8%	15/2		0	0		long Indel
Intraspecific Variants	G/-	122933	122933	1	17	Indel	88.2%/11.8%	15/2		0	0		long Indel
Intraspecific Variants	A/-	122934	122934	1	17	Indel	88.2%/11.8%	15/2		0	0		long Indel
Intraspecific Variants	T/-	122935	122935	1	17	Indel	88.2%/11.8%	15/2		0	0		long Indel
Intraspecific Variants	A/-	123233	123233	1	17	Indel	52.9%/47.1%	9/8		0	1		polyA
Intraspecific Variants	A/-	123242	123242	1	17	Indel	88.2%/11.8%	15/2		0	1		polyA
Intraspecific Variants	-/A/T	123243	123243	1	17	Indel	47.1%/41.2%/11.8%	8/7/2		0	1		polyA
Intraspecific Variants	-/T	123244	123244	1	17	Indel	94.1%/5.9%	16/1		0	1		polyA
Intraspecific Variants	-/T	123245	123245	1	17	Indel	70.6%/29.4%	12/5		0	1		polyA
Intraspecific Variants	-/T	123621	123621	1	17	Indel	70.6%/29.4%	12/5		1	1		polyA
Backmapping data for select Arnica montana samples - all Variants
Variants: Amon_AG.backmapping.sorted - Amon_AG	T	992	992	1	76	SNP (transversion)	3.9%	3
Variants: Amon_AG.backmapping.sorted - Amon_AG	A	14359	14359	1	85	SNP (transversion)	7.1%	6
Variants: Amon_AG.backmapping.sorted - Amon_AG	T	15316	15316	1	85	SNP (transition)	4.7%	4
Variants: Amon_AG.backmapping.sorted - Amon_AG	A	15325	15325	1	80	SNP (transition)	5.0%	4
Variants: Amon_AG.backmapping.sorted - Amon_AG	T	15365	15365	1	80	SNP (transition)	5.0%	4
Variants: Amon_AG.backmapping.sorted - Amon_AG	A	18679	18678	0	80	Insertion (tandem repeat)	6.3%	5
Variants: Amon_AG.backmapping.sorted - Amon_AG	T	20488	20488	1	72	SNP (transition)	4.2%	3
Variants: Amon_AG.backmapping.sorted - Amon_AG	T	25621	25621	1	82	SNP (transition)	14.6%	12
Variants: Amon_AG.backmapping.sorted - Amon_AG	T	25692	25692	1	86	SNP (transversion)	10.5%	9
Variants: Amon_AG.backmapping.sorted - Amon_AG	C	25693	25693	1	86	SNP (transversion)	12.8%	11
Variants: Amon_AG.backmapping.sorted - Amon_AG	C	25695	25695	1	88	SNP (transition)	13.6%	12
Variants: Amon_AG.backmapping.sorted - Amon_AG	T	25769	25769	1	193	SNP (transition)	2.6%	5
Variants: Amon_AG.backmapping.sorted - Amon_AG	A	25771	25771	1	193	SNP (transition)	4.7%	9
Variants: Amon_AG.backmapping.sorted - Amon_AG	G	25776	25776	1	194	SNP (transition)	5.7%	11
Variants: Amon_AG.backmapping.sorted - Amon_AG	A	25793	25793	1	176	SNP (transition)	2.8%	5
Variants: Amon_AG.backmapping.sorted - Amon_AG	A	25799	25799	1	170	SNP (transition)	4.1%	7
Variants: Amon_AG.backmapping.sorted - Amon_AG	T	25809	25809	1	163	SNP (transversion)	18.4%	30
Variants: Amon_AG.backmapping.sorted - Amon_AG	C	25839	25839	1	116	SNP (transition)	5.2%	6
Variants: Amon_AG.backmapping.sorted - Amon_AG	T	26123	26123	1	65	SNP (transition)	7.7%	5
Variants: Amon_AG.backmapping.sorted - Amon_AG	T	27978	27978	1	72	SNP (transition)	4.2%	3
Variants: Amon_AG.backmapping.sorted - Amon_AG	T	28309	28308	0	56	Insertion (tandem repeat)	10.7%	6
Variants: Amon_AG.backmapping.sorted - Amon_AG	G	28501	28501	1	63	SNP (transversion)	27.0%	17
Variants: Amon_AG.backmapping.sorted - Amon_AG	G	29130	29130	1	68	SNP (transition)	4.4%	3
Variants: Amon_AG.backmapping.sorted - Amon_AG	T	30624	30624	1	63	SNP (transversion)	7.9%	5
Variants: Amon_AG.backmapping.sorted - Amon_AG	T	35922	35922	1	66	SNP (transversion)	6.1%	4
Variants: Amon_AG.backmapping.sorted - Amon_AG	C	37382	37382	1	80	SNP (transversion)	23.8%	19
Variants: Amon_AG.backmapping.sorted - Amon_AG	G	41442	41442	1	65	SNP (transversion)	4.6%	3
Variants: Amon_AG.backmapping.sorted - Amon_AG	T	41462	41462	1	66	SNP (transversion)	4.5%	3
Variants: Amon_AG.backmapping.sorted - Amon_AG	T	44863	44863	1	54	SNP (transversion)	5.6%	3
Variants: Amon_AG.backmapping.sorted - Amon_AG	C	50171	50171	1	57	SNP (transversion)	5.3%	3
Variants: Amon_AG.backmapping.sorted - Amon_AG	A	50172	50172	1	57	SNP (transversion)	8.8%	5
Variants: Amon_AG.backmapping.sorted - Amon_AG		50277	50277	1	49	Deletion (tandem repeat)	14.3%	7
Variants: Amon_AG.backmapping.sorted - Amon_AG	T	51625	51625	1	64	SNP (transition)	7.8%	5
Variants: Amon_AG.backmapping.sorted - Amon_AG	A	61290	61290	1	69	SNP (transition)	4.3%	3
Variants: Amon_AG.backmapping.sorted - Amon_AG	A	61342	61341	0	58	Insertion (tandem repeat)	5.2%	3
Variants: Amon_AG.backmapping.sorted - Amon_AG	A	64817	64817	1	70	SNP (transversion)	7.1%	5
Variants: Amon_AG.backmapping.sorted - Amon_AG	T	69047	69047	1	60	SNP (transition)	6.7%	4
Variants: Amon_AG.backmapping.sorted - Amon_AG	A	69079	69079	1	63	SNP (transition)	6.3%	4
Variants: Amon_AG.backmapping.sorted - Amon_AG		71274	71274	1	71	Deletion (tandem repeat)	11.3%	8
Variants: Amon_AG.backmapping.sorted - Amon_AG	A	78408	78408	1	83	SNP (transition)	4.8%	4
Variants: Amon_AG.backmapping.sorted - Amon_AG	T	80463	80463	1	69	SNP (transversion)	7.2%	5
Variants: Amon_AG.backmapping.sorted - Amon_AG	A	80738	80738	1	93	SNP (transition)	5.4%	5
Variants: Amon_AG.backmapping.sorted - Amon_AG	C	83479	83479	1	78	SNP (transversion)	6.4%	5
Variants: Amon_AG.backmapping.sorted - Amon_AG	TCG	83839	83838	0	88	Insertion	10.2%	9
Variants: Amon_AG.backmapping.sorted - Amon_AG	G	111190	111190	1	70	SNP (transversion)	4.3%	3
Variants: Amon_AG.backmapping.sorted - Amon_AG	G	113005	113005	1	70	SNP (transition)	5.7%	4
Variants: Amon_AG.backmapping.sorted - Amon_AG	G	116221	116221	1	56	SNP (transversion)	5.4%	3
Variants: Amon_AG.backmapping.sorted - Amon_AG	T	117338	117338	1	69	SNP (transition)	7.2%	5
Variants: Amon_AG.backmapping.sorted - Amon_AG	C	117421	117421	1	69	SNP (transition)	4.3%	3
Variants: Amon_AG.backmapping.sorted - Amon_AG	C	119804	119804	1	68	SNP (transition)	7.4%	5
Variants: Amon_AG.backmapping.sorted - Amon_AG	T	126786	126786	1	63	SNP (transition)	4.8%	3
Variants: Amon_BB-d.backmapping.sorted - Amon_BB-d	C	734	734	1	127	SNP (transversion)	3.1%	4
Variants: Amon_BB-d.backmapping.sorted - Amon_BB-d	T	755	755	1	130	SNP (transition)	3.8%	5
Variants: Amon_BB-d.backmapping.sorted - Amon_BB-d	T	801	801	1	106	SNP (transversion)	3.8%	4
Variants: Amon_BB-d.backmapping.sorted - Amon_BB-d	A	827	827	1	112	SNP (transversion)	5.4%	6
Variants: Amon_BB-d.backmapping.sorted - Amon_BB-d	A	840	840	1	111	SNP (transition)	5.4%	6
Variants: Amon_BB-d.backmapping.sorted - Amon_BB-d	A	875	875	1	104	SNP (transversion)	6.7%	7
Variants: Amon_BB-d.backmapping.sorted - Amon_BB-d	T	889	889	1	110	SNP (transition)	6.4%	7
Variants: Amon_BB-d.backmapping.sorted - Amon_BB-d	A	909	909	1	107	SNP (transition)	5.6%	6
Variants: Amon_BB-d.backmapping.sorted - Amon_BB-d	A	942	942	1	111	SNP (transition)	4.5%	5
Variants: Amon_BB-d.backmapping.sorted - Amon_BB-d	G	2592	2592	1	151	SNP (transversion)	3.3%	5
Variants: Amon_BB-d.backmapping.sorted - Amon_BB-d	G	2612	2612	1	159	SNP (transversion)	3.1%	5
Variants: Amon_BB-d.backmapping.sorted - Amon_BB-d	A	2711	2711	1	146	SNP (transversion)	6.2%	9
Variants: Amon_BB-d.backmapping.sorted - Amon_BB-d	A	4045	4045	1	133	SNP (transversion)	4.5%	6
Variants: Amon_BB-d.backmapping.sorted - Amon_BB-d	C	4151	4150	0	138	Insertion	5.1%	7
Variants: Amon_BB-d.backmapping.sorted - Amon_BB-d	T	4155	4155	1	142	SNP (transversion)	4.9%	7
Variants: Amon_BB-d.backmapping.sorted - Amon_BB-d	C	4175	4175	1	141	SNP (transversion)	6.4%	9
Variants: Amon_BB-d.backmapping.sorted - Amon_BB-d	C	5156	5156	1	139	SNP (transversion)	5.0%	7
Variants: Amon_BB-d.backmapping.sorted - Amon_BB-d	C	5234	5234	1	139	SNP (transition)	6.5%	9
Variants: Amon_BB-d.backmapping.sorted - Amon_BB-d	T	5254	5254	1	128	SNP (transition)	9.4%	12
Variants: Amon_BB-d.backmapping.sorted - Amon_BB-d	A	5274	5274	1	125	SNP (transition)	8.8%	11
Variants: Amon_BB-d.backmapping.sorted - Amon_BB-d	G	5302	5302	1	123	SNP (transversion)	11.4%	14
Variants: Amon_BB-d.backmapping.sorted - Amon_BB-d	T	5660	5660	1	134	SNP (transversion)	3.0%	4
Variants: Amon_BB-d.backmapping.sorted - Amon_BB-d	C	5902	5902	1	156	SNP (transversion)	5.1%	8
Variants: Amon_BB-d.backmapping.sorted - Amon_BB-d	A	9457	9457	1	109	SNP (transition)	9.2%	10
Variants: Amon_BB-d.backmapping.sorted - Amon_BB-d	T	9542	9542	1	118	SNP (transversion)	5.9%	7
Variants: Amon_BB-d.backmapping.sorted - Amon_BB-d	A	9559	9559	1	120	SNP (transversion)	9.2%	11
Variants: Amon_BB-d.backmapping.sorted - Amon_BB-d	A	9596	9596	1	114	SNP (transition)	8.8%	10
Variants: Amon_BB-d.backmapping.sorted - Amon_BB-d	G	9605	9605	1	117	SNP (transversion)	8.5%	10
Variants: Amon_BB-d.backmapping.sorted - Amon_BB-d	G	9637	9637	1	118	SNP (transversion)	10.2%	12
Variants: Amon_BB-d.backmapping.sorted - Amon_BB-d	C	9647	9647	1	118	SNP (transversion)	9.3%	11
Variants: Amon_BB-d.backmapping.sorted - Amon_BB-d	C	9658	9658	1	113	SNP (transversion)	9.7%	11
Variants: Amon_BB-d.backmapping.sorted - Amon_BB-d	T	9677	9677	1	113	SNP (transversion)	12.4%	14
Variants: Amon_BB-d.backmapping.sorted - Amon_BB-d	C	9686	9686	1	113	SNP (transition)	9.7%	11
Variants: Amon_BB-d.backmapping.sorted - Amon_BB-d	G	10158	10158	1	141	SNP (transition)	7.1%	10
Variants: Amon_BB-d.backmapping.sorted - Amon_BB-d	G	10211	10211	1	144	SNP (transition)	5.6%	8
Variants: Amon_BB-d.backmapping.sorted - Amon_BB-d	A	10214	10214	1	143	SNP (transition)	5.6%	8
Variants: Amon_BB-d.backmapping.sorted - Amon_BB-d	T	10793	10793	1	125	SNP (transition)	8.0%	10
Variants: Amon_BB-d.backmapping.sorted - Amon_BB-d	T	12311	12311	1	125	SNP (transition)	5.6%	7
Variants: Amon_BB-d.backmapping.sorted - Amon_BB-d	A	12339	12339	1	142	SNP (transversion)	5.6%	8
Variants: Amon_BB-d.backmapping.sorted - Amon_BB-d	G	12351	12351	1	148	SNP (transition)	4.7%	7
Variants: Amon_BB-d.backmapping.sorted - Amon_BB-d	G	12452	12452	1	109	SNP (transition)	5.5%	6
Variants: Amon_BB-d.backmapping.sorted - Amon_BB-d	A	12543	12543	1	129	SNP (transition)	7.0%	9
Variants: Amon_BB-d.backmapping.sorted - Amon_BB-d	A	12598	12598	1	143	SNP (transversion)	18.9%	27
Variants: Amon_BB-d.backmapping.sorted - Amon_BB-d	G	12629	12629	1	143	SNP (transversion)	14.7%	21
Variants: Amon_BB-d.backmapping.sorted - Amon_BB-d	T	13223	13223	1	125	SNP (transition)	4.8%	6
Variants: Amon_BB-d.backmapping.sorted - Amon_BB-d	G	13403	13403	1	130	SNP (transition)	6.9%	9
Variants: Amon_BB-d.backmapping.sorted - Amon_BB-d	A	14308	14308	1	114	SNP (transition)	3.5%	4
Variants: Amon_BB-d.backmapping.sorted - Amon_BB-d	A	14330	14330	1	116	SNP (transition)	6.0%	7
Variants: Amon_BB-d.backmapping.sorted - Amon_BB-d	A	14359	14359	1	110	SNP (transversion)	24.5%	27
Variants: Amon_BB-d.backmapping.sorted - Amon_BB-d	A	14366	14366	1	113	SNP (transversion)	8.0%	9
Variants: Amon_BB-d.backmapping.sorted - Amon_BB-d	T	14437	14437	1	123	SNP (transversion)	3.3%	4
Variants: Amon_BB-d.backmapping.sorted - Amon_BB-d	C	14517	14517	1	121	SNP (transition)	5.0%	6
Variants: Amon_BB-d.backmapping.sorted - Amon_BB-d	A	14551	14551	1	109	SNP (transition)	3.7%	4
Variants: Amon_BB-d.backmapping.sorted - Amon_BB-d	A	14788	14788	1	102	SNP (transition)	3.9%	4
Variants: Amon_BB-d.backmapping.sorted - Amon_BB-d	C	15061	15061	1	129	SNP (transversion)	5.4%	7
Variants: Amon_BB-d.backmapping.sorted - Amon_BB-d	T	15415	15415	1	123	SNP (transition)	4.1%	5
Variants: Amon_BB-d.backmapping.sorted - Amon_BB-d	A	15422	15422	1	123	SNP (transition)	3.3%	4
Variants: Amon_BB-d.backmapping.sorted - Amon_BB-d	C	16194	16194	1	109	SNP (transversion)	2.8%	3
Variants: Amon_BB-d.backmapping.sorted - Amon_BB-d	T	16923	16923	1	129	SNP (transition)	3.9%	5
Variants: Amon_BB-d.backmapping.sorted - Amon_BB-d	C	17145	17145	1	131	SNP (transition)	6.1%	8
Variants: Amon_BB-d.backmapping.sorted - Amon_BB-d	T	17211	17211	1	150	SNP (transversion)	4.7%	7
Variants: Amon_BB-d.backmapping.sorted - Amon_BB-d	T	17239	17239	1	137	SNP (transition)	5.8%	8
Variants: Amon_BB-d.backmapping.sorted - Amon_BB-d	A	17958	17958	1	157	SNP (transition)	5.1%	8
Variants: Amon_BB-d.backmapping.sorted - Amon_BB-d	T	18159	18159	1	114	SNP (transition)	7.9%	9
Variants: Amon_BB-d.backmapping.sorted - Amon_BB-d		19282	19282	1	129	Deletion	4.7%	6
Variants: Amon_BB-d.backmapping.sorted - Amon_BB-d	A	19372	19372	1	112	SNP (transversion)	4.5%	5
Variants: Amon_BB-d.backmapping.sorted - Amon_BB-d	A	21616	21616	1	143	SNP (transition)	3.5%	5
Variants: Amon_BB-d.backmapping.sorted - Amon_BB-d	C	21619	21619	1	144	SNP (transition)	13.2%	19
Variants: Amon_BB-d.backmapping.sorted - Amon_BB-d	A	23390	23390	1	120	SNP (transversion)	10.0%	12
Variants: Amon_BB-d.backmapping.sorted - Amon_BB-d	T	23453	23453	1	114	SNP (transition)	7.0%	8
Variants: Amon_BB-d.backmapping.sorted - Amon_BB-d	C	23507	23507	1	119	SNP (transversion)	6.7%	8
Variants: Amon_BB-d.backmapping.sorted - Amon_BB-d	C	23519	23519	1	116	SNP (transversion)	6.9%	8
Variants: Amon_BB-d.backmapping.sorted - Amon_BB-d	G	23542	23542	1	118	SNP (transition)	6.8%	8
Variants: Amon_BB-d.backmapping.sorted - Amon_BB-d	A	23718	23718	1	151	SNP (transversion)	6.6%	10
Variants: Amon_BB-d.backmapping.sorted - Amon_BB-d	G	23745	23745	1	142	SNP (transversion)	5.6%	8
Variants: Amon_BB-d.backmapping.sorted - Amon_BB-d	G	23749	23749	1	144	SNP (transition)	5.6%	8
Variants: Amon_BB-d.backmapping.sorted - Amon_BB-d	T	23796	23796	1	138	SNP (transition)	10.9%	15
Variants: Amon_BB-d.backmapping.sorted - Amon_BB-d	A	23804	23804	1	134	SNP (transition)	9.7%	13
Variants: Amon_BB-d.backmapping.sorted - Amon_BB-d	A	23818	23818	1	129	SNP (transversion)	14.7%	19
Variants: Amon_BB-d.backmapping.sorted - Amon_BB-d	T	23954	23954	1	105	SNP (transition)	5.7%	6
Variants: Amon_BB-d.backmapping.sorted - Amon_BB-d	T	23967	23967	1	104	SNP (transition)	4.8%	5
Variants: Amon_BB-d.backmapping.sorted - Amon_BB-d	T	24038	24038	1	131	SNP (transition)	3.1%	4
Variants: Amon_BB-d.backmapping.sorted - Amon_BB-d	T	25621	25621	1	178	SNP (transition)	15.7%	28
Variants: Amon_BB-d.backmapping.sorted - Amon_BB-d	C	25859	25859	1	155	SNP (transversion)	14.2%	22
Variants: Amon_BB-d.backmapping.sorted - Amon_BB-d	AA	25860	25861	2	154 -> 156	Substitution	9.0% -> 9.1%	14
Variants: Amon_BB-d.backmapping.sorted - Amon_BB-d	A	26302	26302	1	139	SNP (transition)	7.9%	11
Variants: Amon_BB-d.backmapping.sorted - Amon_BB-d	G	26411	26411	1	139	SNP (transversion)	6.5%	9
Variants: Amon_BB-d.backmapping.sorted - Amon_BB-d	T	26441	26441	1	139	SNP (transition)	10.1%	14
Variants: Amon_BB-d.backmapping.sorted - Amon_BB-d	C	26459	26459	1	131	SNP (transition)	6.9%	9
Variants: Amon_BB-d.backmapping.sorted - Amon_BB-d	T	26511	26511	1	119	SNP (transition)	10.1%	12
Variants: Amon_BB-d.backmapping.sorted - Amon_BB-d	A	26551	26551	1	118	SNP (transversion)	8.5%	10
Variants: Amon_BB-d.backmapping.sorted - Amon_BB-d	T	27165	27165	1	115	SNP (transversion)	12.2%	14
Variants: Amon_BB-d.backmapping.sorted - Amon_BB-d	G	27174	27174	1	111	SNP (transition)	13.5%	15
Variants: Amon_BB-d.backmapping.sorted - Amon_BB-d	T	27207	27207	1	119	SNP (transition)	11.8%	14
Variants: Amon_BB-d.backmapping.sorted - Amon_BB-d	C	27286	27286	1	134	SNP (transversion)	6.0%	8
Variants: Amon_BB-d.backmapping.sorted - Amon_BB-d	T	27896	27896	1	132	SNP (transversion)	5.3%	7
Variants: Amon_BB-d.backmapping.sorted - Amon_BB-d	T	27927	27927	1	124	SNP (transversion)	5.6%	7
Variants: Amon_BB-d.backmapping.sorted - Amon_BB-d	TGA	27939	27941	2	118 -> 119	Substitution	5.9%	7
Variants: Amon_BB-d.backmapping.sorted - Amon_BB-d	A	27946	27946	1	116	SNP (transversion)	6.0%	7
Variants: Amon_BB-d.backmapping.sorted - Amon_BB-d	T	27966	27966	1	116	SNP (transition)	6.0%	7
Variants: Amon_BB-d.backmapping.sorted - Amon_BB-d	T	27997	27997	1	113	SNP (transition)	8.0%	9
Variants: Amon_BB-d.backmapping.sorted - Amon_BB-d	A	28466	28466	1	145	SNP (transition)	11.7%	17
Variants: Amon_BB-d.backmapping.sorted - Amon_BB-d	G	28509	28509	1	157	SNP (transversion)	12.1%	19
Variants: Amon_BB-d.backmapping.sorted - Amon_BB-d	T	28557	28557	1	159	SNP (transition)	4.4%	7
Variants: Amon_BB-d.backmapping.sorted - Amon_BB-d	A	28574	28574	1	164	SNP (transversion)	12.8%	21
Variants: Amon_BB-d.backmapping.sorted - Amon_BB-d	T	28592	28592	1	167	SNP (transition)	15.0%	25
Variants: Amon_BB-d.backmapping.sorted - Amon_BB-d	T	28608	28608	1	171	SNP (transversion)	13.5%	23
Variants: Amon_BB-d.backmapping.sorted - Amon_BB-d	G	28644	28644	1	158	SNP (transversion)	22.2%	35
Variants: Amon_BB-d.backmapping.sorted - Amon_BB-d	C	28835	28835	1	135	SNP (transversion)	4.4%	6
Variants: Amon_BB-d.backmapping.sorted - Amon_BB-d	G	28841	28841	1	134	SNP (transversion)	4.5%	6
Variants: Amon_BB-d.backmapping.sorted - Amon_BB-d	T	29031	29031	1	148	SNP (transition)	7.4%	11
Variants: Amon_BB-d.backmapping.sorted - Amon_BB-d	T	29049	29049	1	144	SNP (transition)	7.6%	11
Variants: Amon_BB-d.backmapping.sorted - Amon_BB-d	G	29247	29247	1	138	SNP (transition)	6.5%	9
Variants: Amon_BB-d.backmapping.sorted - Amon_BB-d	A	29252	29252	1	139	SNP (transition)	6.5%	9
Variants: Amon_BB-d.backmapping.sorted - Amon_BB-d	A	29320	29320	1	126	SNP (transition)	7.9%	10
Variants: Amon_BB-d.backmapping.sorted - Amon_BB-d	TTT	29393	29395	2	129 -> 140	Substitution	9.3%	12 -> 13
Variants: Amon_BB-d.backmapping.sorted - Amon_BB-d	A	29405	29405	1	143	SNP (transition)	10.5%	15
Variants: Amon_BB-d.backmapping.sorted - Amon_BB-d	A	29522	29522	1	167	SNP (transition)	2.4%	4
Variants: Amon_BB-d.backmapping.sorted - Amon_BB-d	T	29638	29638	1	149	SNP (transversion)	6.0%	9
Variants: Amon_BB-d.backmapping.sorted - Amon_BB-d	T	29650	29650	1	161	SNP (transversion)	16.8%	27
Variants: Amon_BB-d.backmapping.sorted - Amon_BB-d	G	29774	29774	1	145	SNP (transition)	2.8%	4
Variants: Amon_BB-d.backmapping.sorted - Amon_BB-d	T	30593	30593	1	129	SNP (transition)	5.4%	7
Variants: Amon_BB-d.backmapping.sorted - Amon_BB-d	T	30624	30624	1	139	SNP (transversion)	18.0%	25
Variants: Amon_BB-d.backmapping.sorted - Amon_BB-d	G	30756	30756	1	135	SNP (transversion)	13.3%	18
Variants: Amon_BB-d.backmapping.sorted - Amon_BB-d	A	30811	30811	1	145	SNP (transition)	11.0%	16
Variants: Amon_BB-d.backmapping.sorted - Amon_BB-d	A	30823	30823	1	145	SNP (transversion)	10.3%	15
Variants: Amon_BB-d.backmapping.sorted - Amon_BB-d	C	31520	31520	1	121	SNP (transversion)	5.8%	7
Variants: Amon_BB-d.backmapping.sorted - Amon_BB-d	C	33282	33282	1	127	SNP (transition)	4.7%	6
Variants: Amon_BB-d.backmapping.sorted - Amon_BB-d	A	33304	33304	1	114	SNP (transition)	6.1%	7
Variants: Amon_BB-d.backmapping.sorted - Amon_BB-d	T	33326	33326	1	117	SNP (transition)	6.8%	8
Variants: Amon_BB-d.backmapping.sorted - Amon_BB-d	C	33361	33361	1	111	SNP (transition)	9.0%	10
Variants: Amon_BB-d.backmapping.sorted - Amon_BB-d	G	33366	33366	1	110	SNP (transversion)	8.2%	9
Variants: Amon_BB-d.backmapping.sorted - Amon_BB-d	A	33384	33384	1	101	SNP (transition)	8.9%	9
Variants: Amon_BB-d.backmapping.sorted - Amon_BB-d	C	33425	33425	1	98	SNP (transversion)	28.6%	28
Variants: Amon_BB-d.backmapping.sorted - Amon_BB-d	G	33473	33473	1	113	SNP (transversion)	6.2%	7
Variants: Amon_BB-d.backmapping.sorted - Amon_BB-d	A	33499	33499	1	127	SNP (transversion)	7.1%	9
Variants: Amon_BB-d.backmapping.sorted - Amon_BB-d	C	33525	33525	1	132	SNP (transition)	5.3%	7
Variants: Amon_BB-d.backmapping.sorted - Amon_BB-d	A	33565	33565	1	122	SNP (transition)	7.4%	9
Variants: Amon_BB-d.backmapping.sorted - Amon_BB-d	A	34258	34258	1	132	SNP (transition)	4.5%	6
Variants: Amon_BB-d.backmapping.sorted - Amon_BB-d	G	34341	34341	1	128	SNP (transversion)	3.1%	4
Variants: Amon_BB-d.backmapping.sorted - Amon_BB-d	C	34658	34658	1	129	SNP (transition)	3.1%	4
Variants: Amon_BB-d.backmapping.sorted - Amon_BB-d	T	34688	34688	1	110	SNP (transition)	5.5%	6
Variants: Amon_BB-d.backmapping.sorted - Amon_BB-d	C	35626	35626	1	144	SNP (transition)	6.9%	10
Variants: Amon_BB-d.backmapping.sorted - Amon_BB-d	G	35626	35626	1	144	SNP (transversion)	3.5%	5
Variants: Amon_BB-d.backmapping.sorted - Amon_BB-d	T	35646	35646	1	125	SNP (transversion)	4.0%	5
Variants: Amon_BB-d.backmapping.sorted - Amon_BB-d	T	35647	35647	1	124	SNP (transition)	7.3%	9
Variants: Amon_BB-d.backmapping.sorted - Amon_BB-d	G	35656	35656	1	129	SNP (transition)	12.4%	16
Variants: Amon_BB-d.backmapping.sorted - Amon_BB-d	G	35736	35736	1	140	SNP (transition)	4.3%	6
Variants: Amon_BB-d.backmapping.sorted - Amon_BB-d	C	36013	36013	1	88	SNP (transition)	4.5%	4
Variants: Amon_BB-d.backmapping.sorted - Amon_BB-d	A	36573	36573	1	89	SNP (transversion)	3.4%	3
Variants: Amon_BB-d.backmapping.sorted - Amon_BB-d	A	36704	36704	1	109	SNP (transition)	5.5%	6
Variants: Amon_BB-d.backmapping.sorted - Amon_BB-d	T	37406	37406	1	100	SNP (transition)	5.0%	5
Variants: Amon_BB-d.backmapping.sorted - Amon_BB-d	T	37413	37413	1	97	SNP (transition)	5.2%	5
Variants: Amon_BB-d.backmapping.sorted - Amon_BB-d	G	38002	38002	1	132	SNP (transition)	3.8%	5
Variants: Amon_BB-d.backmapping.sorted - Amon_BB-d	C	38004	38004	1	134	SNP (transition)	5.2%	7
Variants: Amon_BB-d.backmapping.sorted - Amon_BB-d	A	38031	38031	1	132	SNP (transition)	5.3%	7
Variants: Amon_BB-d.backmapping.sorted - Amon_BB-d	A	38060	38060	1	137	SNP (transition)	4.4%	6
Variants: Amon_BB-d.backmapping.sorted - Amon_BB-d	G	38087	38087	1	134	SNP (transition)	4.5%	6
Variants: Amon_BB-d.backmapping.sorted - Amon_BB-d	T	38260	38260	1	114	SNP (transition)	5.3%	6
Variants: Amon_BB-d.backmapping.sorted - Amon_BB-d	A	38279	38279	1	122	SNP (transversion)	4.1%	5
Variants: Amon_BB-d.backmapping.sorted - Amon_BB-d	C	38564	38564	1	135	SNP (transversion)	8.1%	11
Variants: Amon_BB-d.backmapping.sorted - Amon_BB-d	C	39312	39312	1	122	SNP (transition)	4.9%	6
Variants: Amon_BB-d.backmapping.sorted - Amon_BB-d	A	39332	39332	1	118	SNP (transition)	5.1%	6
Variants: Amon_BB-d.backmapping.sorted - Amon_BB-d	A	39407	39407	1	117	SNP (transition)	6.8%	8
Variants: Amon_BB-d.backmapping.sorted - Amon_BB-d	T	39452	39452	1	120	SNP (transition)	7.5%	9
Variants: Amon_BB-d.backmapping.sorted - Amon_BB-d	G	39477	39477	1	124	SNP (transition)	12.1%	15
Variants: Amon_BB-d.backmapping.sorted - Amon_BB-d	C	39499	39499	1	125	SNP (transition)	7.2%	9
Variants: Amon_BB-d.backmapping.sorted - Amon_BB-d	T	39535	39535	1	128	SNP (transition)	7.8%	10
Variants: Amon_BB-d.backmapping.sorted - Amon_BB-d	A	39537	39537	1	130	SNP (transition)	8.5%	11
Variants: Amon_BB-d.backmapping.sorted - Amon_BB-d	A	40251	40251	1	118	SNP (transition)	10.2%	12
Variants: Amon_BB-d.backmapping.sorted - Amon_BB-d	G	40329	40329	1	125	SNP (transition)	7.2%	9
Variants: Amon_BB-d.backmapping.sorted - Amon_BB-d	A	40333	40333	1	123	SNP (transversion)	7.3%	9
Variants: Amon_BB-d.backmapping.sorted - Amon_BB-d	T	40692	40692	1	122	SNP (transversion)	7.4%	9
Variants: Amon_BB-d.backmapping.sorted - Amon_BB-d	A	40714	40714	1	132	SNP (transversion)	9.8%	13
Variants: Amon_BB-d.backmapping.sorted - Amon_BB-d	C	41388	41388	1	125	SNP (transition)	6.4%	8
Variants: Amon_BB-d.backmapping.sorted - Amon_BB-d	A	41461	41461	1	140	SNP (transversion)	5.0%	7
Variants: Amon_BB-d.backmapping.sorted - Amon_BB-d	T	41487	41487	1	135	SNP (transition)	5.2%	7
Variants: Amon_BB-d.backmapping.sorted - Amon_BB-d	A	41538	41538	1	130	SNP (transversion)	6.9%	9
Variants: Amon_BB-d.backmapping.sorted - Amon_BB-d	A	41540	41540	1	128	SNP (transition)	7.0%	9
Variants: Amon_BB-d.backmapping.sorted - Amon_BB-d	A	41566	41566	1	127	SNP (transition)	9.4%	12
Variants: Amon_BB-d.backmapping.sorted - Amon_BB-d	T	41595	41595	1	123	SNP (transition)	8.1%	10
Variants: Amon_BB-d.backmapping.sorted - Amon_BB-d	A	42600	42600	1	134	SNP (transversion)	4.5%	6
Variants: Amon_BB-d.backmapping.sorted - Amon_BB-d	T	42657	42657	1	120	SNP (transversion)	18.3%	22
Variants: Amon_BB-d.backmapping.sorted - Amon_BB-d	G	42865	42865	1	119	SNP (transversion)	5.0%	6
Variants: Amon_BB-d.backmapping.sorted - Amon_BB-d	T	42923	42923	1	140	SNP (transition)	4.3%	6
Variants: Amon_BB-d.backmapping.sorted - Amon_BB-d	A	43048	43048	1	134	SNP (transversion)	3.0%	4
Variants: Amon_BB-d.backmapping.sorted - Amon_BB-d	G	43500	43500	1	109	SNP (transition)	4.6%	5
Variants: Amon_BB-d.backmapping.sorted - Amon_BB-d	T	43732	43732	1	122	SNP (transversion)	8.2%	10
Variants: Amon_BB-d.backmapping.sorted - Amon_BB-d	T	44611	44611	1	131	SNP (transition)	11.5%	15
Variants: Amon_BB-d.backmapping.sorted - Amon_BB-d	A	45832	45832	1	127	SNP (transition)	5.5%	7
Variants: Amon_BB-d.backmapping.sorted - Amon_BB-d	A	45855	45855	1	110	SNP (transition)	6.4%	7
Variants: Amon_BB-d.backmapping.sorted - Amon_BB-d	T	45884	45884	1	109	SNP (transition)	6.4%	7
Variants: Amon_BB-d.backmapping.sorted - Amon_BB-d	G	46367	46367	1	112	SNP (transition)	10.7%	12
Variants: Amon_BB-d.backmapping.sorted - Amon_BB-d	G	46418	46418	1	118	SNP (transition)	14.4%	17
Variants: Amon_BB-d.backmapping.sorted - Amon_BB-d	G	46483	46483	1	126	SNP (transition)	6.3%	8
Variants: Amon_BB-d.backmapping.sorted - Amon_BB-d	A	46925	46925	1	147	SNP (transition)	2.7%	4
Variants: Amon_BB-d.backmapping.sorted - Amon_BB-d	T	46949	46949	1	147	SNP (transition)	3.4%	5
Variants: Amon_BB-d.backmapping.sorted - Amon_BB-d	G	48300	48300	1	140	SNP (transition)	3.6%	5
Variants: Amon_BB-d.backmapping.sorted - Amon_BB-d	A	48420	48420	1	119	SNP (transversion)	5.9%	7
Variants: Amon_BB-d.backmapping.sorted - Amon_BB-d	C	48744	48744	1	130	SNP (transversion)	3.1%	4
Variants: Amon_BB-d.backmapping.sorted - Amon_BB-d	C	49531	49531	1	141	SNP (transition)	3.5%	5
Variants: Amon_BB-d.backmapping.sorted - Amon_BB-d	G	49605	49605	1	123	SNP (transition)	13.0%	16
Variants: Amon_BB-d.backmapping.sorted - Amon_BB-d	T	49668	49668	1	125	SNP (transition)	5.6%	7
Variants: Amon_BB-d.backmapping.sorted - Amon_BB-d	A	49684	49684	1	125	SNP (transversion)	5.6%	7
Variants: Amon_BB-d.backmapping.sorted - Amon_BB-d	A	49701	49701	1	132	SNP (transversion)	6.1%	8
Variants: Amon_BB-d.backmapping.sorted - Amon_BB-d	T	50294	50294	1	216	SNP (transition)	13.9%	30
Variants: Amon_BB-d.backmapping.sorted - Amon_BB-d	T	50369	50369	1	240	SNP (transition)	17.1%	41
Variants: Amon_BB-d.backmapping.sorted - Amon_BB-d	T	50402	50402	1	254	SNP (transversion)	16.9%	43
Variants: Amon_BB-d.backmapping.sorted - Amon_BB-d	T	50412	50412	1	219	SNP (transversion)	12.8%	28
Variants: Amon_BB-d.backmapping.sorted - Amon_BB-d	A	51083	51083	1	115	SNP (transversion)	6.1%	7
Variants: Amon_BB-d.backmapping.sorted - Amon_BB-d	G	51998	51998	1	134	SNP (transversion)	3.0%	4
Variants: Amon_BB-d.backmapping.sorted - Amon_BB-d	T	52076	52076	1	135	SNP (transition)	4.4%	6
Variants: Amon_BB-d.backmapping.sorted - Amon_BB-d	T	52087	52087	1	137	SNP (transversion)	5.8%	8
Variants: Amon_BB-d.backmapping.sorted - Amon_BB-d	C	52105	52105	1	136	SNP (transition)	5.9%	8
Variants: Amon_BB-d.backmapping.sorted - Amon_BB-d	C	52158	52158	1	117	SNP (transition)	4.3%	5
Variants: Amon_BB-d.backmapping.sorted - Amon_BB-d	T	52205	52205	1	125	SNP (transversion)	8.0%	10
Variants: Amon_BB-d.backmapping.sorted - Amon_BB-d	G	52225	52225	1	124	SNP (transition)	8.1%	10
Variants: Amon_BB-d.backmapping.sorted - Amon_BB-d	T	52262	52262	1	130	SNP (transition)	8.5%	11
Variants: Amon_BB-d.backmapping.sorted - Amon_BB-d	T	52295	52295	1	140	SNP (transition)	7.9%	11
Variants: Amon_BB-d.backmapping.sorted - Amon_BB-d	G	52322	52322	1	142	SNP (transition)	5.6%	8
Variants: Amon_BB-d.backmapping.sorted - Amon_BB-d	G	52699	52699	1	116	SNP (transversion)	3.4%	4
Variants: Amon_BB-d.backmapping.sorted - Amon_BB-d	T	54191	54191	1	105	SNP (transversion)	6.7%	7
Variants: Amon_BB-d.backmapping.sorted - Amon_BB-d	C	54450	54450	1	137	SNP (transition)	5.1%	7
Variants: Amon_BB-d.backmapping.sorted - Amon_BB-d	T	54477	54477	1	148	SNP (transversion)	6.1%	9
Variants: Amon_BB-d.backmapping.sorted - Amon_BB-d	C	54500	54500	1	140	SNP (transversion)	5.7%	8
Variants: Amon_BB-d.backmapping.sorted - Amon_BB-d	T	54565	54565	1	122	SNP (transversion)	5.7%	7
Variants: Amon_BB-d.backmapping.sorted - Amon_BB-d	A	54960	54960	1	118	SNP (transition)	5.1%	6
Variants: Amon_BB-d.backmapping.sorted - Amon_BB-d	A	54985	54985	1	117	SNP (transversion)	13.7%	16
Variants: Amon_BB-d.backmapping.sorted - Amon_BB-d	G	55001	55001	1	117	SNP (transition)	18.8%	22
Variants: Amon_BB-d.backmapping.sorted - Amon_BB-d	A	55091	55091	1	113	SNP (transition)	11.5%	13
Variants: Amon_BB-d.backmapping.sorted - Amon_BB-d	A	55706	55706	1	117	SNP (transition)	10.3%	12
Variants: Amon_BB-d.backmapping.sorted - Amon_BB-d	T	56776	56776	1	148	SNP (transversion)	2.7%	4
Variants: Amon_BB-d.backmapping.sorted - Amon_BB-d	C	56969	56969	1	127	SNP (transversion)	3.9%	5
Variants: Amon_BB-d.backmapping.sorted - Amon_BB-d	T	57097	57096	0	136	Insertion (tandem repeat)	2.9%	4
Variants: Amon_BB-d.backmapping.sorted - Amon_BB-d	G	57974	57974	1	133	SNP (transition)	9.0%	12
Variants: Amon_BB-d.backmapping.sorted - Amon_BB-d	C	58036	58036	1	136	SNP (transversion)	8.8%	12
Variants: Amon_BB-d.backmapping.sorted - Amon_BB-d	C	58046	58046	1	133	SNP (transition)	8.3%	11
Variants: Amon_BB-d.backmapping.sorted - Amon_BB-d	A	58076	58076	1	143	SNP (transition)	4.9%	7
Variants: Amon_BB-d.backmapping.sorted - Amon_BB-d	T	58142	58142	1	136	SNP (transversion)	5.9%	8
Variants: Amon_BB-d.backmapping.sorted - Amon_BB-d	T	59306	59306	1	132	SNP (transition)	4.5%	6
Variants: Amon_BB-d.backmapping.sorted - Amon_BB-d	A	59809	59809	1	109	SNP (transition)	6.4%	7
Variants: Amon_BB-d.backmapping.sorted - Amon_BB-d	T	59845	59845	1	110	SNP (transition)	8.2%	9
Variants: Amon_BB-d.backmapping.sorted - Amon_BB-d	A	60632	60632	1	118	SNP (transition)	8.5%	10
Variants: Amon_BB-d.backmapping.sorted - Amon_BB-d	T	60666	60666	1	126	SNP (transversion)	7.1%	9
Variants: Amon_BB-d.backmapping.sorted - Amon_BB-d	A	60687	60687	1	134	SNP (transversion)	6.0%	8
Variants: Amon_BB-d.backmapping.sorted - Amon_BB-d	T	61333	61333	1	141	SNP (transition)	5.7%	8
Variants: Amon_BB-d.backmapping.sorted - Amon_BB-d	A	61498	61498	1	139	SNP (transition)	5.8%	8
Variants: Amon_BB-d.backmapping.sorted - Amon_BB-d	G	61516	61516	1	132	SNP (transversion)	6.1%	8
Variants: Amon_BB-d.backmapping.sorted - Amon_BB-d	C	61521	61521	1	135	SNP (transversion)	6.7%	9
Variants: Amon_BB-d.backmapping.sorted - Amon_BB-d	T	61536	61536	1	133	SNP (transversion)	6.8%	9
Variants: Amon_BB-d.backmapping.sorted - Amon_BB-d	C	61565	61565	1	125	SNP (transition)	8.8%	11
Variants: Amon_BB-d.backmapping.sorted - Amon_BB-d	A	61577	61577	1	121	SNP (transition)	8.3%	10
Variants: Amon_BB-d.backmapping.sorted - Amon_BB-d	T	61597	61597	1	126	SNP (transversion)	8.7%	11
Variants: Amon_BB-d.backmapping.sorted - Amon_BB-d	C	61698	61698	1	121	SNP (transversion)	12.4%	15
Variants: Amon_BB-d.backmapping.sorted - Amon_BB-d	T	61741	61741	1	118	SNP (transition)	5.9%	7
Variants: Amon_BB-d.backmapping.sorted - Amon_BB-d	T	61796	61796	1	121	SNP (transversion)	5.0%	6
Variants: Amon_BB-d.backmapping.sorted - Amon_BB-d	T	61900	61900	1	129	SNP (transition)	3.1%	4
Variants: Amon_BB-d.backmapping.sorted - Amon_BB-d	T	61953	61953	1	142	SNP (transition)	2.8%	4
Variants: Amon_BB-d.backmapping.sorted - Amon_BB-d	A	62524	62524	1	139	SNP (transition)	10.1%	14
Variants: Amon_BB-d.backmapping.sorted - Amon_BB-d	T	62562	62562	1	140	SNP (transversion)	3.6%	5
Variants: Amon_BB-d.backmapping.sorted - Amon_BB-d	T	62602	62602	1	128	SNP (transition)	3.9%	5
Variants: Amon_BB-d.backmapping.sorted - Amon_BB-d	A	62766	62766	1	109	SNP (transition)	4.6%	5
Variants: Amon_BB-d.backmapping.sorted - Amon_BB-d	A	63963	63963	1	121	SNP (transition)	5.0%	6
Variants: Amon_BB-d.backmapping.sorted - Amon_BB-d	T	64020	64020	1	123	SNP (transition)	4.9%	6
Variants: Amon_BB-d.backmapping.sorted - Amon_BB-d	G	64351	64351	1	121	SNP (transversion)	4.1%	5
Variants: Amon_BB-d.backmapping.sorted - Amon_BB-d	C	64663	64663	1	124	SNP (transversion)	13.7%	17
Variants: Amon_BB-d.backmapping.sorted - Amon_BB-d	A	64782	64782	1	167	SNP (transition)	7.8%	13
Variants: Amon_BB-d.backmapping.sorted - Amon_BB-d	A	64817	64817	1	176	SNP (transversion)	13.1%	23
Variants: Amon_BB-d.backmapping.sorted - Amon_BB-d	T	64963	64963	1	138	SNP (transversion)	3.6%	5
Variants: Amon_BB-d.backmapping.sorted - Amon_BB-d	A	65362	65362	1	158	SNP (transversion)	12.7%	20
Variants: Amon_BB-d.backmapping.sorted - Amon_BB-d	A	65442	65442	1	164	SNP (transition)	5.5%	9
Variants: Amon_BB-d.backmapping.sorted - Amon_BB-d	T	65469	65469	1	144	SNP (transition)	5.6%	8
Variants: Amon_BB-d.backmapping.sorted - Amon_BB-d	C	65550	65550	1	148	SNP (transition)	4.7%	7
Variants: Amon_BB-d.backmapping.sorted - Amon_BB-d	T	65573	65573	1	139	SNP (transition)	5.0%	7
Variants: Amon_BB-d.backmapping.sorted - Amon_BB-d	A	65573	65573	1	139	SNP (transversion)	3.6%	5
Variants: Amon_BB-d.backmapping.sorted - Amon_BB-d	T	65601	65601	1	151	SNP (transition)	3.3%	5
Variants: Amon_BB-d.backmapping.sorted - Amon_BB-d	C	65608	65608	1	146	SNP (transition)	5.5%	8
Variants: Amon_BB-d.backmapping.sorted - Amon_BB-d	A	65635	65635	1	139	SNP (transition)	3.6%	5
Variants: Amon_BB-d.backmapping.sorted - Amon_BB-d	T	65650	65650	1	137	SNP (transition)	4.4%	6
Variants: Amon_BB-d.backmapping.sorted - Amon_BB-d	T	65659	65659	1	136	SNP (transversion)	2.9%	4
Variants: Amon_BB-d.backmapping.sorted - Amon_BB-d	A	65660	65660	1	136	SNP (transversion)	4.4%	6
Variants: Amon_BB-d.backmapping.sorted - Amon_BB-d	T	66146	66146	1	124	SNP (transversion)	18.5%	23
Variants: Amon_BB-d.backmapping.sorted - Amon_BB-d	G	66153	66153	1	123	SNP (transition)	19.5%	24
Variants: Amon_BB-d.backmapping.sorted - Amon_BB-d	T	66192	66192	1	125	SNP (transition)	4.0%	5
Variants: Amon_BB-d.backmapping.sorted - Amon_BB-d	T	66212	66212	1	130	SNP (transition)	4.6%	6
Variants: Amon_BB-d.backmapping.sorted - Amon_BB-d	A	66259	66259	1	115	SNP (transversion)	2.6%	3
Variants: Amon_BB-d.backmapping.sorted - Amon_BB-d	A	66322	66322	1	114	SNP (transition)	4.4%	5
Variants: Amon_BB-d.backmapping.sorted - Amon_BB-d	C	66611	66611	1	129	SNP (transition)	6.2%	8
Variants: Amon_BB-d.backmapping.sorted - Amon_BB-d	A	66625	66625	1	120	SNP (transversion)	7.5%	9
Variants: Amon_BB-d.backmapping.sorted - Amon_BB-d	A	66645	66645	1	122	SNP (transversion)	7.4%	9
Variants: Amon_BB-d.backmapping.sorted - Amon_BB-d	C	66676	66676	1	129	SNP (transversion)	5.4%	7
Variants: Amon_BB-d.backmapping.sorted - Amon_BB-d	C	66687	66687	1	128	SNP (transition)	5.5%	7
Variants: Amon_BB-d.backmapping.sorted - Amon_BB-d	C	66754	66754	1	129	SNP (transition)	4.7%	6
Variants: Amon_BB-d.backmapping.sorted - Amon_BB-d	T	66976	66976	1	135	SNP (transversion)	12.6%	17
Variants: Amon_BB-d.backmapping.sorted - Amon_BB-d	G	67010	67010	1	145	SNP (transversion)	11.0%	16
Variants: Amon_BB-d.backmapping.sorted - Amon_BB-d	C	67033	67032	0	133	Insertion (tandem repeat)	10.5%	14
Variants: Amon_BB-d.backmapping.sorted - Amon_BB-d	G	67045	67045	1	125	SNP (transition)	12.0%	15
Variants: Amon_BB-d.backmapping.sorted - Amon_BB-d	T	67070	67070	1	130	SNP (transversion)	10.8%	14
Variants: Amon_BB-d.backmapping.sorted - Amon_BB-d	A	67087	67087	1	142	SNP (transition)	9.9%	14
Variants: Amon_BB-d.backmapping.sorted - Amon_BB-d	A	67096	67096	1	148	SNP (transition)	8.8%	13
Variants: Amon_BB-d.backmapping.sorted - Amon_BB-d	T	67112	67112	1	149	SNP (transversion)	14.8%	22
Variants: Amon_BB-d.backmapping.sorted - Amon_BB-d	T	67211	67211	1	155	SNP (transversion)	7.1%	11
Variants: Amon_BB-d.backmapping.sorted - Amon_BB-d	A	67253	67253	1	137	SNP (transversion)	4.4%	6
Variants: Amon_BB-d.backmapping.sorted - Amon_BB-d	A	67279	67279	1	143	SNP (transversion)	4.9%	7
Variants: Amon_BB-d.backmapping.sorted - Amon_BB-d	A	67426	67426	1	126	SNP (transition)	4.8%	6
Variants: Amon_BB-d.backmapping.sorted - Amon_BB-d	T	68327	68327	1	134	SNP (transition)	6.7%	9
Variants: Amon_BB-d.backmapping.sorted - Amon_BB-d	T	68430	68430	1	120	SNP (transition)	5.8%	7
Variants: Amon_BB-d.backmapping.sorted - Amon_BB-d	T	68788	68788	1	128	SNP (transition)	4.7%	6
Variants: Amon_BB-d.backmapping.sorted - Amon_BB-d	T	68800	68800	1	125	SNP (transversion)	4.8%	6
Variants: Amon_BB-d.backmapping.sorted - Amon_BB-d	G	68908	68908	1	128	SNP (transition)	7.0%	9
Variants: Amon_BB-d.backmapping.sorted - Amon_BB-d	A	70001	70001	1	112	SNP (transition)	8.0%	9
Variants: Amon_BB-d.backmapping.sorted - Amon_BB-d	G	70036	70036	1	126	SNP (transition)	7.9%	10
Variants: Amon_BB-d.backmapping.sorted - Amon_BB-d	A	70064	70064	1	124	SNP (transition)	8.9%	11
Variants: Amon_BB-d.backmapping.sorted - Amon_BB-d	A	70100	70100	1	131	SNP (transition)	8.4%	11
Variants: Amon_BB-d.backmapping.sorted - Amon_BB-d	A	70969	70969	1	131	SNP (transversion)	7.6%	10
Variants: Amon_BB-d.backmapping.sorted - Amon_BB-d	C	71041	71041	1	134	SNP (transition)	3.7%	5
Variants: Amon_BB-d.backmapping.sorted - Amon_BB-d	T	71069	71069	1	143	SNP (transversion)	3.5%	5
Variants: Amon_BB-d.backmapping.sorted - Amon_BB-d	A	71117	71117	1	138	SNP (transition)	2.9%	4
Variants: Amon_BB-d.backmapping.sorted - Amon_BB-d	G	72199	72199	1	134	SNP (transversion)	5.2%	7
Variants: Amon_BB-d.backmapping.sorted - Amon_BB-d	T	72700	72700	1	129	SNP (transition)	3.1%	4
Variants: Amon_BB-d.backmapping.sorted - Amon_BB-d	A	74257	74257	1	131	SNP (transition)	3.1%	4
Variants: Amon_BB-d.backmapping.sorted - Amon_BB-d	C	74265	74265	1	131	SNP (transition)	6.1%	8
Variants: Amon_BB-d.backmapping.sorted - Amon_BB-d	A	74508	74508	1	113	SNP (transition)	4.4%	5
Variants: Amon_BB-d.backmapping.sorted - Amon_BB-d	A	75316	75316	1	105	SNP (transversion)	7.6%	8
Variants: Amon_BB-d.backmapping.sorted - Amon_BB-d	T	75326	75326	1	104	SNP (transversion)	18.3%	19
Variants: Amon_BB-d.backmapping.sorted - Amon_BB-d	T	75347	75347	1	104	SNP (transversion)	12.5%	13
Variants: Amon_BB-d.backmapping.sorted - Amon_BB-d	T	75358	75358	1	107	SNP (transition)	11.2%	12
Variants: Amon_BB-d.backmapping.sorted - Amon_BB-d	T	75364	75364	1	108	SNP (transition)	12.0%	13
Variants: Amon_BB-d.backmapping.sorted - Amon_BB-d	T	75370	75370	1	110	SNP (transversion)	9.1%	10
Variants: Amon_BB-d.backmapping.sorted - Amon_BB-d	A	75398	75398	1	104	SNP (transition)	13.5%	14
Variants: Amon_BB-d.backmapping.sorted - Amon_BB-d	C	75435	75435	1	105	SNP (transversion)	11.4%	12
Variants: Amon_BB-d.backmapping.sorted - Amon_BB-d	T	75458	75458	1	110	SNP (transition)	10.0%	11
Variants: Amon_BB-d.backmapping.sorted - Amon_BB-d	A	75960	75960	1	152	SNP (transition)	8.6%	13
Variants: Amon_BB-d.backmapping.sorted - Amon_BB-d	T	76002	76002	1	167	SNP (transition)	13.2%	22
Variants: Amon_BB-d.backmapping.sorted - Amon_BB-d	A	76052	76052	1	176	SNP (transition)	13.1%	23
Variants: Amon_BB-d.backmapping.sorted - Amon_BB-d	A	76061	76061	1	181	SNP (transversion)	2.2%	4
Variants: Amon_BB-d.backmapping.sorted - Amon_BB-d	G	76077	76077	1	167	SNP (transition)	5.4%	9
Variants: Amon_BB-d.backmapping.sorted - Amon_BB-d	A	76145	76145	1	151	SNP (transition)	3.3%	5
Variants: Amon_BB-d.backmapping.sorted - Amon_BB-d	T	76302	76302	1	115	SNP (transversion)	4.3%	5
Variants: Amon_BB-d.backmapping.sorted - Amon_BB-d	G	76943	76942	0	132	Insertion (tandem repeat)	7.6%	10
Variants: Amon_BB-d.backmapping.sorted - Amon_BB-d	T	76968	76968	1	139	SNP (transition)	4.3%	6
Variants: Amon_BB-d.backmapping.sorted - Amon_BB-d	T	76988	76988	1	140	SNP (transition)	7.1%	10
Variants: Amon_BB-d.backmapping.sorted - Amon_BB-d	C	77182	77182	1	162	SNP (transition)	9.9%	16
Variants: Amon_BB-d.backmapping.sorted - Amon_BB-d	C	77188	77188	1	162	SNP (transversion)	7.4%	12
Variants: Amon_BB-d.backmapping.sorted - Amon_BB-d	T	77216	77216	1	155	SNP (transition)	6.5%	10
Variants: Amon_BB-d.backmapping.sorted - Amon_BB-d	A	77266	77266	1	133	SNP (transition)	12.0%	16
Variants: Amon_BB-d.backmapping.sorted - Amon_BB-d	A	77305	77305	1	134	SNP (transversion)	6.0%	8
Variants: Amon_BB-d.backmapping.sorted - Amon_BB-d	G	78047	78047	1	143	SNP (transversion)	6.3%	9
Variants: Amon_BB-d.backmapping.sorted - Amon_BB-d	T	78123	78123	1	135	SNP (transversion)	12.6%	17
Variants: Amon_BB-d.backmapping.sorted - Amon_BB-d	T	78141	78141	1	139	SNP (transversion)	7.2%	10
Variants: Amon_BB-d.backmapping.sorted - Amon_BB-d	T	78157	78157	1	138	SNP (transition)	8.0%	11
Variants: Amon_BB-d.backmapping.sorted - Amon_BB-d	A	78164	78164	1	138	SNP (transition)	8.7%	12
Variants: Amon_BB-d.backmapping.sorted - Amon_BB-d	G	78197	78197	1	129	SNP (transversion)	10.1%	13
Variants: Amon_BB-d.backmapping.sorted - Amon_BB-d	A	78214	78214	1	129	SNP (transversion)	10.9%	14
Variants: Amon_BB-d.backmapping.sorted - Amon_BB-d	C	78248	78248	1	133	SNP (transition)	9.8%	13
Variants: Amon_BB-d.backmapping.sorted - Amon_BB-d	T	78254	78254	1	133	SNP (transition)	12.8%	17
Variants: Amon_BB-d.backmapping.sorted - Amon_BB-d	T	78284	78284	1	128	SNP (transition)	7.8%	10
Variants: Amon_BB-d.backmapping.sorted - Amon_BB-d	A	78539	78539	1	115	SNP (transversion)	7.8%	9
Variants: Amon_BB-d.backmapping.sorted - Amon_BB-d	T	78563	78563	1	116	SNP (transversion)	9.5%	11
Variants: Amon_BB-d.backmapping.sorted - Amon_BB-d	A	78591	78591	1	121	SNP (transition)	12.4%	15
Variants: Amon_BB-d.backmapping.sorted - Amon_BB-d	T	79097	79097	1	149	SNP (transition)	8.1%	12
Variants: Amon_BB-d.backmapping.sorted - Amon_BB-d	A	79151	79151	1	150	SNP (transversion)	6.0%	9
Variants: Amon_BB-d.backmapping.sorted - Amon_BB-d	T	79202	79202	1	162	SNP (transition)	12.3%	20
Variants: Amon_BB-d.backmapping.sorted - Amon_BB-d	T	79205	79205	1	169	SNP (transversion)	14.2%	24
Variants: Amon_BB-d.backmapping.sorted - Amon_BB-d	A	79238	79238	1	155	SNP (transversion)	14.2%	22
Variants: Amon_BB-d.backmapping.sorted - Amon_BB-d	T	79266	79266	1	161	SNP (transversion)	8.1%	13
Variants: Amon_BB-d.backmapping.sorted - Amon_BB-d	T	79709	79709	1	143	SNP (transition)	14.0%	20
Variants: Amon_BB-d.backmapping.sorted - Amon_BB-d	G	80631	80631	1	127	SNP (transition)	4.7%	6
Variants: Amon_BB-d.backmapping.sorted - Amon_BB-d	T	80722	80722	1	127	SNP (transition)	7.1%	9
Variants: Amon_BB-d.backmapping.sorted - Amon_BB-d	A	80744	80744	1	119	SNP (transition)	5.9%	7
Variants: Amon_BB-d.backmapping.sorted - Amon_BB-d	A	80774	80774	1	135	SNP (transversion)	5.2%	7
Variants: Amon_BB-d.backmapping.sorted - Amon_BB-d	T	80779	80779	1	132	SNP (transversion)	6.1%	8
Variants: Amon_BB-d.backmapping.sorted - Amon_BB-d	G	80792	80792	1	143	SNP (transition)	19.6%	28
Variants: Amon_BB-d.backmapping.sorted - Amon_BB-d	A	80847	80847	1	153	SNP (transition)	9.2%	14
Variants: Amon_BB-d.backmapping.sorted - Amon_BB-d	A	80886	80886	1	158	SNP (transversion)	8.2%	13
Variants: Amon_BB-d.backmapping.sorted - Amon_BB-d	T	80907	80907	1	155	SNP (transition)	7.1%	11
Variants: Amon_BB-d.backmapping.sorted - Amon_BB-d	T	81092	81092	1	117	SNP (transition)	6.8%	8
Variants: Amon_BB-d.backmapping.sorted - Amon_BB-d	T	81127	81127	1	126	SNP (transition)	7.9%	10
Variants: Amon_BB-d.backmapping.sorted - Amon_BB-d	A	81525	81525	1	143	SNP (transversion)	8.4%	12
Variants: Amon_BB-d.backmapping.sorted - Amon_BB-d	C	81549	81549	1	137	SNP (transversion)	2.9%	4
Variants: Amon_BB-d.backmapping.sorted - Amon_BB-d	T	81585	81584	0	131	Insertion (tandem repeat)	6.1%	8
Variants: Amon_BB-d.backmapping.sorted - Amon_BB-d	C	81671	81671	1	112	SNP (transition)	7.1%	8
Variants: Amon_BB-d.backmapping.sorted - Amon_BB-d	A	81680	81679	0	112	Insertion (tandem repeat)	7.1%	8
Variants: Amon_BB-d.backmapping.sorted - Amon_BB-d	T	81697	81697	1	114	SNP (transition)	9.6%	11
Variants: Amon_BB-d.backmapping.sorted - Amon_BB-d	G	81732	81732	1	120	SNP (transversion)	9.2%	11
Variants: Amon_BB-d.backmapping.sorted - Amon_BB-d	T	81763	81763	1	117	SNP (transversion)	7.7%	9
Variants: Amon_BB-d.backmapping.sorted - Amon_BB-d	G	81777	81777	1	117	SNP (transversion)	10.3%	12
Variants: Amon_BB-d.backmapping.sorted - Amon_BB-d	A	81812	81812	1	113	SNP (transition)	9.7%	11
Variants: Amon_BB-d.backmapping.sorted - Amon_BB-d	T	82975	82975	1	142	SNP (transition)	2.8%	4
Variants: Amon_BB-d.backmapping.sorted - Amon_BB-d	G	82991	82991	1	142	SNP (transition)	2.8%	4
Variants: Amon_BB-d.backmapping.sorted - Amon_BB-d	G	83004	83004	1	143	SNP (transition)	4.2%	6
Variants: Amon_BB-d.backmapping.sorted - Amon_BB-d	T	83047	83047	1	131	SNP (transversion)	10.7%	14
Variants: Amon_BB-d.backmapping.sorted - Amon_BB-d	C	83070	83070	1	132	SNP (transition)	3.8%	5
Variants: Amon_BB-d.backmapping.sorted - Amon_BB-d	A	83085	83085	1	133	SNP (transition)	7.5%	10
Variants: Amon_BB-d.backmapping.sorted - Amon_BB-d	A	83152	83152	1	130	SNP (transversion)	6.2%	8
Variants: Amon_BB-d.backmapping.sorted - Amon_BB-d	A	83152	83152	1	130	SNP (transversion)	6.2%	8
Variants: Amon_BB-d.backmapping.sorted - Amon_BB-d	C	83193	83193	1	137	SNP (transition)	3.6%	5
Variants: Amon_BB-d.backmapping.sorted - Amon_BB-d	T	83201	83200	0	141	Insertion (tandem repeat)	5.7%	8
Variants: Amon_BB-d.backmapping.sorted - Amon_BB-d	TC	83207	83206	0	142	Insertion	7.7%	11
Variants: Amon_BB-d.backmapping.sorted - Amon_BB-d	C	83272	83272	1	127	SNP (transversion)	7.9%	10
Variants: Amon_BB-d.backmapping.sorted - Amon_BB-d	G	83318	83318	1	118	SNP (transversion)	9.3%	11
Variants: Amon_BB-d.backmapping.sorted - Amon_BB-d	T	83324	83324	1	118	SNP (transition)	9.3%	11
Variants: Amon_BB-d.backmapping.sorted - Amon_BB-d	C	83339	83339	1	117	SNP (transition)	12.0%	14
Variants: Amon_BB-d.backmapping.sorted - Amon_BB-d	T	83388	83388	1	130	SNP (transition)	11.5%	15
Variants: Amon_BB-d.backmapping.sorted - Amon_BB-d	C	83426	83426	1	127	SNP (transversion)	10.2%	13
Variants: Amon_BB-d.backmapping.sorted - Amon_BB-d	G	108788	108788	1	171	SNP (transversion)	4.7%	8
Variants: Amon_BB-d.backmapping.sorted - Amon_BB-d	C	108841	108841	1	169	SNP (transition)	6.5%	11
Variants: Amon_BB-d.backmapping.sorted - Amon_BB-d	TT	108896	108897	2	145	Substitution	9.0%	13
Variants: Amon_BB-d.backmapping.sorted - Amon_BB-d	C	111063	111063	1	183	SNP (transversion)	6.0%	11
Variants: Amon_BB-d.backmapping.sorted - Amon_BB-d	T	111397	111397	1	197	SNP (transversion)	14.2%	28
Variants: Amon_BB-d.backmapping.sorted - Amon_BB-d	G	113011	113011	1	152	SNP (transition)	7.9%	12
Variants: Amon_BB-d.backmapping.sorted - Amon_BB-d	A	113028	113028	1	150	SNP (transversion)	6.7%	10
Variants: Amon_BB-d.backmapping.sorted - Amon_BB-d	T	113678	113678	1	142	SNP (transversion)	7.7%	11
Variants: Amon_BB-d.backmapping.sorted - Amon_BB-d	A	113701	113701	1	147	SNP (transition)	2.7%	4
Variants: Amon_BB-d.backmapping.sorted - Amon_BB-d	A	114038	114038	1	156	SNP (transversion)	3.8%	6
Variants: Amon_BB-d.backmapping.sorted - Amon_BB-d	T	115209	115209	1	147	SNP (transversion)	8.2%	12
Variants: Amon_BB-d.backmapping.sorted - Amon_BB-d	T	115219	115219	1	149	SNP (transition)	8.1%	12
Variants: Amon_BB-d.backmapping.sorted - Amon_BB-d	C	115247	115247	1	147	SNP (transversion)	3.4%	5
Variants: Amon_BB-d.backmapping.sorted - Amon_BB-d	C	115249	115249	1	146	SNP (transversion)	10.3%	15
Variants: Amon_BB-d.backmapping.sorted - Amon_BB-d	T	115280	115280	1	136	SNP (transition)	10.3%	14
Variants: Amon_BB-d.backmapping.sorted - Amon_BB-d	GT	115293	115294	2	136 -> 137	Substitution	2.9%	4
Variants: Amon_BB-d.backmapping.sorted - Amon_BB-d	C	115315	115315	1	133	SNP (transition)	9.8%	13
Variants: Amon_BB-d.backmapping.sorted - Amon_BB-d	T	115344	115344	1	130	SNP (transition)	10.8%	14
Variants: Amon_BB-d.backmapping.sorted - Amon_BB-d	T	115363	115363	1	127	SNP (transversion)	9.4%	12
Variants: Amon_BB-d.backmapping.sorted - Amon_BB-d	A	115388	115388	1	116	SNP (transversion)	10.3%	12
Variants: Amon_BB-d.backmapping.sorted - Amon_BB-d	C	115414	115414	1	117	SNP (transition)	9.4%	11
Variants: Amon_BB-d.backmapping.sorted - Amon_BB-d	A	115430	115430	1	117	SNP (transversion)	9.4%	11
Variants: Amon_BB-d.backmapping.sorted - Amon_BB-d	T	115468	115468	1	119	SNP (transversion)	9.2%	11
Variants: Amon_BB-d.backmapping.sorted - Amon_BB-d	T	115539	115538	0	120	Insertion	5.0%	6
Variants: Amon_BB-d.backmapping.sorted - Amon_BB-d	T	116261	116261	1	168	SNP (transversion)	6.0%	10
Variants: Amon_BB-d.backmapping.sorted - Amon_BB-d	T	116299	116299	1	156	SNP (transition)	12.8%	20
Variants: Amon_BB-d.backmapping.sorted - Amon_BB-d	G	116774	116774	1	125	SNP (transversion)	3.2%	4
Variants: Amon_BB-d.backmapping.sorted - Amon_BB-d	A	116916	116916	1	121	SNP (transition)	4.1%	5
Variants: Amon_BB-d.backmapping.sorted - Amon_BB-d	G	118291	118291	1	153	SNP (transversion)	3.3%	5
Variants: Amon_BB-d.backmapping.sorted - Amon_BB-d	A	118331	118331	1	148	SNP (transversion)	6.1%	9
Variants: Amon_BB-d.backmapping.sorted - Amon_BB-d	C	119539	119539	1	141	SNP (transversion)	5.0%	7
Variants: Amon_BB-d.backmapping.sorted - Amon_BB-d	T	119772	119772	1	145	SNP (transition)	6.2%	9
Variants: Amon_BB-d.backmapping.sorted - Amon_BB-d	T	119808	119808	1	152	SNP (transition)	10.5%	16
Variants: Amon_BB-d.backmapping.sorted - Amon_BB-d	C	119810	119810	1	153	SNP (transition)	9.2%	14
Variants: Amon_BB-d.backmapping.sorted - Amon_BB-d	A	119825	119825	1	144	SNP (transversion)	2.8%	4
Variants: Amon_BB-d.backmapping.sorted - Amon_BB-d	T	119834	119834	1	142	SNP (transition)	5.6%	8
Variants: Amon_BB-d.backmapping.sorted - Amon_BB-d	T	119848	119848	1	141	SNP (transversion)	5.7%	8
Variants: Amon_BB-d.backmapping.sorted - Amon_BB-d	A	119876	119876	1	143	SNP (transition)	7.7%	11
Variants: Amon_BB-d.backmapping.sorted - Amon_BB-d	T	120153	120153	1	127	SNP (transition)	5.5%	7
Variants: Amon_BB-d.backmapping.sorted - Amon_BB-d	A	120171	120171	1	131	SNP (transition)	6.1%	8
Variants: Amon_BB-d.backmapping.sorted - Amon_BB-d	T	120319	120319	1	154	SNP (transversion)	4.5%	7
Variants: Amon_BB-d.backmapping.sorted - Amon_BB-d	T	120354	120354	1	137	SNP (transversion)	7.3%	10
Variants: Amon_BB-d.backmapping.sorted - Amon_BB-d	C	120395	120395	1	141	SNP (transversion)	11.3%	16
Variants: Amon_BB-d.backmapping.sorted - Amon_BB-d	T	120400	120400	1	144	SNP (transition)	2.8%	4
Variants: Amon_BB-d.backmapping.sorted - Amon_BB-d	G	120426	120426	1	150	SNP (transition)	14.0%	21
Variants: Amon_BB-d.backmapping.sorted - Amon_BB-d	A	120440	120440	1	151	SNP (transversion)	12.6%	19
Variants: Amon_BB-d.backmapping.sorted - Amon_BB-d	A	120448	120448	1	149	SNP (transversion)	12.1%	18
Variants: Amon_BB-d.backmapping.sorted - Amon_BB-d	T	120474	120474	1	159	SNP (transversion)	6.9%	11
Variants: Amon_BB-d.backmapping.sorted - Amon_BB-d	T	120512	120512	1	149	SNP (transition)	7.4%	11
Variants: Amon_BB-d.backmapping.sorted - Amon_BB-d		120527	120527	1	157	Deletion (tandem repeat)	5.7%	9
Variants: Amon_BB-d.backmapping.sorted - Amon_BB-d	T	120603	120603	1	124	SNP (transversion)	9.7%	12
Variants: Amon_BB-d.backmapping.sorted - Amon_BB-d	C	120609	120609	1	122	SNP (transversion)	4.1%	5
Variants: Amon_BB-d.backmapping.sorted - Amon_BB-d	G	121763	121763	1	124	SNP (transversion)	9.7%	12
Variants: Amon_BB-d.backmapping.sorted - Amon_BB-d	T	121985	121985	1	160	SNP (transversion)	5.6%	9
Variants: Amon_BB-d.backmapping.sorted - Amon_BB-d	G	122199	122199	1	191	SNP (transversion)	5.8%	11
Variants: Amon_BB-d.backmapping.sorted - Amon_BB-d	C	122235	122235	1	190	SNP (transversion)	23.2%	44
Variants: Amon_BB-d.backmapping.sorted - Amon_BB-d	G	122356	122356	1	155	SNP (transition)	7.7%	12
Variants: Amon_BB-d.backmapping.sorted - Amon_BB-d	G	122372	122372	1	147	SNP (transversion)	16.3%	24
Variants: Amon_BB-d.backmapping.sorted - Amon_BB-d	A	123014	123014	1	145	SNP (transversion)	4.1%	6
Variants: Amon_BB-d.backmapping.sorted - Amon_BB-d	T	123026	123026	1	150	SNP (transversion)	4.0%	6
Variants: Amon_BB-d.backmapping.sorted - Amon_BB-d	A	123039	123038	0	152	Insertion (tandem repeat)	5.9%	9
Variants: Amon_BB-d.backmapping.sorted - Amon_BB-d	C	123110	123110	1	164	SNP (transversion)	3.7%	6
Variants: Amon_BB-d.backmapping.sorted - Amon_BB-d	G	123466	123466	1	129	SNP (transition)	21.7%	28
Variants: Amon_BB-d.backmapping.sorted - Amon_BB-d	A	124180	124180	1	174	SNP (transversion)	11.5%	20
Variants: Amon_BB-d.backmapping.sorted - Amon_BB-d	C	124603	124603	1	154	SNP (transversion)	6.5%	10
Variants: Amon_BB-d.backmapping.sorted - Amon_BB-d	C	124613	124613	1	159	SNP (transversion)	15.1%	24
Variants: Amon_BB-d.backmapping.sorted - Amon_BB-d	G	124681	124681	1	140	SNP (transversion)	7.9%	11
Variants: Amon_BB-d.backmapping.sorted - Amon_BB-d	T	124699	124699	1	140	SNP (transition)	8.6%	12
Variants: Amon_BB-d.backmapping.sorted - Amon_BB-d	T	124717	124717	1	152	SNP (transversion)	8.6%	13
Variants: Amon_BB-d.backmapping.sorted - Amon_BB-d	T	124835	124834	0	164	Insertion (tandem repeat)	15.9%	26
Variants: Amon_BB-d.backmapping.sorted - Amon_BB-d	A	124876	124876	1	147	SNP (transversion)	12.9%	19
Variants: Amon_BB-d.backmapping.sorted - Amon_BB-d	G	125038	125038	1	146	SNP (transition)	16.4%	24
Variants: Amon_BB-d.backmapping.sorted - Amon_BB-d	C	125102	125102	1	151	SNP (transition)	22.5%	34
Variants: Amon_BB-d.backmapping.sorted - Amon_BB-d	G	125145	125145	1	150	SNP (transition)	9.3%	14
Variants: Amon_BB-d.backmapping.sorted - Amon_BB-d	G	125157	125157	1	150	SNP (transition)	9.3%	14
Variants: Amon_BB-d.backmapping.sorted - Amon_BB-d	T	125179	125179	1	150	SNP (transversion)	8.7%	13
Variants: Amon_BB-d.backmapping.sorted - Amon_BB-d	A	126292	126292	1	133	SNP (transversion)	6.0%	8
Variants: Amon_BB-d.backmapping.sorted - Amon_BB-d	A	126517	126517	1	149	SNP (transversion)	8.1%	12
Variants: Amon_BB-d.backmapping.sorted - Amon_BB-d	A	126522	126522	1	151	SNP (transversion)	4.0%	6
Variants: Amon_BB-d.backmapping.sorted - Amon_BB-d	A	126561	126561	1	144	SNP (transition)	4.2%	6
Variants: Amon_BB-d.backmapping.sorted - Amon_BB-d	A	126872	126872	1	142	SNP (transition)	2.8%	4
Variants: Amon_BB-d.backmapping.sorted - Amon_BB-d	C	126890	126890	1	151	SNP (transition)	13.2%	20
Variants: Amon_BW.backmapping.sorted - Amon_BW	C	738	738	1	275	SNP (transversion)	1.5%	4
Variants: Amon_BW.backmapping.sorted - Amon_BW	A	955	955	1	237	SNP (transversion)	2.5%	6
Variants: Amon_BW.backmapping.sorted - Amon_BW	A	1325	1325	1	232	SNP (transversion)	2.2%	5
Variants: Amon_BW.backmapping.sorted - Amon_BW	A	1342	1342	1	231	SNP (transversion)	2.2%	5
Variants: Amon_BW.backmapping.sorted - Amon_BW	A	1355	1355	1	241	SNP (transition)	1.7%	4
Variants: Amon_BW.backmapping.sorted - Amon_BW	T	1465	1465	1	241	SNP (transversion)	1.7%	4
Variants: Amon_BW.backmapping.sorted - Amon_BW	T	1480	1480	1	247	SNP (transversion)	1.6%	4
Variants: Amon_BW.backmapping.sorted - Amon_BW	T	1509	1509	1	252	SNP (transition)	2.4%	6
Variants: Amon_BW.backmapping.sorted - Amon_BW	C	1595	1595	1	236	SNP (transversion)	3.0%	7
Variants: Amon_BW.backmapping.sorted - Amon_BW	T	1736	1736	1	248	SNP (transition)	2.8%	7
Variants: Amon_BW.backmapping.sorted - Amon_BW	TA	1749	1750	2	258 -> 259	Substitution	2.3%	6
Variants: Amon_BW.backmapping.sorted - Amon_BW	T	1810	1810	1	244	SNP (transition)	2.0%	5
Variants: Amon_BW.backmapping.sorted - Amon_BW	T	1934	1934	1	234	SNP (transversion)	2.6%	6
Variants: Amon_BW.backmapping.sorted - Amon_BW		1956	1956	1	238	Deletion (tandem repeat)	7.1%	17
Variants: Amon_BW.backmapping.sorted - Amon_BW	T	1956	1955	0	234	Insertion (tandem repeat)	3.8%	9
Variants: Amon_BW.backmapping.sorted - Amon_BW		1957	1957	1	239	Deletion (tandem repeat)	4.2%	10
Variants: Amon_BW.backmapping.sorted - Amon_BW	T	2292	2291	0	198	Insertion (tandem repeat)	2.5%	5
Variants: Amon_BW.backmapping.sorted - Amon_BW	A	3420	3420	1	225	SNP (transversion)	4.0%	9
Variants: Amon_BW.backmapping.sorted - Amon_BW	G	3460	3460	1	225	SNP (transition)	2.2%	5
Variants: Amon_BW.backmapping.sorted - Amon_BW		4762	4762	1	194	Deletion (tandem repeat)	12.9%	25
Variants: Amon_BW.backmapping.sorted - Amon_BW	A	5943	5943	1	232	SNP (transition)	3.0%	7
Variants: Amon_BW.backmapping.sorted - Amon_BW	T	5980	5980	1	270	SNP (transition)	3.0%	8
Variants: Amon_BW.backmapping.sorted - Amon_BW	G	5987	5987	1	274	SNP (transition)	3.3%	9
Variants: Amon_BW.backmapping.sorted - Amon_BW	C	6061	6061	1	280	SNP (transversion)	2.9%	8
Variants: Amon_BW.backmapping.sorted - Amon_BW	T	6620	6620	1	268	SNP (transition)	1.9%	5
Variants: Amon_BW.backmapping.sorted - Amon_BW	A	7412	7412	1	350	SNP (transition)	2.0%	7
Variants: Amon_BW.backmapping.sorted - Amon_BW	T	7529	7529	1	378	SNP (transition)	2.1%	8
Variants: Amon_BW.backmapping.sorted - Amon_BW	T	7580	7580	1	357	SNP (transversion)	1.7%	6
Variants: Amon_BW.backmapping.sorted - Amon_BW		9841	9841	1	483	Deletion (tandem repeat)	2.7%	13
Variants: Amon_BW.backmapping.sorted - Amon_BW	T	9841	9840	0	481	Insertion (tandem repeat)	1.9%	9
Variants: Amon_BW.backmapping.sorted - Amon_BW	G	12633	12633	1	695	SNP (transversion)	2.3%	16
Variants: Amon_BW.backmapping.sorted - Amon_BW	T	12801	12801	1	607	SNP (transition)	1.2%	7
Variants: Amon_BW.backmapping.sorted - Amon_BW	G	12846	12846	1	558	SNP (transversion)	2.3%	13
Variants: Amon_BW.backmapping.sorted - Amon_BW		12947	12947	1	509	Deletion (tandem repeat)	13.2%	67
Variants: Amon_BW.backmapping.sorted - Amon_BW	T	12947	12946	0	508	Insertion (tandem repeat)	5.3%	27
Variants: Amon_BW.backmapping.sorted - Amon_BW		12948	12948	1	506	Deletion (tandem repeat)	4.0%	20
Variants: Amon_BW.backmapping.sorted - Amon_BW	G	13407	13407	1	416	SNP (transition)	1.7%	7
Variants: Amon_BW.backmapping.sorted - Amon_BW		13634	13634	1	414	Deletion (tandem repeat)	3.6%	15
Variants: Amon_BW.backmapping.sorted - Amon_BW	A	13634	13633	0	411	Insertion (tandem repeat)	2.7%	11
Variants: Amon_BW.backmapping.sorted - Amon_BW	A	14312	14312	1	313	SNP (transition)	2.2%	7
Variants: Amon_BW.backmapping.sorted - Amon_BW	A	14363	14363	1	291	SNP (transversion)	3.1%	9
Variants: Amon_BW.backmapping.sorted - Amon_BW	T	14512	14512	1	306	SNP (transition)	2.3%	7
Variants: Amon_BW.backmapping.sorted - Amon_BW	A	14792	14792	1	276	SNP (transition)	2.2%	6
Variants: Amon_BW.backmapping.sorted - Amon_BW	G	14954	14954	1	300	SNP (transition)	2.0%	6
Variants: Amon_BW.backmapping.sorted - Amon_BW	A	14978	14978	1	293	SNP (transversion)	2.4%	7
Variants: Amon_BW.backmapping.sorted - Amon_BW	C	15065	15065	1	292	SNP (transversion)	2.1%	6
Variants: Amon_BW.backmapping.sorted - Amon_BW	A	16339	16339	1	226	SNP (transition)	2.2%	5
Variants: Amon_BW.backmapping.sorted - Amon_BW	A	17958	17958	1	217	SNP (transversion)	2.8%	6
Variants: Amon_BW.backmapping.sorted - Amon_BW	A	17986	17986	1	223	SNP (transversion)	2.2%	5
Variants: Amon_BW.backmapping.sorted - Amon_BW	A	17991	17991	1	224	SNP (transition)	1.8%	4
Variants: Amon_BW.backmapping.sorted - Amon_BW	A	18038	18038	1	196	SNP (transition)	2.6%	5
Variants: Amon_BW.backmapping.sorted - Amon_BW	T	18163	18163	1	196	SNP (transition)	4.6%	9
Variants: Amon_BW.backmapping.sorted - Amon_BW	A	18164	18164	1	197	SNP (transition)	2.5%	5
Variants: Amon_BW.backmapping.sorted - Amon_BW		18683	18683	1	182	Deletion (tandem repeat)	11.5%	21
Variants: Amon_BW.backmapping.sorted - Amon_BW	A	18683	18682	0	181	Insertion (tandem repeat)	3.9%	7
Variants: Amon_BW.backmapping.sorted - Amon_BW	G	21464	21464	1	215	SNP (transition)	4.2%	9
Variants: Amon_BW.backmapping.sorted - Amon_BW	C	21623	21623	1	221	SNP (transition)	5.0%	11
Variants: Amon_BW.backmapping.sorted - Amon_BW	G	21957	21957	1	207	SNP (transversion)	2.4%	5
Variants: Amon_BW.backmapping.sorted - Amon_BW	G	21979	21979	1	218	SNP (transition)	2.3%	5
Variants: Amon_BW.backmapping.sorted - Amon_BW	A	22244	22244	1	222	SNP (transversion)	1.8%	4
Variants: Amon_BW.backmapping.sorted - Amon_BW	C	23317	23316	0	245	Insertion (tandem repeat)	2.4%	6
Variants: Amon_BW.backmapping.sorted - Amon_BW	A	23394	23394	1	252	SNP (transversion)	4.8%	12
Variants: Amon_BW.backmapping.sorted - Amon_BW	G	23540	23540	1	258	SNP (transition)	9.3%	24
Variants: Amon_BW.backmapping.sorted - Amon_BW	T	23569	23569	1	249	SNP (transversion)	4.4%	11
Variants: Amon_BW.backmapping.sorted - Amon_BW	A	23863	23863	1	254	SNP (transition)	2.4%	6
Variants: Amon_BW.backmapping.sorted - Amon_BW		25246	25246	1	285	Deletion (tandem repeat)	13.7%	39
Variants: Amon_BW.backmapping.sorted - Amon_BW	T	25246	25245	0	285	Insertion (tandem repeat)	3.5%	10
Variants: Amon_BW.backmapping.sorted - Amon_BW		25289	25289	1	305	Deletion (tandem repeat)	3.6%	11
Variants: Amon_BW.backmapping.sorted - Amon_BW	A	25597	25596	0	435	Insertion (tandem repeat)	2.1%	9
Variants: Amon_BW.backmapping.sorted - Amon_BW	T	25625	25625	1	450	SNP (transition)	16.0%	72
Variants: Amon_BW.backmapping.sorted - Amon_BW	C	25699	25699	1	688	SNP (transition)	13.4%	92
Variants: Amon_BW.backmapping.sorted - Amon_BW	T	25775	25775	1	853	SNP (transversion)	1.3%	11
Variants: Amon_BW.backmapping.sorted - Amon_BW	T	25813	25813	1	837	SNP (transversion)	11.5%	96
Variants: Amon_BW.backmapping.sorted - Amon_BW	C	25863	25863	1	544	SNP (transversion)	19.9%	108
Variants: Amon_BW.backmapping.sorted - Amon_BW	AA	25864	25865	2	525 -> 531	Substitution	8.3% -> 8.9%	44 -> 47
Variants: Amon_BW.backmapping.sorted - Amon_BW	C	25867	25867	1	519	SNP (transversion)	6.0%	31
Variants: Amon_BW.backmapping.sorted - Amon_BW	C	26024	26024	1	437	SNP (transition)	2.7%	12
Variants: Amon_BW.backmapping.sorted - Amon_BW		26372	26372	1	488	Deletion (tandem repeat)	4.9%	24
Variants: Amon_BW.backmapping.sorted - Amon_BW	T	26372	26371	0	488	Insertion (tandem repeat)	1.8%	9
Variants: Amon_BW.backmapping.sorted - Amon_BW	A	26658	26657	0	517	Insertion (tandem repeat)	1.4%	7
Variants: Amon_BW.backmapping.sorted - Amon_BW	AAA	26663	26665	3	513 -> 520	Substitution	2.1%	11
Variants: Amon_BW.backmapping.sorted - Amon_BW	T	27135	27135	1	388	SNP (transversion)	2.1%	8
Variants: Amon_BW.backmapping.sorted - Amon_BW	A	27395	27395	1	378	SNP (transition)	1.3%	5
Variants: Amon_BW.backmapping.sorted - Amon_BW	A	27399	27399	1	382	SNP (transition)	2.4%	9
Variants: Amon_BW.backmapping.sorted - Amon_BW	A	27409	27409	1	375	SNP (transversion)	2.1%	8
Variants: Amon_BW.backmapping.sorted - Amon_BW	A	27411	27411	1	371	SNP (transversion)	1.9%	7
Variants: Amon_BW.backmapping.sorted - Amon_BW	T	27448	27448	1	363	SNP (transversion)	1.7%	6
Variants: Amon_BW.backmapping.sorted - Amon_BW	A	27509	27509	1	363	SNP (transversion)	1.9%	7
Variants: Amon_BW.backmapping.sorted - Amon_BW	G	27583	27583	1	404	SNP (transition)	1.2%	5
Variants: Amon_BW.backmapping.sorted - Amon_BW	G	27710	27710	1	316	SNP (transversion)	1.9%	6
Variants: Amon_BW.backmapping.sorted - Amon_BW	C	27749	27749	1	325	SNP (transition)	1.2%	4
Variants: Amon_BW.backmapping.sorted - Amon_BW	C	27798	27798	1	333	SNP (transition)	1.5%	5
Variants: Amon_BW.backmapping.sorted - Amon_BW	T	27931	27931	1	317	SNP (transversion)	2.2%	7
Variants: Amon_BW.backmapping.sorted - Amon_BW	T	28147	28147	1	275	SNP (transition)	2.2%	6
Variants: Amon_BW.backmapping.sorted - Amon_BW		28313	28313	1	275	Deletion (tandem repeat)	12.7%	35
Variants: Amon_BW.backmapping.sorted - Amon_BW	T	28313	28312	0	274	Insertion (tandem repeat)	9.9%	27
Variants: Amon_BW.backmapping.sorted - Amon_BW	A	28320	28320	1	259	SNP (transversion)	2.7%	7
Variants: Amon_BW.backmapping.sorted - Amon_BW	T	28342	28342	1	257	SNP (transversion)	9.7%	25
Variants: Amon_BW.backmapping.sorted - Amon_BW	T	28400	28400	1	300	SNP (transversion)	2.7%	8
Variants: Amon_BW.backmapping.sorted - Amon_BW	T	28440	28440	1	298	SNP (transition)	3.0%	9
Variants: Amon_BW.backmapping.sorted - Amon_BW	C	28491	28491	1	307	SNP (transition)	1.6%	5
Variants: Amon_BW.backmapping.sorted - Amon_BW	A	28495	28495	1	307	SNP (transition)	1.6%	5
Variants: Amon_BW.backmapping.sorted - Amon_BW	G	28564	28564	1	270	SNP (transition)	1.9%	5
Variants: Amon_BW.backmapping.sorted - Amon_BW	T	28801	28801	1	307	SNP (transversion)	2.9%	9
Variants: Amon_BW.backmapping.sorted - Amon_BW	T	28835	28835	1	301	SNP (transversion)	2.3%	7
Variants: Amon_BW.backmapping.sorted - Amon_BW	A	28872	28872	1	297	SNP (transition)	2.0%	6
Variants: Amon_BW.backmapping.sorted - Amon_BW	A	28885	28885	1	288	SNP (transition)	3.5%	10
Variants: Amon_BW.backmapping.sorted - Amon_BW	G	28959	28959	1	271	SNP (transition)	2.6%	7
Variants: Amon_BW.backmapping.sorted - Amon_BW	A	28961	28961	1	277	SNP (transversion)	2.2%	6
Variants: Amon_BW.backmapping.sorted - Amon_BW	T	29030	29030	1	254	SNP (transition)	1.6%	4
Variants: Amon_BW.backmapping.sorted - Amon_BW	T	29116	29116	1	238	SNP (transition)	2.1%	5
Variants: Amon_BW.backmapping.sorted - Amon_BW	T	29347	29347	1	263	SNP (transition)	3.4%	9
Variants: Amon_BW.backmapping.sorted - Amon_BW	C	29455	29455	1	264	SNP (transversion)	3.0%	8
Variants: Amon_BW.backmapping.sorted - Amon_BW	A	29527	29527	1	263	SNP (transition)	2.7%	7
Variants: Amon_BW.backmapping.sorted - Amon_BW	T	29655	29655	1	258	SNP (transversion)	3.1%	8
Variants: Amon_BW.backmapping.sorted - Amon_BW	T	30000	30000	1	211	SNP (transversion)	2.4%	5
Variants: Amon_BW.backmapping.sorted - Amon_BW		30120	30120	1	233	Deletion (tandem repeat)	2.1%	5
Variants: Amon_BW.backmapping.sorted - Amon_BW	A	30120	30119	0	231	Insertion (tandem repeat)	1.7%	4
Variants: Amon_BW.backmapping.sorted - Amon_BW	G	30824	30824	1	220	SNP (transition)	4.1%	9
Variants: Amon_BW.backmapping.sorted - Amon_BW		31201	31201	1	247	Deletion (tandem repeat)	4.9%	12
Variants: Amon_BW.backmapping.sorted - Amon_BW	G	32326	32326	1	255	SNP (transition)	2.0%	5
Variants: Amon_BW.backmapping.sorted - Amon_BW	A	32861	32861	1	290	SNP (transition)	1.7%	5
Variants: Amon_BW.backmapping.sorted - Amon_BW	C	32903	32903	1	290	SNP (transversion)	1.4%	4
Variants: Amon_BW.backmapping.sorted - Amon_BW	C	33047	33047	1	318	SNP (transition)	2.2%	7
Variants: Amon_BW.backmapping.sorted - Amon_BW	A	33053	33053	1	320	SNP (transversion)	1.6%	5
Variants: Amon_BW.backmapping.sorted - Amon_BW	T	33355	33355	1	287	SNP (transition)	1.4%	4
Variants: Amon_BW.backmapping.sorted - Amon_BW	C	33430	33430	1	314	SNP (transversion)	6.7%	21
Variants: Amon_BW.backmapping.sorted - Amon_BW	C	34073	34073	1	271	SNP (transversion)	5.5%	15
Variants: Amon_BW.backmapping.sorted - Amon_BW	C	34132	34132	1	255	SNP (transversion)	2.4%	6
Variants: Amon_BW.backmapping.sorted - Amon_BW	T	34503	34503	1	265	SNP (transition)	1.5%	4
Variants: Amon_BW.backmapping.sorted - Amon_BW	C	34663	34663	1	263	SNP (transition)	3.0%	8
Variants: Amon_BW.backmapping.sorted - Amon_BW	T	35003	35002	0	203	Insertion (tandem repeat)	4.4%	9
Variants: Amon_BW.backmapping.sorted - Amon_BW	C	35378	35378	1	261	SNP (transversion)	1.9%	5
Variants: Amon_BW.backmapping.sorted - Amon_BW	G	35404	35404	1	255	SNP (transversion)	7.1%	18
Variants: Amon_BW.backmapping.sorted - Amon_BW	A	35471	35471	1	240	SNP (transition)	4.2%	10
Variants: Amon_BW.backmapping.sorted - Amon_BW	T	35503	35503	1	231	SNP (transition)	3.0%	7
Variants: Amon_BW.backmapping.sorted - Amon_BW	C	35857	35857	1	242	SNP (transition)	2.5%	6
Variants: Amon_BW.backmapping.sorted - Amon_BW	A	35863	35862	0	239	Insertion (tandem repeat)	5.0%	12
Variants: Amon_BW.backmapping.sorted - Amon_BW	A	36075	36075	1	251	SNP (transition)	3.2%	8
Variants: Amon_BW.backmapping.sorted - Amon_BW	A	36099	36099	1	235	SNP (transversion)	2.6%	6
Variants: Amon_BW.backmapping.sorted - Amon_BW	C	36111	36111	1	239	SNP (transversion)	2.5%	6
Variants: Amon_BW.backmapping.sorted - Amon_BW	G	36166	36166	1	258	SNP (transversion)	4.3%	11
Variants: Amon_BW.backmapping.sorted - Amon_BW	T	36167	36167	1	259	SNP (transversion)	5.4%	14
Variants: Amon_BW.backmapping.sorted - Amon_BW	A	36231	36231	1	247	SNP (transversion)	2.8%	7
Variants: Amon_BW.backmapping.sorted - Amon_BW		36309	36309	1	237	Deletion (tandem repeat)	6.8%	16
Variants: Amon_BW.backmapping.sorted - Amon_BW	T	36309	36308	0	237	Insertion (tandem repeat)	3.0%	7
Variants: Amon_BW.backmapping.sorted - Amon_BW	A	36709	36709	1	256	SNP (transition)	2.3%	6
Variants: Amon_BW.backmapping.sorted - Amon_BW	T	36986	36986	1	256	SNP (transversion)	3.5%	9
Variants: Amon_BW.backmapping.sorted - Amon_BW	G	37844	37844	1	273	SNP (transversion)	2.2%	6
Variants: Amon_BW.backmapping.sorted - Amon_BW	TAA	37897	37899	2	301 -> 303	Substitution	2.0%	6
Variants: Amon_BW.backmapping.sorted - Amon_BW	T	38266	38266	1	304	SNP (transition)	1.3%	4
Variants: Amon_BW.backmapping.sorted - Amon_BW	T	38737	38737	1	321	SNP (transition)	1.9%	6
Variants: Amon_BW.backmapping.sorted - Amon_BW	T	38816	38816	1	298	SNP (transition)	3.0%	9
Variants: Amon_BW.backmapping.sorted - Amon_BW	T	39022	39022	1	332	SNP (transition)	1.5%	5
Variants: Amon_BW.backmapping.sorted - Amon_BW	A	39057	39057	1	370	SNP (transversion)	2.2%	8
Variants: Amon_BW.backmapping.sorted - Amon_BW	CG	39097	39098	2	383	Substitution	2.1%	8
Variants: Amon_BW.backmapping.sorted - Amon_BW	A	39159	39159	1	375	SNP (transition)	1.3%	5
Variants: Amon_BW.backmapping.sorted - Amon_BW	T	39161	39161	1	374	SNP (transversion)	1.6%	6
Variants: Amon_BW.backmapping.sorted - Amon_BW	A	39306	39306	1	348	SNP (transition)	2.0%	7
Variants: Amon_BW.backmapping.sorted - Amon_BW	C	39315	39315	1	355	SNP (transition)	2.3%	8
Variants: Amon_BW.backmapping.sorted - Amon_BW	G	39333	39333	1	378	SNP (transversion)	1.9%	7
Variants: Amon_BW.backmapping.sorted - Amon_BW	T	39417	39417	1	361	SNP (transition)	1.7%	6
Variants: Amon_BW.backmapping.sorted - Amon_BW	C	39662	39662	1	387	SNP (transition)	2.1%	8
Variants: Amon_BW.backmapping.sorted - Amon_BW	C	39737	39736	0	424	Insertion (tandem repeat)	2.4%	10
Variants: Amon_BW.backmapping.sorted - Amon_BW	T	40158	40158	1	453	SNP (transition)	2.9%	13
Variants: Amon_BW.backmapping.sorted - Amon_BW	A	40175	40175	1	451	SNP (transition)	1.3%	6
Variants: Amon_BW.backmapping.sorted - Amon_BW	A	40272	40272	1	480	SNP (transition)	1.9%	9
Variants: Amon_BW.backmapping.sorted - Amon_BW	C	40764	40764	1	504	SNP (transition)	1.4%	7
Variants: Amon_BW.backmapping.sorted - Amon_BW	A	41050	41049	0	537	Insertion	1.3%	7
Variants: Amon_BW.backmapping.sorted - Amon_BW	A	41118	41118	1	580	SNP (transversion)	1.2%	7
Variants: Amon_BW.backmapping.sorted - Amon_BW	G	41447	41447	1	531	SNP (transversion)	1.7%	9
Variants: Amon_BW.backmapping.sorted - Amon_BW	A	41454	41454	1	536	SNP (transition)	1.3%	7
Variants: Amon_BW.backmapping.sorted - Amon_BW	T	41727	41727	1	537	SNP (transition)	1.3%	7
Variants: Amon_BW.backmapping.sorted - Amon_BW		41938	41938	1	530	Deletion (tandem repeat)	6.8%	36
Variants: Amon_BW.backmapping.sorted - Amon_BW	T	41938	41937	0	529	Insertion (tandem repeat)	5.3%	28
Variants: Amon_BW.backmapping.sorted - Amon_BW	C	42037	42037	1	566	SNP (transition)	2.5%	14
Variants: Amon_BW.backmapping.sorted - Amon_BW	A	42060	42060	1	593	SNP (transversion)	2.2%	13
Variants: Amon_BW.backmapping.sorted - Amon_BW	C	42122	42122	1	675	SNP (transversion)	2.4%	16
Variants: Amon_BW.backmapping.sorted - Amon_BW	G	42128	42128	1	673	SNP (transversion)	1.6%	11
Variants: Amon_BW.backmapping.sorted - Amon_BW	T	42307	42307	1	546	SNP (transition)	1.5%	8
Variants: Amon_BW.backmapping.sorted - Amon_BW	T	42328	42328	1	533	SNP (transition)	1.3%	7
Variants: Amon_BW.backmapping.sorted - Amon_BW	T	42579	42579	1	645	SNP (transversion)	1.1%	7
Variants: Amon_BW.backmapping.sorted - Amon_BW	T	42661	42661	1	585	SNP (transversion)	3.9%	23
Variants: Amon_BW.backmapping.sorted - Amon_BW	T	42704	42704	1	530	SNP (transversion)	3.8%	20
Variants: Amon_BW.backmapping.sorted - Amon_BW	T	42721	42721	1	521	SNP (transversion)	1.5%	8
Variants: Amon_BW.backmapping.sorted - Amon_BW	G	42990	42990	1	479	SNP (transversion)	1.5%	7
Variants: Amon_BW.backmapping.sorted - Amon_BW	G	43047	43047	1	468	SNP (transversion)	1.9%	9
Variants: Amon_BW.backmapping.sorted - Amon_BW	T	43615	43615	1	359	SNP (transition)	2.8%	10
Variants: Amon_BW.backmapping.sorted - Amon_BW	T	43736	43736	1	304	SNP (transversion)	3.0%	9
Variants: Amon_BW.backmapping.sorted - Amon_BW	T	43814	43814	1	302	SNP (transversion)	2.3%	7
Variants: Amon_BW.backmapping.sorted - Amon_BW	A	43869	43869	1	335	SNP (transition)	2.7%	9
Variants: Amon_BW.backmapping.sorted - Amon_BW	T	43919	43919	1	305	SNP (transversion)	2.3%	7
Variants: Amon_BW.backmapping.sorted - Amon_BW	A	44491	44491	1	298	SNP (transition)	1.3%	4
Variants: Amon_BW.backmapping.sorted - Amon_BW	C	44636	44636	1	256	SNP (transition)	2.0%	5
Variants: Amon_BW.backmapping.sorted - Amon_BW	G	44973	44973	1	234	SNP (transition)	1.7%	4
Variants: Amon_BW.backmapping.sorted - Amon_BW	C	45029	45029	1	215	SNP (transversion)	4.2%	9
Variants: Amon_BW.backmapping.sorted - Amon_BW		46736	46736	1	203	Deletion (tandem repeat)	8.9%	18
Variants: Amon_BW.backmapping.sorted - Amon_BW	A	46736	46735	0	199	Insertion (tandem repeat)	4.5%	9
Variants: Amon_BW.backmapping.sorted - Amon_BW	A	46966	46966	1	159	SNP (transition)	4.4%	7
Variants: Amon_BW.backmapping.sorted - Amon_BW	T	47193	47193	1	169	SNP (transition)	3.6%	6
Variants: Amon_BW.backmapping.sorted - Amon_BW	A	47224	47224	1	175	SNP (transversion)	3.4%	6
Variants: Amon_BW.backmapping.sorted - Amon_BW	T	47242	47242	1	187	SNP (transition)	5.3%	10
Variants: Amon_BW.backmapping.sorted - Amon_BW	T	47259	47259	1	180	SNP (transition)	5.0%	9
Variants: Amon_BW.backmapping.sorted - Amon_BW	A	47313	47313	1	177	SNP (transition)	2.8%	5
Variants: Amon_BW.backmapping.sorted - Amon_BW	C	47683	47683	1	198	SNP (transversion)	2.5%	5
Variants: Amon_BW.backmapping.sorted - Amon_BW	C	48536	48536	1	179	SNP (transversion)	3.9%	7
Variants: Amon_BW.backmapping.sorted - Amon_BW	T	48923	48923	1	161	SNP (transversion)	3.7%	6
Variants: Amon_BW.backmapping.sorted - Amon_BW	C	49535	49535	1	203	SNP (transition)	2.0%	4
Variants: Amon_BW.backmapping.sorted - Amon_BW	G	49609	49609	1	204	SNP (transition)	5.4%	11
Variants: Amon_BW.backmapping.sorted - Amon_BW	G	49987	49987	1	214	SNP (transition)	2.3%	5
Variants: Amon_BW.backmapping.sorted - Amon_BW		50281	50281	1	227	Deletion (tandem repeat)	12.8%	29
Variants: Amon_BW.backmapping.sorted - Amon_BW	T	50281	50280	0	225	Insertion (tandem repeat)	7.6%	17
Variants: Amon_BW.backmapping.sorted - Amon_BW	T	50299	50299	1	218	SNP (transition)	11.5%	25
Variants: Amon_BW.backmapping.sorted - Amon_BW	T	50318	50318	1	226	SNP (transversion)	11.9%	27
Variants: Amon_BW.backmapping.sorted - Amon_BW	A	50753	50753	1	208	SNP (transition)	2.9%	6
Variants: Amon_BW.backmapping.sorted - Amon_BW	A	51088	51088	1	211	SNP (transversion)	6.6%	14
Variants: Amon_BW.backmapping.sorted - Amon_BW	A	51637	51637	1	212	SNP (transition)	2.4%	5
Variants: Amon_BW.backmapping.sorted - Amon_BW	A	52034	52034	1	211	SNP (transition)	1.9%	4
Variants: Amon_BW.backmapping.sorted - Amon_BW	A	52048	52048	1	217	SNP (transversion)	2.3%	5
Variants: Amon_BW.backmapping.sorted - Amon_BW	G	52114	52114	1	244	SNP (transversion)	2.5%	6
Variants: Amon_BW.backmapping.sorted - Amon_BW	T	52653	52653	1	220	SNP (transversion)	2.7%	6
Variants: Amon_BW.backmapping.sorted - Amon_BW	C	52756	52756	1	236	SNP (transversion)	3.0%	7
Variants: Amon_BW.backmapping.sorted - Amon_BW	A	52764	52764	1	237	SNP (transition)	2.5%	6
Variants: Amon_BW.backmapping.sorted - Amon_BW	T	52784	52784	1	237	SNP (transition)	1.7%	4
Variants: Amon_BW.backmapping.sorted - Amon_BW	A	52901	52901	1	257	SNP (transition)	2.7%	7
Variants: Amon_BW.backmapping.sorted - Amon_BW	A	52932	52932	1	260	SNP (transition)	2.7%	7
Variants: Amon_BW.backmapping.sorted - Amon_BW	A	53083	53083	1	266	SNP (transition)	1.5%	4
Variants: Amon_BW.backmapping.sorted - Amon_BW	G	53135	53135	1	253	SNP (transversion)	2.0%	5
Variants: Amon_BW.backmapping.sorted - Amon_BW	A	53152	53152	1	253	SNP (transition)	1.6%	4
Variants: Amon_BW.backmapping.sorted - Amon_BW	A	53185	53185	1	240	SNP (transition)	2.9%	7
Variants: Amon_BW.backmapping.sorted - Amon_BW	T	53298	53298	1	261	SNP (transition)	1.5%	4
Variants: Amon_BW.backmapping.sorted - Amon_BW	T	53477	53477	1	285	SNP (transition)	2.1%	6
Variants: Amon_BW.backmapping.sorted - Amon_BW	T	54196	54196	1	317	SNP (transversion)	2.5%	8
Variants: Amon_BW.backmapping.sorted - Amon_BW	G	54318	54318	1	325	SNP (transition)	1.2%	4
Variants: Amon_BW.backmapping.sorted - Amon_BW	C	54505	54505	1	331	SNP (transversion)	2.7%	9
Variants: Amon_BW.backmapping.sorted - Amon_BW	A	54538	54538	1	330	SNP (transversion)	1.8%	6
Variants: Amon_BW.backmapping.sorted - Amon_BW		54548	54548	1	326	Deletion (tandem repeat)	7.1%	23
Variants: Amon_BW.backmapping.sorted - Amon_BW	T	54548	54547	0	325	Insertion (tandem repeat)	3.1%	10
Variants: Amon_BW.backmapping.sorted - Amon_BW	T	54570	54570	1	332	SNP (transversion)	3.3%	11
Variants: Amon_BW.backmapping.sorted - Amon_BW	G	54586	54586	1	325	SNP (transversion)	2.5%	8
Variants: Amon_BW.backmapping.sorted - Amon_BW	C	54626	54626	1	303	SNP (transition)	4.0%	12
Variants: Amon_BW.backmapping.sorted - Amon_BW	A	54686	54685	0	294	Insertion (tandem repeat)	3.1%	9
Variants: Amon_BW.backmapping.sorted - Amon_BW	G	54686	54686	1	295	SNP (transition)	1.4%	4
Variants: Amon_BW.backmapping.sorted - Amon_BW	A	54850	54850	1	274	SNP (transition)	4.7%	13
Variants: Amon_BW.backmapping.sorted - Amon_BW	A	54961	54961	1	280	SNP (transition)	2.1%	6
Variants: Amon_BW.backmapping.sorted - Amon_BW	C	54996	54996	1	296	SNP (transition)	1.4%	4
Variants: Amon_BW.backmapping.sorted - Amon_BW	G	55006	55006	1	284	SNP (transition)	6.3%	18
Variants: Amon_BW.backmapping.sorted - Amon_BW	T	55094	55094	1	281	SNP (transition)	1.4%	4
Variants: Amon_BW.backmapping.sorted - Amon_BW	A	55324	55324	1	234	SNP (transition)	2.1%	5
Variants: Amon_BW.backmapping.sorted - Amon_BW	C	55416	55416	1	244	SNP (transition)	3.3%	8
Variants: Amon_BW.backmapping.sorted - Amon_BW	G	55960	55960	1	312	SNP (transversion)	1.9%	6
Variants: Amon_BW.backmapping.sorted - Amon_BW	A	56128	56128	1	271	SNP (transition)	1.5%	4
Variants: Amon_BW.backmapping.sorted - Amon_BW	T	56781	56781	1	249	SNP (transversion)	3.6%	9
Variants: Amon_BW.backmapping.sorted - Amon_BW	T	56797	56797	1	263	SNP (transversion)	3.4%	9
Variants: Amon_BW.backmapping.sorted - Amon_BW	A	56800	56800	1	262	SNP (transition)	3.4%	9
Variants: Amon_BW.backmapping.sorted - Amon_BW	T	56849	56849	1	256	SNP (transversion)	2.7%	7
Variants: Amon_BW.backmapping.sorted - Amon_BW	C	56886	56886	1	272	SNP (transition)	1.5%	4
Variants: Amon_BW.backmapping.sorted - Amon_BW	G	56930	56930	1	275	SNP (transversion)	2.5%	7
Variants: Amon_BW.backmapping.sorted - Amon_BW	C	56953	56953	1	246	SNP (transversion)	2.0%	5
Variants: Amon_BW.backmapping.sorted - Amon_BW	G	56996	56996	1	241	SNP (transversion)	1.7%	4
Variants: Amon_BW.backmapping.sorted - Amon_BW	G	57303	57303	1	213	SNP (transition)	1.9%	4
Variants: Amon_BW.backmapping.sorted - Amon_BW	A	57356	57356	1	195	SNP (transversion)	2.1%	4
Variants: Amon_BW.backmapping.sorted - Amon_BW	T	57376	57376	1	182	SNP (transition)	2.7%	5
Variants: Amon_BW.backmapping.sorted - Amon_BW	A	57442	57442	1	192	SNP (transition)	2.1%	4
Variants: Amon_BW.backmapping.sorted - Amon_BW	T	57448	57448	1	191	SNP (transition)	2.6%	5
Variants: Amon_BW.backmapping.sorted - Amon_BW	C	57474	57474	1	205	SNP (transversion)	3.9%	8
Variants: Amon_BW.backmapping.sorted - Amon_BW	G	57502	57502	1	224	SNP (transversion)	3.1%	7
Variants: Amon_BW.backmapping.sorted - Amon_BW	C	58263	58263	1	157	SNP (transition)	3.2%	5
Variants: Amon_BW.backmapping.sorted - Amon_BW	C	58353	58353	1	179	SNP (transition)	2.2%	4
Variants: Amon_BW.backmapping.sorted - Amon_BW	A	58371	58371	1	179	SNP (transversion)	2.2%	4
Variants: Amon_BW.backmapping.sorted - Amon_BW	T	58440	58440	1	176	SNP (transversion)	4.5%	8
Variants: Amon_BW.backmapping.sorted - Amon_BW	A	59316	59315	0	179	Insertion (tandem repeat)	2.8%	5
Variants: Amon_BW.backmapping.sorted - Amon_BW	C	59388	59388	1	170	SNP (transversion)	2.9%	5
Variants: Amon_BW.backmapping.sorted - Amon_BW	A	59424	59424	1	179	SNP (transversion)	4.5%	8
Variants: Amon_BW.backmapping.sorted - Amon_BW	T	59479	59479	1	161	SNP (transversion)	3.7%	6
Variants: Amon_BW.backmapping.sorted - Amon_BW	A	60354	60353	0	159	Insertion (tandem repeat)	3.1%	5
Variants: Amon_BW.backmapping.sorted - Amon_BW	A	60435	60435	1	152	SNP (transversion)	5.3%	8
Variants: Amon_BW.backmapping.sorted - Amon_BW	A	60480	60480	1	159	SNP (transition)	6.9%	11
Variants: Amon_BW.backmapping.sorted - Amon_BW	A	60506	60505	0	158	Insertion (tandem repeat)	7.6%	12
Variants: Amon_BW.backmapping.sorted - Amon_BW	A	60522	60522	1	163	SNP (transition)	7.4%	12
Variants: Amon_BW.backmapping.sorted - Amon_BW	G	60630	60630	1	163	SNP (transversion)	3.7%	6
Variants: Amon_BW.backmapping.sorted - Amon_BW	A	60637	60637	1	161	SNP (transition)	2.5%	4
Variants: Amon_BW.backmapping.sorted - Amon_BW	A	60727	60727	1	164	SNP (transition)	3.0%	5
Variants: Amon_BW.backmapping.sorted - Amon_BW	A	60780	60780	1	155	SNP (transversion)	5.2%	8
Variants: Amon_BW.backmapping.sorted - Amon_BW	A	60915	60915	1	164	SNP (transversion)	2.4%	4
Variants: Amon_BW.backmapping.sorted - Amon_BW	GT	60961	60962	2	152 -> 155	Substitution	10.3% -> 10.5%	16
Variants: Amon_BW.backmapping.sorted - Amon_BW	A	61154	61154	1	181	SNP (transversion)	2.8%	5
Variants: Amon_BW.backmapping.sorted - Amon_BW	A	61195	61195	1	174	SNP (transition)	4.0%	7
Variants: Amon_BW.backmapping.sorted - Amon_BW	A	61475	61475	1	173	SNP (transition)	2.9%	5
Variants: Amon_BW.backmapping.sorted - Amon_BW	C	61493	61493	1	171	SNP (transversion)	3.5%	6
Variants: Amon_BW.backmapping.sorted - Amon_BW	T	61706	61706	1	146	SNP (transversion)	6.2%	9
Variants: Amon_BW.backmapping.sorted - Amon_BW	AGTAA	61816	61815	0	166	Insertion	4.8%	8
Variants: Amon_BW.backmapping.sorted - Amon_BW	A	62120	62120	1	145	SNP (transition)	2.8%	4
Variants: Amon_BW.backmapping.sorted - Amon_BW	G	62435	62435	1	170	SNP (transversion)	2.4%	4
Variants: Amon_BW.backmapping.sorted - Amon_BW	G	62464	62464	1	171	SNP (transition)	2.3%	4
Variants: Amon_BW.backmapping.sorted - Amon_BW	A	62468	62468	1	171	SNP (transition)	2.3%	4
Variants: Amon_BW.backmapping.sorted - Amon_BW	C	62514	62514	1	168	SNP (transversion)	2.4%	4
Variants: Amon_BW.backmapping.sorted - Amon_BW	G	62518	62518	1	168	SNP (transition)	3.6%	6
Variants: Amon_BW.backmapping.sorted - Amon_BW	G	63374	63374	1	156	SNP (transversion)	5.8%	9
Variants: Amon_BW.backmapping.sorted - Amon_BW	T	63785	63785	1	180	SNP (transition)	2.2%	4
Variants: Amon_BW.backmapping.sorted - Amon_BW	T	63872	63872	1	183	SNP (transition)	2.2%	4
Variants: Amon_BW.backmapping.sorted - Amon_BW	C	64668	64668	1	148	SNP (transversion)	6.1%	9
Variants: Amon_BW.backmapping.sorted - Amon_BW	A	64822	64822	1	179	SNP (transversion)	8.9%	16
Variants: Amon_BW.backmapping.sorted - Amon_BW	T	64961	64961	1	169	SNP (transition)	5.3%	9
Variants: Amon_BW.backmapping.sorted - Amon_BW	T	64968	64968	1	172	SNP (transversion)	8.1%	14
Variants: Amon_BW.backmapping.sorted - Amon_BW	A	65043	65043	1	190	SNP (transition)	3.2%	6
Variants: Amon_BW.backmapping.sorted - Amon_BW		65188	65188	1	159	Deletion (tandem repeat)	7.5%	12
Variants: Amon_BW.backmapping.sorted - Amon_BW	T	65188	65187	0	159	Insertion (tandem repeat)	5.7%	9
Variants: Amon_BW.backmapping.sorted - Amon_BW	C	65287	65287	1	171	SNP (transversion)	3.5%	6
Variants: Amon_BW.backmapping.sorted - Amon_BW	A	65311	65311	1	170	SNP (transition)	4.7%	8
Variants: Amon_BW.backmapping.sorted - Amon_BW		65341	65341	1	177	Deletion	10.2%	18
Variants: Amon_BW.backmapping.sorted - Amon_BW		65342	65342	1	177	Deletion (tandem repeat)	11.3%	20
Variants: Amon_BW.backmapping.sorted - Amon_BW	A	65342	65341	0	177	Insertion (tandem repeat)	2.3%	4
Variants: Amon_BW.backmapping.sorted - Amon_BW	C	65512	65512	1	179	SNP (transversion)	4.5%	8
Variants: Amon_BW.backmapping.sorted - Amon_BW	A	65578	65578	1	187	SNP (transversion)	2.7%	5
Variants: Amon_BW.backmapping.sorted - Amon_BW	T	65606	65606	1	179	SNP (transition)	2.8%	5
Variants: Amon_BW.backmapping.sorted - Amon_BW	T	65664	65664	1	185	SNP (transversion)	2.2%	4
Variants: Amon_BW.backmapping.sorted - Amon_BW	A	65751	65751	1	175	SNP (transition)	6.3%	11
Variants: Amon_BW.backmapping.sorted - Amon_BW	T	65844	65844	1	149	SNP (transition)	3.4%	5
Variants: Amon_BW.backmapping.sorted - Amon_BW	A	65881	65881	1	162	SNP (transversion)	3.7%	6
Variants: Amon_BW.backmapping.sorted - Amon_BW	T	66151	66151	1	147	SNP (transversion)	6.1%	9
Variants: Amon_BW.backmapping.sorted - Amon_BW	G	66158	66158	1	143	SNP (transition)	6.3%	9
Variants: Amon_BW.backmapping.sorted - Amon_BW	G	66220	66220	1	143	SNP (transversion)	3.5%	5
Variants: Amon_BW.backmapping.sorted - Amon_BW	GT	66308	66309	2	153 -> 155	Substitution	2.6%	4
Variants: Amon_BW.backmapping.sorted - Amon_BW	A	66486	66486	1	134	SNP (transition)	3.7%	5
Variants: Amon_BW.backmapping.sorted - Amon_BW	A	66526	66526	1	145	SNP (transition)	2.8%	4
Variants: Amon_BW.backmapping.sorted - Amon_BW	C	66605	66605	1	140	SNP (transition)	5.7%	8
Variants: Amon_BW.backmapping.sorted - Amon_BW	C	66800	66800	1	154	SNP (transversion)	3.2%	5
Variants: Amon_BW.backmapping.sorted - Amon_BW	A	66802	66802	1	144	SNP (transition)	2.8%	4
Variants: Amon_BW.backmapping.sorted - Amon_BW	T	66817	66817	1	143	SNP (transversion)	4.9%	7
Variants: Amon_BW.backmapping.sorted - Amon_BW	A	66835	66835	1	153	SNP (transversion)	2.6%	4
Variants: Amon_BW.backmapping.sorted - Amon_BW	T	66952	66951	0	154	Insertion (tandem repeat)	3.9%	6
Variants: Amon_BW.backmapping.sorted - Amon_BW	A	66978	66978	1	146	SNP (transition)	4.8%	7
Variants: Amon_BW.backmapping.sorted - Amon_BW	A	66993	66993	1	154	SNP (transition)	4.5%	7
Variants: Amon_BW.backmapping.sorted - Amon_BW	T	67021	67021	1	151	SNP (transition)	5.3%	8
Variants: Amon_BW.backmapping.sorted - Amon_BW	A	67058	67058	1	169	SNP (transition)	4.7%	8
Variants: Amon_BW.backmapping.sorted - Amon_BW	A	67157	67157	1	214	SNP (transition)	4.2%	9
Variants: Amon_BW.backmapping.sorted - Amon_BW	A	67330	67330	1	167	SNP (transition)	6.0%	10
Variants: Amon_BW.backmapping.sorted - Amon_BW	A	67431	67431	1	172	SNP (transition)	4.1%	7
Variants: Amon_BW.backmapping.sorted - Amon_BW	A	67462	67462	1	176	SNP (transversion)	3.4%	6
Variants: Amon_BW.backmapping.sorted - Amon_BW	T	67539	67539	1	171	SNP (transition)	3.5%	6
Variants: Amon_BW.backmapping.sorted - Amon_BW	G	67632	67632	1	170	SNP (transition)	2.4%	4
Variants: Amon_BW.backmapping.sorted - Amon_BW	T	68332	68332	1	191	SNP (transition)	2.6%	5
Variants: Amon_BW.backmapping.sorted - Amon_BW	A	68538	68538	1	201	SNP (transversion)	2.5%	5
Variants: Amon_BW.backmapping.sorted - Amon_BW	A	68840	68840	1	159	SNP (transversion)	3.8%	6
Variants: Amon_BW.backmapping.sorted - Amon_BW	G	68913	68913	1	186	SNP (transition)	3.8%	7
Variants: Amon_BW.backmapping.sorted - Amon_BW	A	68938	68937	0	192	Insertion (tandem repeat)	3.6%	7
Variants: Amon_BW.backmapping.sorted - Amon_BW	A	68941	68941	1	198	SNP (transition)	3.5%	7
Variants: Amon_BW.backmapping.sorted - Amon_BW	T	69054	69054	1	186	SNP (transition)	4.3%	8
Variants: Amon_BW.backmapping.sorted - Amon_BW	A	69351	69351	1	207	SNP (transition)	1.9%	4
Variants: Amon_BW.backmapping.sorted - Amon_BW	T	69410	69409	0	200	Insertion (tandem repeat)	2.0%	4
Variants: Amon_BW.backmapping.sorted - Amon_BW	GTTC	69410	69409	0	200	Insertion	2.0%	4
Variants: Amon_BW.backmapping.sorted - Amon_BW	G	69686	69686	1	221	SNP (transversion)	2.7%	6
Variants: Amon_BW.backmapping.sorted - Amon_BW	T	69941	69941	1	208	SNP (transition)	1.9%	4
Variants: Amon_BW.backmapping.sorted - Amon_BW	A	70006	70006	1	226	SNP (transition)	3.1%	7
Variants: Amon_BW.backmapping.sorted - Amon_BW	G	70041	70041	1	206	SNP (transition)	3.9%	8
Variants: Amon_BW.backmapping.sorted - Amon_BW	A	70069	70069	1	200	SNP (transition)	3.0%	6
Variants: Amon_BW.backmapping.sorted - Amon_BW		70316	70316	1	204	Deletion (tandem repeat)	9.8%	20
Variants: Amon_BW.backmapping.sorted - Amon_BW	T	70316	70315	0	203	Insertion (tandem repeat)	3.4%	7
Variants: Amon_BW.backmapping.sorted - Amon_BW	C	70355	70355	1	210	SNP (transition)	3.8%	8
Variants: Amon_BW.backmapping.sorted - Amon_BW	A	70385	70385	1	216	SNP (transition)	2.3%	5
Variants: Amon_BW.backmapping.sorted - Amon_BW	T	70439	70439	1	200	SNP (transition)	2.5%	5
Variants: Amon_BW.backmapping.sorted - Amon_BW	G	70527	70527	1	176	SNP (transition)	3.4%	6
Variants: Amon_BW.backmapping.sorted - Amon_BW	G	70824	70824	1	212	SNP (transversion)	3.3%	7
Variants: Amon_BW.backmapping.sorted - Amon_BW		71279	71279	1	196	Deletion (tandem repeat)	7.1%	14
Variants: Amon_BW.backmapping.sorted - Amon_BW	T	71279	71278	0	194	Insertion (tandem repeat)	3.1%	6
Variants: Amon_BW.backmapping.sorted - Amon_BW	T	71389	71389	1	239	SNP (transition)	7.1%	17
Variants: Amon_BW.backmapping.sorted - Amon_BW	T	71592	71592	1	223	SNP (transversion)	3.1%	7
Variants: Amon_BW.backmapping.sorted - Amon_BW	T	71619	71619	1	238	SNP (transversion)	2.9%	7
Variants: Amon_BW.backmapping.sorted - Amon_BW	C	71652	71652	1	242	SNP (transversion)	2.5%	6
Variants: Amon_BW.backmapping.sorted - Amon_BW	C	71761	71761	1	250	SNP (transversion)	3.6%	9
Variants: Amon_BW.backmapping.sorted - Amon_BW	A	71817	71817	1	238	SNP (transversion)	2.5%	6
Variants: Amon_BW.backmapping.sorted - Amon_BW	A	72147	72147	1	223	SNP (transition)	1.8%	4
Variants: Amon_BW.backmapping.sorted - Amon_BW	A	72243	72243	1	232	SNP (transversion)	2.6%	6
Variants: Amon_BW.backmapping.sorted - Amon_BW	T	72329	72329	1	243	SNP (transition)	1.6%	4
Variants: Amon_BW.backmapping.sorted - Amon_BW	A	72566	72566	1	274	SNP (transition)	2.2%	6
Variants: Amon_BW.backmapping.sorted - Amon_BW	A	72605	72605	1	296	SNP (transversion)	1.7%	5
Variants: Amon_BW.backmapping.sorted - Amon_BW	T	72657	72657	1	285	SNP (transition)	2.1%	6
Variants: Amon_BW.backmapping.sorted - Amon_BW	A	72772	72772	1	248	SNP (transition)	6.0%	15
Variants: Amon_BW.backmapping.sorted - Amon_BW	T	72879	72879	1	253	SNP (transversion)	3.2%	8
Variants: Amon_BW.backmapping.sorted - Amon_BW	A	72893	72893	1	253	SNP (transversion)	2.8%	7
Variants: Amon_BW.backmapping.sorted - Amon_BW	C	73201	73201	1	238	SNP (transversion)	2.5%	6
Variants: Amon_BW.backmapping.sorted - Amon_BW	T	73285	73285	1	208	SNP (transition)	3.4%	7
Variants: Amon_BW.backmapping.sorted - Amon_BW	C	73321	73321	1	193	SNP (transition)	2.6%	5
Variants: Amon_BW.backmapping.sorted - Amon_BW	A	73403	73403	1	214	SNP (transition)	2.3%	5
Variants: Amon_BW.backmapping.sorted - Amon_BW	T	73422	73422	1	213	SNP (transition)	4.2%	9
Variants: Amon_BW.backmapping.sorted - Amon_BW	T	73450	73450	1	231	SNP (transition)	2.2%	5
Variants: Amon_BW.backmapping.sorted - Amon_BW	T	73600	73600	1	245	SNP (transition)	3.3%	8
Variants: Amon_BW.backmapping.sorted - Amon_BW	G	73756	73756	1	207	SNP (transversion)	2.9%	6
Variants: Amon_BW.backmapping.sorted - Amon_BW	T	73801	73800	0	202	Insertion (tandem repeat)	2.5%	5
Variants: Amon_BW.backmapping.sorted - Amon_BW		73997	73997	1	187	Deletion (tandem repeat)	4.8%	9
Variants: Amon_BW.backmapping.sorted - Amon_BW	A	73997	73996	0	186	Insertion (tandem repeat)	2.7%	5
Variants: Amon_BW.backmapping.sorted - Amon_BW	A	74144	74144	1	186	SNP (transition)	6.5%	12
Variants: Amon_BW.backmapping.sorted - Amon_BW	G	74150	74150	1	183	SNP (transition)	6.6%	12
Variants: Amon_BW.backmapping.sorted - Amon_BW	C	74271	74271	1	189	SNP (transition)	6.3%	12
Variants: Amon_BW.backmapping.sorted - Amon_BW	C	74463	74463	1	191	SNP (transition)	2.6%	5
Variants: Amon_BW.backmapping.sorted - Amon_BW	A	74514	74514	1	221	SNP (transition)	3.6%	8
Variants: Amon_BW.backmapping.sorted - Amon_BW	T	74617	74617	1	223	SNP (transition)	2.7%	6
Variants: Amon_BW.backmapping.sorted - Amon_BW	C	74625	74625	1	220	SNP (transition)	2.7%	6
Variants: Amon_BW.backmapping.sorted - Amon_BW	T	74643	74643	1	210	SNP (transition)	2.9%	6
Variants: Amon_BW.backmapping.sorted - Amon_BW	A	75729	75729	1	258	SNP (transition)	3.1%	8
Variants: Amon_BW.backmapping.sorted - Amon_BW	A	76067	76067	1	272	SNP (transversion)	1.5%	4
Variants: Amon_BW.backmapping.sorted - Amon_BW	T	76349	76349	1	254	SNP (transition)	2.4%	6
Variants: Amon_BW.backmapping.sorted - Amon_BW	G	76934	76934	1	296	SNP (transition)	1.7%	5
Variants: Amon_BW.backmapping.sorted - Amon_BW	T	76994	76994	1	302	SNP (transition)	3.3%	10
Variants: Amon_BW.backmapping.sorted - Amon_BW	T	77222	77222	1	304	SNP (transition)	4.3%	13
Variants: Amon_BW.backmapping.sorted - Amon_BW	A	77272	77272	1	313	SNP (transition)	3.5%	11
Variants: Amon_BW.backmapping.sorted - Amon_BW	A	77291	77291	1	315	SNP (transition)	1.9%	6
Variants: Amon_BW.backmapping.sorted - Amon_BW	A	77293	77293	1	317	SNP (transition)	3.5%	11
Variants: Amon_BW.backmapping.sorted - Amon_BW	A	77352	77352	1	330	SNP (transition)	2.4%	8
Variants: Amon_BW.backmapping.sorted - Amon_BW	T	77451	77450	0	319	Insertion (tandem repeat)	1.9%	6
Variants: Amon_BW.backmapping.sorted - Amon_BW	A	77625	77624	0	323	Insertion (tandem repeat)	3.7%	12
Variants: Amon_BW.backmapping.sorted - Amon_BW	T	77686	77686	1	350	SNP (transversion)	2.3%	8
Variants: Amon_BW.backmapping.sorted - Amon_BW		77869	77869	1	358	Deletion (tandem repeat)	3.4%	12
Variants: Amon_BW.backmapping.sorted - Amon_BW	T	77869	77868	0	357	Insertion (tandem repeat)	2.5%	9
Variants: Amon_BW.backmapping.sorted - Amon_BW	G	77936	77936	1	385	SNP (transition)	4.4%	17
Variants: Amon_BW.backmapping.sorted - Amon_BW	G	77959	77959	1	398	SNP (transition)	2.0%	8
Variants: Amon_BW.backmapping.sorted - Amon_BW	T	77984	77984	1	399	SNP (transversion)	1.5%	6
Variants: Amon_BW.backmapping.sorted - Amon_BW	T	78010	78010	1	413	SNP (transversion)	2.4%	10
Variants: Amon_BW.backmapping.sorted - Amon_BW	A	78041	78041	1	410	SNP (transversion)	2.0%	8
Variants: Amon_BW.backmapping.sorted - Amon_BW	T	78064	78064	1	409	SNP (transition)	1.7%	7
Variants: Amon_BW.backmapping.sorted - Amon_BW	G	78068	78068	1	408	SNP (transition)	2.5%	10
Variants: Amon_BW.backmapping.sorted - Amon_BW	C	78102	78102	1	402	SNP (transition)	2.2%	9
Variants: Amon_BW.backmapping.sorted - Amon_BW	T	78123	78123	1	403	SNP (transition)	1.5%	6
Variants: Amon_BW.backmapping.sorted - Amon_BW	T	78129	78129	1	402	SNP (transversion)	3.0%	12
Variants: Amon_BW.backmapping.sorted - Amon_BW	A	78131	78131	1	398	SNP (transversion)	2.0%	8
Variants: Amon_BW.backmapping.sorted - Amon_BW	T	78242	78242	1	403	SNP (transition)	3.0%	12
Variants: Amon_BW.backmapping.sorted - Amon_BW	T	78260	78260	1	423	SNP (transition)	1.9%	8
Variants: Amon_BW.backmapping.sorted - Amon_BW	C	78450	78450	1	437	SNP (transversion)	1.6%	7
Variants: Amon_BW.backmapping.sorted - Amon_BW	T	78955	78955	1	505	SNP (transition)	2.4%	12
Variants: Amon_BW.backmapping.sorted - Amon_BW	T	78974	78974	1	512	SNP (transition)	3.1%	16
Variants: Amon_BW.backmapping.sorted - Amon_BW	A	78992	78992	1	502	SNP (transition)	1.4%	7
Variants: Amon_BW.backmapping.sorted - Amon_BW	T	79208	79208	1	594	SNP (transition)	3.2%	19
Variants: Amon_BW.backmapping.sorted - Amon_BW	C	79214	79214	1	573	SNP (transversion)	1.2%	7
Variants: Amon_BW.backmapping.sorted - Amon_BW	A	79403	79403	1	498	SNP (transversion)	2.2%	11
Variants: Amon_BW.backmapping.sorted - Amon_BW	T	79458	79458	1	501	SNP (transition)	1.6%	8
Variants: Amon_BW.backmapping.sorted - Amon_BW	C	79595	79595	1	452	SNP (transversion)	1.5%	7
Variants: Amon_BW.backmapping.sorted - Amon_BW	A	79614	79614	1	432	SNP (transition)	1.4%	6
Variants: Amon_BW.backmapping.sorted - Amon_BW	T	79709	79709	1	425	SNP (transition)	5.6%	24
Variants: Amon_BW.backmapping.sorted - Amon_BW	G	80015	80015	1	378	SNP (transversion)	1.3%	5
Variants: Amon_BW.backmapping.sorted - Amon_BW	T	80077	80077	1	371	SNP (transversion)	1.6%	6
Variants: Amon_BW.backmapping.sorted - Amon_BW	C	80151	80151	1	375	SNP (transversion)	2.9%	11
Variants: Amon_BW.backmapping.sorted - Amon_BW	T	80221	80221	1	380	SNP (transversion)	1.3%	5
Variants: Amon_BW.backmapping.sorted - Amon_BW	T	80383	80383	1	385	SNP (transversion)	1.6%	6
Variants: Amon_BW.backmapping.sorted - Amon_BW	T	80469	80469	1	344	SNP (transversion)	5.2%	18
Variants: Amon_BW.backmapping.sorted - Amon_BW	A	80591	80591	1	326	SNP (transversion)	1.2%	4
Variants: Amon_BW.backmapping.sorted - Amon_BW	A	80744	80744	1	305	SNP (transition)	2.0%	6
Variants: Amon_BW.backmapping.sorted - Amon_BW	G	80792	80792	1	301	SNP (transition)	3.7%	11
Variants: Amon_BW.backmapping.sorted - Amon_BW	C	80971	80971	1	315	SNP (transversion)	1.9%	6
Variants: Amon_BW.backmapping.sorted - Amon_BW	A	80980	80980	1	308	SNP (transversion)	1.9%	6
Variants: Amon_BW.backmapping.sorted - Amon_BW	C	81020	81020	1	290	SNP (transversion)	2.1%	6
Variants: Amon_BW.backmapping.sorted - Amon_BW	T	81193	81193	1	303	SNP (transition)	2.6%	8
Variants: Amon_BW.backmapping.sorted - Amon_BW	T	81207	81207	1	297	SNP (transversion)	2.7%	8
Variants: Amon_BW.backmapping.sorted - Amon_BW	C	81361	81361	1	293	SNP (transversion)	2.0%	6
Variants: Amon_BW.backmapping.sorted - Amon_BW	A	81368	81368	1	290	SNP (transition)	1.4%	4
Variants: Amon_BW.backmapping.sorted - Amon_BW	A	81490	81490	1	287	SNP (transversion)	1.4%	4
Variants: Amon_BW.backmapping.sorted - Amon_BW	T	81713	81713	1	296	SNP (transition)	2.0%	6
Variants: Amon_BW.backmapping.sorted - Amon_BW	T	81759	81759	1	275	SNP (transversion)	2.5%	7
Variants: Amon_BW.backmapping.sorted - Amon_BW	T	81788	81788	1	255	SNP (transversion)	1.6%	4
Variants: Amon_BW.backmapping.sorted - Amon_BW	G	81833	81833	1	277	SNP (transversion)	2.2%	6
Variants: Amon_BW.backmapping.sorted - Amon_BW	T	81899	81899	1	274	SNP (transition)	2.6%	7
Variants: Amon_BW.backmapping.sorted - Amon_BW	A	81945	81945	1	285	SNP (transition)	1.8%	5
Variants: Amon_BW.backmapping.sorted - Amon_BW	G	82058	82058	1	285	SNP (transversion)	2.1%	6
Variants: Amon_BW.backmapping.sorted - Amon_BW	A	82087	82087	1	286	SNP (transversion)	2.1%	6
Variants: Amon_BW.backmapping.sorted - Amon_BW	T	82407	82406	0	253	Insertion (tandem repeat)	4.7%	12
Variants: Amon_BW.backmapping.sorted - Amon_BW	C	82468	82468	1	251	SNP (transition)	2.4%	6
Variants: Amon_BW.backmapping.sorted - Amon_BW	A	82470	82470	1	249	SNP (transition)	2.4%	6
Variants: Amon_BW.backmapping.sorted - Amon_BW	G	82499	82499	1	234	SNP (transversion)	2.6%	6
Variants: Amon_BW.backmapping.sorted - Amon_BW	A	82888	82888	1	259	SNP (transition)	1.9%	5
Variants: Amon_BW.backmapping.sorted - Amon_BW	T	83072	83072	1	250	SNP (transversion)	2.0%	5
Variants: Amon_BW.backmapping.sorted - Amon_BW	A	83152	83152	1	279	SNP (transversion)	1.4%	4
Variants: Amon_BW.backmapping.sorted - Amon_BW	A	83152	83152	1	279	SNP (transversion)	1.4%	4
Variants: Amon_BW.backmapping.sorted - Amon_BW	A	83348	83348	1	243	SNP (transition)	2.9%	7
Variants: Amon_BW.backmapping.sorted - Amon_BW	A	83420	83420	1	238	SNP (transition)	2.5%	6
Variants: Amon_BW.backmapping.sorted - Amon_BW	A	83426	83426	1	245	SNP (transition)	2.0%	5
Variants: Amon_BW.backmapping.sorted - Amon_BW	C	83485	83485	1	273	SNP (transversion)	7.3%	20
Variants: Amon_BW.backmapping.sorted - Amon_BW	C	83576	83576	1	280	SNP (transition)	2.5%	7
Variants: Amon_BW.backmapping.sorted - Amon_BW	T	83645	83644	0	255	Insertion	2.0%	5
Variants: Amon_BW.backmapping.sorted - Amon_BW	G	108788	108788	1	626	SNP (transversion)	1.8%	11
Variants: Amon_BW.backmapping.sorted - Amon_BW	C	108841	108841	1	566	SNP (transition)	2.3%	13
Variants: Amon_BW.backmapping.sorted - Amon_BW	T	108897	108897	1	558	SNP (transversion)	3.4%	19
Variants: Amon_BW.backmapping.sorted - Amon_BW	G	109544	109544	1	451	SNP (transition)	2.7%	12
Variants: Amon_BW.backmapping.sorted - Amon_BW	G	109600	109600	1	414	SNP (transversion)	4.3%	18
Variants: Amon_BW.backmapping.sorted - Amon_BW	A	109693	109693	1	382	SNP (transversion)	2.9%	11
Variants: Amon_BW.backmapping.sorted - Amon_BW	A	109737	109736	0	374	Insertion (tandem repeat)	5.6%	21
Variants: Amon_BW.backmapping.sorted - Amon_BW	A	110305	110304	0	317	Insertion (tandem repeat)	2.2%	7
Variants: Amon_BW.backmapping.sorted - Amon_BW	C	110332	110332	1	324	SNP (transversion)	1.9%	6
Variants: Amon_BW.backmapping.sorted - Amon_BW	A	110382	110382	1	323	SNP (transversion)	1.9%	6
Variants: Amon_BW.backmapping.sorted - Amon_BW	T	110499	110499	1	287	SNP (transversion)	1.7%	5
Variants: Amon_BW.backmapping.sorted - Amon_BW	T	110555	110555	1	274	SNP (transversion)	2.9%	8
Variants: Amon_BW.backmapping.sorted - Amon_BW	A	110681	110681	1	285	SNP (transition)	2.5%	7
Variants: Amon_BW.backmapping.sorted - Amon_BW		110839	110839	1	320	Deletion (tandem repeat)	7.5%	24
Variants: Amon_BW.backmapping.sorted - Amon_BW	A	110839	110838	0	316	Insertion (tandem repeat)	2.5%	8
Variants: Amon_BW.backmapping.sorted - Amon_BW	T	111021	111021	1	298	SNP (transition)	2.0%	6
Variants: Amon_BW.backmapping.sorted - Amon_BW	C	111063	111063	1	296	SNP (transversion)	2.7%	8
Variants: Amon_BW.backmapping.sorted - Amon_BW	A	111119	111118	0	294	Insertion (tandem repeat)	2.4%	7
Variants: Amon_BW.backmapping.sorted - Amon_BW	A	111134	111134	1	299	SNP (transversion)	1.7%	5
Variants: Amon_BW.backmapping.sorted - Amon_BW	A	111142	111141	0	295	Insertion (tandem repeat)	2.7%	8
Variants: Amon_BW.backmapping.sorted - Amon_BW	G	111196	111196	1	318	SNP (transversion)	3.1%	10
Variants: Amon_BW.backmapping.sorted - Amon_BW	C	111245	111245	1	338	SNP (transition)	1.2%	4
Variants: Amon_BW.backmapping.sorted - Amon_BW		111845	111845	1	245	Deletion (tandem repeat)	4.5%	11
Variants: Amon_BW.backmapping.sorted - Amon_BW	A	111845	111844	0	243	Insertion (tandem repeat)	3.7%	9
Variants: Amon_BW.backmapping.sorted - Amon_BW	T	112929	112929	1	212	SNP (transition)	2.4%	5
Variants: Amon_BW.backmapping.sorted - Amon_BW	G	113011	113011	1	188	SNP (transition)	4.3%	8
Variants: Amon_BW.backmapping.sorted - Amon_BW	A	113108	113108	1	190	SNP (transversion)	3.7%	7
Variants: Amon_BW.backmapping.sorted - Amon_BW	A	113179	113178	0	204	Insertion (tandem repeat)	2.9%	6
Variants: Amon_BW.backmapping.sorted - Amon_BW	C	113198	113198	1	220	SNP (transversion)	4.1%	9
Variants: Amon_BW.backmapping.sorted - Amon_BW	AT	114103	114104	2	184 -> 187	Substitution	4.8% -> 4.9%	9
Variants: Amon_BW.backmapping.sorted - Amon_BW	A	115965	115965	1	179	SNP (transition)	2.8%	5
Variants: Amon_BW.backmapping.sorted - Amon_BW	G	116227	116227	1	175	SNP (transversion)	2.9%	5
Variants: Amon_BW.backmapping.sorted - Amon_BW	T	116256	116256	1	166	SNP (transversion)	4.2%	7
Variants: Amon_BW.backmapping.sorted - Amon_BW	G	116286	116286	1	175	SNP (transversion)	3.4%	6
Variants: Amon_BW.backmapping.sorted - Amon_BW	T	116288	116288	1	177	SNP (transition)	4.0%	7
Variants: Amon_BW.backmapping.sorted - Amon_BW	A	116319	116319	1	187	SNP (transversion)	3.2%	6
Variants: Amon_BW.backmapping.sorted - Amon_BW	C	116867	116867	1	200	SNP (transition)	2.5%	5
Variants: Amon_BW.backmapping.sorted - Amon_BW	A	116951	116951	1	201	SNP (transition)	3.0%	6
Variants: Amon_BW.backmapping.sorted - Amon_BW	A	117144	117144	1	187	SNP (transition)	2.7%	5
Variants: Amon_BW.backmapping.sorted - Amon_BW		117155	117155	1	177	Deletion (tandem repeat)	2.8%	5
Variants: Amon_BW.backmapping.sorted - Amon_BW	T	117344	117344	1	206	SNP (transition)	9.2%	19
Variants: Amon_BW.backmapping.sorted - Amon_BW	C	117632	117632	1	165	SNP (transversion)	5.5%	9
Variants: Amon_BW.backmapping.sorted - Amon_BW	A	117658	117658	1	178	SNP (transition)	3.4%	6
Variants: Amon_BW.backmapping.sorted - Amon_BW	C	117786	117786	1	200	SNP (transition)	2.5%	5
Variants: Amon_BW.backmapping.sorted - Amon_BW	A	117790	117790	1	202	SNP (transition)	4.0%	8
Variants: Amon_BW.backmapping.sorted - Amon_BW	A	117929	117929	1	190	SNP (transition)	4.7%	9
Variants: Amon_BW.backmapping.sorted - Amon_BW	A	117939	117939	1	192	SNP (transversion)	3.6%	7
Variants: Amon_BW.backmapping.sorted - Amon_BW	T	117978	117978	1	199	SNP (transition)	8.0%	16
Variants: Amon_BW.backmapping.sorted - Amon_BW	T	117992	117992	1	196	SNP (transversion)	4.6%	9
Variants: Amon_BW.backmapping.sorted - Amon_BW	T	118096	118096	1	208	SNP (transversion)	1.9%	4
Variants: Amon_BW.backmapping.sorted - Amon_BW	C	118124	118124	1	210	SNP (transversion)	6.2%	13
Variants: Amon_BW.backmapping.sorted - Amon_BW	G	118146	118146	1	207	SNP (transversion)	4.8%	10
Variants: Amon_BW.backmapping.sorted - Amon_BW	C	118210	118210	1	175	SNP (transversion)	5.1%	9
Variants: Amon_BW.backmapping.sorted - Amon_BW	G	118291	118291	1	183	SNP (transversion)	2.7%	5
Variants: Amon_BW.backmapping.sorted - Amon_BW	TA	118343	118342	0	207	Insertion (tandem repeat)	3.9%	8
Variants: Amon_BW.backmapping.sorted - Amon_BW	A	118363	118363	1	220	SNP (transition)	4.5%	10
Variants: Amon_BW.backmapping.sorted - Amon_BW	A	118406	118406	1	196	SNP (transversion)	3.1%	6
Variants: Amon_BW.backmapping.sorted - Amon_BW	C	118682	118682	1	200	SNP (transition)	2.5%	5
Variants: Amon_BW.backmapping.sorted - Amon_BW	C	118701	118701	1	202	SNP (transition)	3.0%	6
Variants: Amon_BW.backmapping.sorted - Amon_BW	T	118714	118714	1	188	SNP (transversion)	4.3%	8
Variants: Amon_BW.backmapping.sorted - Amon_BW	G	118734	118734	1	187	SNP (transition)	2.7%	5
Variants: Amon_BW.backmapping.sorted - Amon_BW	T	118873	118873	1	183	SNP (transition)	3.8%	7
Variants: Amon_BW.backmapping.sorted - Amon_BW	C	118902	118902	1	179	SNP (transversion)	3.9%	7
Variants: Amon_BW.backmapping.sorted - Amon_BW	A	119417	119417	1	218	SNP (transversion)	2.8%	6
Variants: Amon_BW.backmapping.sorted - Amon_BW	T	119454	119454	1	234	SNP (transition)	2.6%	6
Variants: Amon_BW.backmapping.sorted - Amon_BW	T	119460	119460	1	228	SNP (transversion)	2.2%	5
Variants: Amon_BW.backmapping.sorted - Amon_BW	C	119463	119463	1	230	SNP (transition)	4.3%	10
Variants: Amon_BW.backmapping.sorted - Amon_BW	T	119601	119601	1	193	SNP (transversion)	2.1%	4
Variants: Amon_BW.backmapping.sorted - Amon_BW	T	119734	119734	1	215	SNP (transition)	3.3%	7
Variants: Amon_BW.backmapping.sorted - Amon_BW	C	119823	119823	1	208	SNP (transition)	3.4%	7
Variants: Amon_BW.backmapping.sorted - Amon_BW	T	119914	119913	0	195	Insertion (tandem repeat)	2.1%	4
Variants: Amon_BW.backmapping.sorted - Amon_BW	A	119979	119979	1	212	SNP (transversion)	2.4%	5
Variants: Amon_BW.backmapping.sorted - Amon_BW	A	120078	120078	1	208	SNP (transversion)	3.4%	7
Variants: Amon_BW.backmapping.sorted - Amon_BW	T	120603	120603	1	219	SNP (transversion)	4.6%	10
Variants: Amon_BW.backmapping.sorted - Amon_BW	A	120962	120962	1	241	SNP (transversion)	2.5%	6
Variants: Amon_BW.backmapping.sorted - Amon_BW	T	120977	120977	1	229	SNP (transition)	2.6%	6
Variants: Amon_BW.backmapping.sorted - Amon_BW	C	121008	121008	1	228	SNP (transversion)	3.9%	9
Variants: Amon_BW.backmapping.sorted - Amon_BW	G	121109	121109	1	243	SNP (transversion)	1.6%	4
Variants: Amon_BW.backmapping.sorted - Amon_BW	G	121206	121206	1	250	SNP (transition)	2.0%	5
Variants: Amon_BW.backmapping.sorted - Amon_BW	TGC	121312	121314	2	243 -> 252	Substitution	2.8% -> 2.9%	7
Variants: Amon_BW.backmapping.sorted - Amon_BW	C	121314	121314	1	252	SNP (transition)	2.8%	7
Variants: Amon_BW.backmapping.sorted - Amon_BW	T	121366	121366	1	242	SNP (transversion)	5.4%	13
Variants: Amon_BW.backmapping.sorted - Amon_BW		121554	121554	1	246	Deletion (tandem repeat)	7.7%	19
Variants: Amon_BW.backmapping.sorted - Amon_BW	A	121554	121553	0	244	Insertion (tandem repeat)	2.5%	6
Variants: Amon_BW.backmapping.sorted - Amon_BW	G	122987	122987	1	426	SNP (transversion)	1.9%	8
Variants: Amon_BW.backmapping.sorted - Amon_BW	A	123158	123157	0	466	Insertion (tandem repeat)	1.1%	5
Variants: Amon_BW.backmapping.sorted - Amon_BW	T	123348	123348	1	382	SNP (transversion)	5.5%	21
Variants: Amon_BW.backmapping.sorted - Amon_BW	C	123891	123891	1	360	SNP (transversion)	1.4%	5
Variants: Amon_CH.backmapping.sorted - Amon_CH	T	1631	1630	0	199	Insertion	2.5%	5
Variants: Amon_CH.backmapping.sorted - Amon_CH		1952	1952	1	221	Deletion (tandem repeat)	6.8%	15
Variants: Amon_CH.backmapping.sorted - Amon_CH	T	2288	2287	0	197	Insertion (tandem repeat)	2.5%	5
Variants: Amon_CH.backmapping.sorted - Amon_CH		4757	4757	1	197	Deletion (tandem repeat)	11.7%	23
Variants: Amon_CH.backmapping.sorted - Amon_CH	A	4757	4756	0	193	Insertion (tandem repeat)	4.7%	9
Variants: Amon_CH.backmapping.sorted - Amon_CH	T	12942	12941	0	194	Insertion (tandem repeat)	4.6%	9
Variants: Amon_CH.backmapping.sorted - Amon_CH	A	13630	13629	0	212	Insertion (tandem repeat)	4.2%	9
Variants: Amon_CH.backmapping.sorted - Amon_CH	A	18256	18255	0	179	Insertion (tandem repeat)	3.4%	6
Variants: Amon_CH.backmapping.sorted - Amon_CH		18679	18679	1	173	Deletion (tandem repeat)	9.2%	16
Variants: Amon_CH.backmapping.sorted - Amon_CH	A	18679	18678	0	168	Insertion (tandem repeat)	7.7%	13
Variants: Amon_CH.backmapping.sorted - Amon_CH	T	20673	20673	1	191	SNP (transversion)	3.1%	6
Variants: Amon_CH.backmapping.sorted - Amon_CH	T	25242	25241	0	172	Insertion (tandem repeat)	4.1%	7
Variants: Amon_CH.backmapping.sorted - Amon_CH	T	25621	25621	1	253	SNP (transition)	7.1%	18
Variants: Amon_CH.backmapping.sorted - Amon_CH	C	25702	25702	1	286	SNP (transversion)	3.8%	11
Variants: Amon_CH.backmapping.sorted - Amon_CH	G	25776	25776	1	403	SNP (transition)	4.0%	16
Variants: Amon_CH.backmapping.sorted - Amon_CH	A	25793	25793	1	381	SNP (transition)	2.4%	9
Variants: Amon_CH.backmapping.sorted - Amon_CH	T	25809	25809	1	371	SNP (transversion)	7.0%	26
Variants: Amon_CH.backmapping.sorted - Amon_CH	T	26368	26367	0	188	Insertion (tandem repeat)	4.8%	9
Variants: Amon_CH.backmapping.sorted - Amon_CH	T	28308	28308	1	191	SNP (transversion)	15.2%	29
Variants: Amon_CH.backmapping.sorted - Amon_CH	T	28309	28308	0	188	Insertion (tandem repeat)	8.5%	16
Variants: Amon_CH.backmapping.sorted - Amon_CH	A	30114	30113	0	200	Insertion (tandem repeat)	4.0%	8
Variants: Amon_CH.backmapping.sorted - Amon_CH	T	31024	31024	1	228	SNP (transition)	2.2%	5
Variants: Amon_CH.backmapping.sorted - Amon_CH	T	31195	31194	0	194	Insertion (tandem repeat)	2.6%	5
Variants: Amon_CH.backmapping.sorted - Amon_CH	A	34973	34972	0	189	Insertion (tandem repeat)	2.6%	5
Variants: Amon_CH.backmapping.sorted - Amon_CH	T	36303	36302	0	181	Insertion (tandem repeat)	4.4%	8
Variants: Amon_CH.backmapping.sorted - Amon_CH	T	41932	41931	0	202	Insertion (tandem repeat)	10.9%	22
Variants: Amon_CH.backmapping.sorted - Amon_CH	A	46731	46730	0	194	Insertion (tandem repeat)	8.8%	17
Variants: Amon_CH.backmapping.sorted - Amon_CH	A	49599	49599	1	172	SNP (transversion)	2.3%	4
Variants: Amon_CH.backmapping.sorted - Amon_CH		50276	50276	1	223	Deletion (tandem repeat)	13.0%	29
Variants: Amon_CH.backmapping.sorted - Amon_CH	T	50276	50275	0	221	Insertion (tandem repeat)	6.3%	14
Variants: Amon_CH.backmapping.sorted - Amon_CH	C	54499	54499	1	225	SNP (transversion)	2.7%	6
Variants: Amon_CH.backmapping.sorted - Amon_CH	T	54542	54541	0	192	Insertion (tandem repeat)	4.2%	8
Variants: Amon_CH.backmapping.sorted - Amon_CH	A	54680	54679	0	177	Insertion (tandem repeat)	4.0%	7
Variants: Amon_CH.backmapping.sorted - Amon_CH	T	59233	59232	0	165	Insertion (tandem repeat)	4.8%	8
Variants: Amon_CH.backmapping.sorted - Amon_CH	A	60429	60429	1	201	SNP (transversion)	2.5%	5
Variants: Amon_CH.backmapping.sorted - Amon_CH	A	60434	60434	1	199	SNP (transversion)	2.5%	5
Variants: Amon_CH.backmapping.sorted - Amon_CH	T	63062	63061	0	208	Insertion (tandem repeat)	3.8%	8
Variants: Amon_CH.backmapping.sorted - Amon_CH	T	65182	65181	0	245	Insertion (tandem repeat)	6.9%	17
Variants: Amon_CH.backmapping.sorted - Amon_CH		70310	70310	1	213	Deletion (tandem repeat)	5.6%	12
Variants: Amon_CH.backmapping.sorted - Amon_CH	T	70310	70309	0	212	Insertion (tandem repeat)	4.2%	9
Variants: Amon_CH.backmapping.sorted - Amon_CH	A	70920	70919	0	181	Insertion (tandem repeat)	3.9%	7
Variants: Amon_CH.backmapping.sorted - Amon_CH	T	71273	71272	0	199	Insertion (tandem repeat)	3.5%	7
Variants: Amon_CH.backmapping.sorted - Amon_CH	T	77862	77861	0	202	Insertion (tandem repeat)	3.0%	6
Variants: Amon_CH.backmapping.sorted - Amon_CH	T	79702	79702	1	229	SNP (transition)	3.9%	9
Variants: Amon_CH.backmapping.sorted - Amon_CH	A	83078	83078	1	231	SNP (transition)	3.0%	7
Variants: Amon_CH.backmapping.sorted - Amon_CH	A	109730	109729	0	232	Insertion (tandem repeat)	9.1%	21
Variants: Amon_CH.backmapping.sorted - Amon_CH	T	110228	110227	0	221	Insertion (tandem repeat)	1.8%	4
Variants: Amon_CH.backmapping.sorted - Amon_CH	A	110298	110297	0	246	Insertion (tandem repeat)	2.8%	7
Variants: Amon_CH.backmapping.sorted - Amon_CH	A	110832	110831	0	246	Insertion (tandem repeat)	2.8%	7
Variants: Amon_CH.backmapping.sorted - Amon_CH		111838	111838	1	214	Deletion (tandem repeat)	5.1%	11
Variants: Amon_CH.backmapping.sorted - Amon_CH	A	111838	111837	0	213	Insertion (tandem repeat)	3.8%	8
Variants: Amon_CH.backmapping.sorted - Amon_CH	T	113353	113353	1	244	SNP (transition)	1.6%	4
Variants: Amon_CH.backmapping.sorted - Amon_CH	C	114335	114335	1	215	SNP (transversion)	1.9%	4
Variants: Amon_CH.backmapping.sorted - Amon_CH	T	114344	114344	1	212	SNP (transversion)	1.9%	4
Variants: Amon_CH.backmapping.sorted - Amon_CH	T	117337	117337	1	220	SNP (transition)	2.7%	6
Variants: Amon_CH.backmapping.sorted - Amon_CH	T	119907	119906	0	197	Insertion (tandem repeat)	4.6%	9
Variants: Amon_CH.backmapping.sorted - Amon_CH	A	121546	121546	1	243	SNP (transition)	2.1%	5
Variants: Amon_CH.backmapping.sorted - Amon_CH		121547	121547	1	245	Deletion (tandem repeat)	9.4%	23
Variants: Amon_CH.backmapping.sorted - Amon_CH	A	121547	121546	0	238	Insertion (tandem repeat)	5.5%	13
Variants: Amon_CH.backmapping.sorted - Amon_CH	G	121756	121756	1	222	SNP (transversion)	2.3%	5
Variants: Amon_CH.backmapping.sorted - Amon_CH	A	123151	123150	0	239	Insertion (tandem repeat)	2.9%	7
Variants: Amon_CH.backmapping.sorted - Amon_CH	A	123161	123161	1	241	SNP (transversion)	2.1%	5
Variants: Amon_CT.backmapping.sorted - Amon_CT	T	302	302	1	160	SNP (transversion)	3.8%	6
Variants: Amon_CT.backmapping.sorted - Amon_CT	T	1963	1963	1	142	SNP (transversion)	15.5%	22
Variants: Amon_CT.backmapping.sorted - Amon_CT	T	1964	1964	1	141	SNP (transversion)	12.8%	18
Variants: Amon_CT.backmapping.sorted - Amon_CT	TT	2299	2300	2	125 -> 127	Substitution	9.4% -> 9.6%	12
Variants: Amon_CT.backmapping.sorted - Amon_CT	T	2299	2299	1	125	SNP (transversion)	4.8%	6
Variants: Amon_CT.backmapping.sorted - Amon_CT	G	2652	2652	1	162	SNP (transversion)	2.5%	4
Variants: Amon_CT.backmapping.sorted - Amon_CT	A	4752	4752	1	123	SNP (transversion)	20.3%	25
Variants: Amon_CT.backmapping.sorted - Amon_CT	A	4757	4757	1	126	SNP (transition)	20.6%	26
Variants: Amon_CT.backmapping.sorted - Amon_CT	A	4759	4758	0	124	Insertion (tandem repeat)	8.9%	11
Variants: Amon_CT.backmapping.sorted - Amon_CT	A	7801	7801	1	165	SNP (transition)	4.2%	7
Variants: Amon_CT.backmapping.sorted - Amon_CT	A	7816	7816	1	167	SNP (transition)	4.2%	7
Variants: Amon_CT.backmapping.sorted - Amon_CT	A	8427	8427	1	166	SNP (transition)	10.8%	18
Variants: Amon_CT.backmapping.sorted - Amon_CT	T	12929	12928	0	112	Insertion (tandem repeat)	5.4%	6
Variants: Amon_CT.backmapping.sorted - Amon_CT	T	12943	12943	1	109	SNP (transversion)	16.5%	18
Variants: Amon_CT.backmapping.sorted - Amon_CT	T	12944	12944	1	108	SNP (transversion)	14.8%	16
Variants: Amon_CT.backmapping.sorted - Amon_CT	T	12945	12945	1	109	SNP (transversion)	16.5%	18
Variants: Amon_CT.backmapping.sorted - Amon_CT	T	12946	12946	1	108	SNP (transversion)	14.8%	16
Variants: Amon_CT.backmapping.sorted - Amon_CT	C	15154	15154	1	162	SNP (transversion)	3.7%	6
Variants: Amon_CT.backmapping.sorted - Amon_CT	A	15223	15223	1	153	SNP (transition)	3.3%	5
Variants: Amon_CT.backmapping.sorted - Amon_CT	C	17710	17710	1	154	SNP (transition)	2.6%	4
Variants: Amon_CT.backmapping.sorted - Amon_CT	A	22356	22356	1	173	SNP (transversion)	4.6%	8
Variants: Amon_CT.backmapping.sorted - Amon_CT	A	23154	23154	1	123	SNP (transversion)	10.6%	13
Variants: Amon_CT.backmapping.sorted - Amon_CT	T	25243	25243	1	104	SNP (transversion)	15.4%	16
Variants: Amon_CT.backmapping.sorted - Amon_CT	T	25244	25244	1	103	SNP (transversion)	20.4%	21
Variants: Amon_CT.backmapping.sorted - Amon_CT	A	25271	25271	1	108	SNP (transversion)	15.7%	17
Variants: Amon_CT.backmapping.sorted - Amon_CT	T	25609	25609	1	154	SNP (transition)	7.1%	11
Variants: Amon_CT.backmapping.sorted - Amon_CT	C	25683	25683	1	160	SNP (transition)	10.6%	17
Variants: Amon_CT.backmapping.sorted - Amon_CT	T	25797	25797	1	211	SNP (transversion)	9.0%	19
Variants: Amon_CT.backmapping.sorted - Amon_CT	C	25847	25847	1	162	SNP (transversion)	15.4%	25
Variants: Amon_CT.backmapping.sorted - Amon_CT	G	26137	26137	1	133	SNP (transversion)	3.8%	5
Variants: Amon_CT.backmapping.sorted - Amon_CT	G	26159	26159	1	136	SNP (transversion)	2.9%	4
Variants: Amon_CT.backmapping.sorted - Amon_CT	T	26356	26355	0	108	Insertion (tandem repeat)	4.6%	5
Variants: Amon_CT.backmapping.sorted - Amon_CT	T	26366	26366	1	109	SNP (transversion)	9.2%	10
Variants: Amon_CT.backmapping.sorted - Amon_CT		28100	28100	1	128	Deletion (tandem repeat)	3.1%	4
Variants: Amon_CT.backmapping.sorted - Amon_CT	G	28202	28202	1	109	SNP (transition)	3.7%	4
Variants: Amon_CT.backmapping.sorted - Amon_CT	C	28637	28637	1	155	SNP (transition)	2.6%	4
Variants: Amon_CT.backmapping.sorted - Amon_CT	T	28706	28706	1	154	SNP (transition)	3.9%	6
Variants: Amon_CT.backmapping.sorted - Amon_CT	T	31196	31196	1	108	SNP (transversion)	13.0%	14
Variants: Amon_CT.backmapping.sorted - Amon_CT	T	33064	33064	1	159	SNP (transition)	3.8%	6
Variants: Amon_CT.backmapping.sorted - Amon_CT	C	35336	35336	1	128	SNP (transversion)	4.7%	6
Variants: Amon_CT.backmapping.sorted - Amon_CT	G	35362	35362	1	124	SNP (transversion)	6.5%	8
Variants: Amon_CT.backmapping.sorted - Amon_CT	A	35389	35389	1	131	SNP (transition)	6.1%	8
Variants: Amon_CT.backmapping.sorted - Amon_CT	T	35885	35885	1	120	SNP (transversion)	5.8%	7
Variants: Amon_CT.backmapping.sorted - Amon_CT	A	36559	36559	1	145	SNP (transversion)	6.9%	10
Variants: Amon_CT.backmapping.sorted - Amon_CT	C	38687	38687	1	160	SNP (transition)	2.5%	4
Variants: Amon_CT.backmapping.sorted - Amon_CT	T	41907	41907	1	134	SNP (transversion)	9.0%	12
Variants: Amon_CT.backmapping.sorted - Amon_CT	T	41909	41909	1	129	SNP (transversion)	9.3%	12
Variants: Amon_CT.backmapping.sorted - Amon_CT	A	45293	45293	1	174	SNP (transversion)	2.3%	4
Variants: Amon_CT.backmapping.sorted - Amon_CT	G	45351	45351	1	156	SNP (transition)	3.8%	6
Variants: Amon_CT.backmapping.sorted - Amon_CT	A	46691	46691	1	133	SNP (transversion)	16.5%	22
Variants: Amon_CT.backmapping.sorted - Amon_CT	A	46693	46693	1	135	SNP (transversion)	17.8%	24
Variants: Amon_CT.backmapping.sorted - Amon_CT	A	47183	47183	1	139	SNP (transversion)	6.5%	9
Variants: Amon_CT.backmapping.sorted - Amon_CT	T	48731	48731	1	193	SNP (transition)	2.1%	4
Variants: Amon_CT.backmapping.sorted - Amon_CT		50240	50240	1	109	Deletion (tandem repeat)	8.3%	9
Variants: Amon_CT.backmapping.sorted - Amon_CT	T	50240	50239	0	109	Insertion (tandem repeat)	4.6%	5
Variants: Amon_CT.backmapping.sorted - Amon_CT	T	50255	50255	1	99	SNP (transition)	14.1%	14
Variants: Amon_CT.backmapping.sorted - Amon_CT	T	50257	50257	1	100	SNP (transversion)	23.0%	23
Variants: Amon_CT.backmapping.sorted - Amon_CT	T	50258	50258	1	102	SNP (transition)	21.6%	22
Variants: Amon_CT.backmapping.sorted - Amon_CT	T	50263	50263	1	100	SNP (transversion)	24.0%	24
Variants: Amon_CT.backmapping.sorted - Amon_CT	G	51479	51479	1	144	SNP (transversion)	2.8%	4
Variants: Amon_CT.backmapping.sorted - Amon_CT	T	54499	54499	1	107	SNP (transversion)	21.5%	23
Variants: Amon_CT.backmapping.sorted - Amon_CT	T	54501	54501	1	108	SNP (transition)	20.4%	22
Variants: Amon_CT.backmapping.sorted - Amon_CT	A	58535	58535	1	136	SNP (transition)	10.3%	14
Variants: Amon_CT.backmapping.sorted - Amon_CT	C	61443	61443	1	171	SNP (transversion)	2.3%	4
Variants: Amon_CT.backmapping.sorted - Amon_CT	C	62816	62816	1	157	SNP (transversion)	5.7%	9
Variants: Amon_CT.backmapping.sorted - Amon_CT	T	65125	65125	1	161	SNP (transition)	13.7%	22
Variants: Amon_CT.backmapping.sorted - Amon_CT	T	65126	65126	1	159	SNP (transversion)	15.7%	25
Variants: Amon_CT.backmapping.sorted - Amon_CT	T	65127	65127	1	159	SNP (transversion)	15.1%	24
Variants: Amon_CT.backmapping.sorted - Amon_CT	T	65128	65128	1	162	SNP (transversion)	15.4%	25
Variants: Amon_CT.backmapping.sorted - Amon_CT	A	65266	65266	1	151	SNP (transversion)	11.3%	17
Variants: Amon_CT.backmapping.sorted - Amon_CT	T	70216	70215	0	102	Insertion (tandem repeat)	3.9%	4
Variants: Amon_CT.backmapping.sorted - Amon_CT	T	70230	70230	1	101	SNP (transversion)	12.9%	13
Variants: Amon_CT.backmapping.sorted - Amon_CT	A	70827	70827	1	116	SNP (transversion)	15.5%	18
Variants: Amon_CT.backmapping.sorted - Amon_CT	T	77780	77780	1	118	SNP (transversion)	11.0%	13
Variants: Amon_CT.backmapping.sorted - Amon_CT	T	78030	78030	1	153	SNP (transversion)	5.2%	8
Variants: Amon_CT.backmapping.sorted - Amon_CT	T	78247	78247	1	183	SNP (transition)	2.7%	5
Variants: Amon_CT.backmapping.sorted - Amon_CT	A	78281	78281	1	176	SNP (transition)	2.3%	4
Variants: Amon_CT.backmapping.sorted - Amon_CT	A	80195	80195	1	149	SNP (transition)	2.7%	4
Variants: Amon_CT.backmapping.sorted - Amon_CT	T	80370	80370	1	148	SNP (transversion)	6.8%	10
Variants: Amon_CT.backmapping.sorted - Amon_CT	T	81493	81493	1	170	SNP (transition)	8.8%	15
Variants: Amon_CT.backmapping.sorted - Amon_CT	T	81498	81498	1	171	SNP (transversion)	9.9%	17
Variants: Amon_CT.backmapping.sorted - Amon_CT	T	81667	81667	1	168	SNP (transversion)	3.0%	5
Variants: Amon_CT.backmapping.sorted - Amon_CT	T	81731	81731	1	172	SNP (transversion)	2.3%	4
Variants: Amon_CT.backmapping.sorted - Amon_CT	T	82319	82319	1	175	SNP (transversion)	10.9%	19
Variants: Amon_CT.backmapping.sorted - Amon_CT	T	82359	82359	1	161	SNP (transversion)	6.8%	11
Variants: Amon_CT.backmapping.sorted - Amon_CT	T	82362	82362	1	161	SNP (transition)	10.6%	17
Variants: Amon_CT.backmapping.sorted - Amon_CT	T	83115	83115	1	125	SNP (transversion)	8.8%	11
Variants: Amon_CT.backmapping.sorted - Amon_CT	A	108995	108995	1	187	SNP (transition)	15.0%	28
Variants: Amon_CT.backmapping.sorted - Amon_CT	A	109004	109004	1	180	SNP (transversion)	11.1%	20
Variants: Amon_CT.backmapping.sorted - Amon_CT	A	109435	109435	1	182	SNP (transversion)	8.2%	15
Variants: Amon_CT.backmapping.sorted - Amon_CT	C	109627	109627	1	129	SNP (transition)	8.5%	11
Variants: Amon_CT.backmapping.sorted - Amon_CT	A	110087	110087	1	127	SNP (transversion)	13.4%	17
Variants: Amon_CT.backmapping.sorted - Amon_CT	G	110569	110569	1	162	SNP (transition)	3.1%	5
Variants: Amon_CT.backmapping.sorted - Amon_CT	A	111739	111739	1	128	SNP (transversion)	14.1%	18
Variants: Amon_CT.backmapping.sorted - Amon_CT	A	111740	111739	0	124	Insertion (tandem repeat)	3.2%	4
Variants: Amon_CT.backmapping.sorted - Amon_CT	A	113817	113817	1	162	SNP (transversion)	11.7%	19
Variants: Amon_CT.backmapping.sorted - Amon_CT	C	114091	114091	1	162	SNP (transition)	2.5%	4
Variants: Amon_CT.backmapping.sorted - Amon_CT	A	114732	114732	1	159	SNP (transversion)	5.7%	9
Variants: Amon_CT.backmapping.sorted - Amon_CT	G	116034	116034	1	173	SNP (transversion)	2.3%	4
Variants: Amon_CT.backmapping.sorted - Amon_CT	C	116595	116595	1	172	SNP (transition)	2.9%	5
Variants: Amon_CT.backmapping.sorted - Amon_CT	A	116846	116846	1	189	SNP (transition)	2.1%	4
Variants: Amon_CT.backmapping.sorted - Amon_CT	G	116859	116859	1	184	SNP (transition)	3.3%	6
Variants: Amon_CT.backmapping.sorted - Amon_CT	CA	116912	116913	2	196	Substitution	2.6%	5
Variants: Amon_CT.backmapping.sorted - Amon_CT	C	117322	117322	1	155	SNP (transition)	7.1%	11
Variants: Amon_CT.backmapping.sorted - Amon_CT	T	119176	119176	1	157	SNP (transversion)	10.2%	16
Variants: Amon_CT.backmapping.sorted - Amon_CT	A	120792	120792	1	155	SNP (transversion)	6.5%	10
Variants: Amon_CT.backmapping.sorted - Amon_CT	A	120797	120797	1	160	SNP (transversion)	7.5%	12
Variants: Amon_CT.backmapping.sorted - Amon_CT	A	121444	121444	1	101	SNP (transversion)	20.8%	21
Variants: Amon_CT.backmapping.sorted - Amon_CT	A	121448	121448	1	95	SNP (transition)	22.1%	21
Variants: Amon_CT.backmapping.sorted - Amon_CT		121449	121449	1	94	Deletion (tandem repeat)	7.4%	7
Variants: Amon_CT.backmapping.sorted - Amon_CT	A	122629	122629	1	149	SNP (transversion)	9.4%	14
Variants: Amon_CT.backmapping.sorted - Amon_CT	T	126142	126142	1	157	SNP (transversion)	3.2%	5
Variants: Amon_CT.backmapping.sorted - Amon_CT	C	126147	126147	1	160	SNP (transversion)	6.3%	10
Variants: Amon_CT.backmapping.sorted - Amon_CT	C	126195	126195	1	171	SNP (transition)	3.5%	6
Variants: Amon_CT.backmapping.sorted - Amon_CT	T	126220	126220	1	169	SNP (transversion)	3.0%	5
Variants: Amon_DK.backmapping.sorted - Amon_DK	T	653	653	1	249	SNP (transition)	2.4%	6
Variants: Amon_DK.backmapping.sorted - Amon_DK	T	678	678	1	234	SNP (transition)	2.1%	5
Variants: Amon_DK.backmapping.sorted - Amon_DK	T	755	755	1	134	SNP (transition)	4.5%	6
Variants: Amon_DK.backmapping.sorted - Amon_DK	C	820	820	1	159	SNP (transition)	2.5%	4
Variants: Amon_DK.backmapping.sorted - Amon_DK	A	1063	1063	1	188	SNP (transition)	2.1%	4
Variants: Amon_DK.backmapping.sorted - Amon_DK	G	1071	1071	1	204	SNP (transition)	2.0%	4
Variants: Amon_DK.backmapping.sorted - Amon_DK	A	1321	1321	1	280	SNP (transversion)	2.5%	7
Variants: Amon_DK.backmapping.sorted - Amon_DK	C	1394	1394	1	269	SNP (transition)	1.5%	4
Variants: Amon_DK.backmapping.sorted - Amon_DK	C	1534	1534	1	251	SNP (transition)	1.6%	4
Variants: Amon_DK.backmapping.sorted - Amon_DK	C	1591	1591	1	212	SNP (transversion)	3.3%	7
Variants: Amon_DK.backmapping.sorted - Amon_DK	C	1764	1764	1	192	SNP (transition)	2.1%	4
Variants: Amon_DK.backmapping.sorted - Amon_DK		1952	1952	1	163	Deletion (tandem repeat)	11.7%	19
Variants: Amon_DK.backmapping.sorted - Amon_DK	T	1952	1951	0	161	Insertion (tandem repeat)	6.8%	11
Variants: Amon_DK.backmapping.sorted - Amon_DK	T	1963	1963	1	159	SNP (transversion)	10.7%	17
Variants: Amon_DK.backmapping.sorted - Amon_DK	T	1964	1964	1	159	SNP (transversion)	14.5%	23
Variants: Amon_DK.backmapping.sorted - Amon_DK		2288	2288	1	172	Deletion (tandem repeat)	23.3%	40
Variants: Amon_DK.backmapping.sorted - Amon_DK	T	2288	2287	0	172	Insertion (tandem repeat)	5.2%	9
Variants: Amon_DK.backmapping.sorted - Amon_DK	T	2299	2299	1	181	SNP (transversion)	9.4%	17
Variants: Amon_DK.backmapping.sorted - Amon_DK	C	2969	2969	1	250	SNP (transition)	1.6%	4
Variants: Amon_DK.backmapping.sorted - Amon_DK	G	2987	2987	1	247	SNP (transition)	2.0%	5
Variants: Amon_DK.backmapping.sorted - Amon_DK	C	3828	3828	1	262	SNP (transition)	1.5%	4
Variants: Amon_DK.backmapping.sorted - Amon_DK	T	4010	4010	1	266	SNP (transition)	3.4%	9
Variants: Amon_DK.backmapping.sorted - Amon_DK	A	4051	4051	1	311	SNP (transversion)	1.9%	6
Variants: Amon_DK.backmapping.sorted - Amon_DK	A	4331	4331	1	242	SNP (transversion)	7.0%	17
Variants: Amon_DK.backmapping.sorted - Amon_DK	A	4332	4332	1	238	SNP (transversion)	6.7%	16
Variants: Amon_DK.backmapping.sorted - Amon_DK	T	4410	4410	1	154	SNP (transversion)	2.6%	4
Variants: Amon_DK.backmapping.sorted - Amon_DK	A	4757	4757	1	167	SNP (transversion)	13.2%	22
Variants: Amon_DK.backmapping.sorted - Amon_DK		4758	4758	1	167	Deletion (tandem repeat)	22.2%	37
Variants: Amon_DK.backmapping.sorted - Amon_DK	A	4758	4757	0	167	Insertion (tandem repeat)	9.0%	15
Variants: Amon_DK.backmapping.sorted - Amon_DK		5577	5577	1	188	Deletion (tandem repeat)	4.8%	9
Variants: Amon_DK.backmapping.sorted - Amon_DK	C	6912	6912	1	323	SNP (transversion)	1.2%	4
Variants: Amon_DK.backmapping.sorted - Amon_DK	G	7024	7024	1	349	SNP (transition)	1.1%	4
Variants: Amon_DK.backmapping.sorted - Amon_DK	T	7540	7540	1	291	SNP (transversion)	2.1%	6
Variants: Amon_DK.backmapping.sorted - Amon_DK		7651	7651	1	301	Deletion (tandem repeat)	3.7%	11
Variants: Amon_DK.backmapping.sorted - Amon_DK	A	7687	7687	1	324	SNP (transition)	1.2%	4
Variants: Amon_DK.backmapping.sorted - Amon_DK		9837	9837	1	89	Deletion (tandem repeat)	10.1%	9
Variants: Amon_DK.backmapping.sorted - Amon_DK	A	9838	9837	0	84	Insertion	4.8%	4
Variants: Amon_DK.backmapping.sorted - Amon_DK	T	10171	10171	1	429	SNP (transversion)	3.7%	16
Variants: Amon_DK.backmapping.sorted - Amon_DK	G	10762	10762	1	442	SNP (transition)	1.4%	6
Variants: Amon_DK.backmapping.sorted - Amon_DK	G	11794	11794	1	569	SNP (transition)	1.1%	6
Variants: Amon_DK.backmapping.sorted - Amon_DK		12943	12943	1	250	Deletion (tandem repeat)	26.0%	65
Variants: Amon_DK.backmapping.sorted - Amon_DK	T	12943	12942	0	250	Insertion (tandem repeat)	5.2%	13
Variants: Amon_DK.backmapping.sorted - Amon_DK	T	12957	12957	1	274	SNP (transversion)	9.1%	25
Variants: Amon_DK.backmapping.sorted - Amon_DK	C	13254	13254	1	433	SNP (transition)	1.2%	5
Variants: Amon_DK.backmapping.sorted - Amon_DK		13630	13630	1	268	Deletion (tandem repeat)	14.2%	38
Variants: Amon_DK.backmapping.sorted - Amon_DK	A	13630	13629	0	265	Insertion (tandem repeat)	1.9%	5
Variants: Amon_DK.backmapping.sorted - Amon_DK	C	14024	14024	1	320	SNP (transition)	1.3%	4
Variants: Amon_DK.backmapping.sorted - Amon_DK	A	14482	14482	1	321	SNP (transition)	1.2%	4
Variants: Amon_DK.backmapping.sorted - Amon_DK	C	14919	14919	1	299	SNP (transition)	1.3%	4
Variants: Amon_DK.backmapping.sorted - Amon_DK	C	15546	15546	1	302	SNP (transition)	1.3%	4
Variants: Amon_DK.backmapping.sorted - Amon_DK	C	15726	15726	1	292	SNP (transition)	1.4%	4
Variants: Amon_DK.backmapping.sorted - Amon_DK		16899	16899	1	264	Deletion (tandem repeat)	1.9%	5
Variants: Amon_DK.backmapping.sorted - Amon_DK	T	16907	16907	1	275	SNP (transversion)	3.3%	9
Variants: Amon_DK.backmapping.sorted - Amon_DK	T	16908	16908	1	275	SNP (transversion)	7.3%	20
Variants: Amon_DK.backmapping.sorted - Amon_DK	T	17426	17426	1	208	SNP (transition)	1.9%	4
Variants: Amon_DK.backmapping.sorted - Amon_DK	G	17516	17516	1	247	SNP (transition)	1.6%	4
Variants: Amon_DK.backmapping.sorted - Amon_DK		18256	18256	1	187	Deletion (tandem repeat)	8.6%	16
Variants: Amon_DK.backmapping.sorted - Amon_DK	C	18359	18359	1	238	SNP (transition)	1.7%	4
Variants: Amon_DK.backmapping.sorted - Amon_DK		18679	18679	1	160	Deletion (tandem repeat)	24.4%	39
Variants: Amon_DK.backmapping.sorted - Amon_DK	T	18680	18680	1	159	SNP (transversion)	4.4%	7
Variants: Amon_DK.backmapping.sorted - Amon_DK	T	19306	19306	1	286	SNP (transition)	1.4%	4
Variants: Amon_DK.backmapping.sorted - Amon_DK	T	20834	20834	1	255	SNP (transition)	1.6%	4
Variants: Amon_DK.backmapping.sorted - Amon_DK		21143	21143	1	255	Deletion (tandem repeat)	3.1%	8
Variants: Amon_DK.backmapping.sorted - Amon_DK	G	21675	21675	1	231	SNP (transition)	1.7%	4
Variants: Amon_DK.backmapping.sorted - Amon_DK	C	21691	21691	1	232	SNP (transition)	1.7%	4
Variants: Amon_DK.backmapping.sorted - Amon_DK	G	21825	21825	1	239	SNP (transversion)	2.9%	7
Variants: Amon_DK.backmapping.sorted - Amon_DK	A	21875	21875	1	235	SNP (transition)	2.6%	6
Variants: Amon_DK.backmapping.sorted - Amon_DK	G	22619	22619	1	290	SNP (transition)	1.4%	4
Variants: Amon_DK.backmapping.sorted - Amon_DK	C	23143	23143	1	228	SNP (transition)	3.1%	7
Variants: Amon_DK.backmapping.sorted - Amon_DK	A	23167	23167	1	204	SNP (transversion)	7.4%	15
Variants: Amon_DK.backmapping.sorted - Amon_DK		23168	23168	1	205	Deletion (tandem repeat)	2.9%	6
Variants: Amon_DK.backmapping.sorted - Amon_DK	T	24198	24198	1	275	SNP (transversion)	1.5%	4
Variants: Amon_DK.backmapping.sorted - Amon_DK	C	24960	24960	1	305	SNP (transition)	1.3%	4
Variants: Amon_DK.backmapping.sorted - Amon_DK		25242	25242	1	193	Deletion (tandem repeat)	22.8%	44
Variants: Amon_DK.backmapping.sorted - Amon_DK	T	25242	25241	0	191	Insertion (tandem repeat)	4.7%	9
Variants: Amon_DK.backmapping.sorted - Amon_DK	T	25256	25256	1	188	SNP (transversion)	9.0%	17
Variants: Amon_DK.backmapping.sorted - Amon_DK	A	25283	25283	1	203	SNP (transversion)	13.3%	27
Variants: Amon_DK.backmapping.sorted - Amon_DK	A	25284	25284	1	207	SNP (transversion)	12.6%	26
Variants: Amon_DK.backmapping.sorted - Amon_DK		25399	25399	1	256	Deletion (tandem repeat)	4.3%	11
Variants: Amon_DK.backmapping.sorted - Amon_DK	G	25402	25402	1	254	SNP (transition)	3.1%	8
Variants: Amon_DK.backmapping.sorted - Amon_DK	T	25621	25621	1	294	SNP (transition)	6.5%	19
Variants: Amon_DK.backmapping.sorted - Amon_DK	C	25695	25695	1	395	SNP (transition)	10.1%	40
Variants: Amon_DK.backmapping.sorted - Amon_DK	G	25776	25776	1	660	SNP (transition)	5.3%	35
Variants: Amon_DK.backmapping.sorted - Amon_DK	G	25788	25788	1	655	SNP (transition)	1.2%	8
Variants: Amon_DK.backmapping.sorted - Amon_DK	T	25809	25809	1	619	SNP (transversion)	8.9%	55
Variants: Amon_DK.backmapping.sorted - Amon_DK	C	25859	25859	1	462	SNP (transversion)	16.2%	75
Variants: Amon_DK.backmapping.sorted - Amon_DK	AA	25860	25861	2	457 -> 459	Substitution	9.2%	42
Variants: Amon_DK.backmapping.sorted - Amon_DK	C	25863	25863	1	459	SNP (transversion)	8.9%	41
Variants: Amon_DK.backmapping.sorted - Amon_DK	G	26099	26099	1	378	SNP (transition)	1.1%	4
Variants: Amon_DK.backmapping.sorted - Amon_DK	G	26225	26225	1	328	SNP (transition)	1.2%	4
Variants: Amon_DK.backmapping.sorted - Amon_DK		26368	26368	1	266	Deletion (tandem repeat)	15.8%	42
Variants: Amon_DK.backmapping.sorted - Amon_DK	T	26379	26379	1	276	SNP (transversion)	8.3%	23
Variants: Amon_DK.backmapping.sorted - Amon_DK	T	26381	26381	1	271	SNP (transversion)	7.4%	20
Variants: Amon_DK.backmapping.sorted - Amon_DK	C	26808	26808	1	278	SNP (transition)	1.4%	4
Variants: Amon_DK.backmapping.sorted - Amon_DK	C	27434	27434	1	315	SNP (transition)	1.3%	4
Variants: Amon_DK.backmapping.sorted - Amon_DK	T	27639	27639	1	353	SNP (transversion)	4.5%	16
Variants: Amon_DK.backmapping.sorted - Amon_DK	T	27896	27896	1	286	SNP (transversion)	2.1%	6
Variants: Amon_DK.backmapping.sorted - Amon_DK	G	27960	27960	1	272	SNP (transition)	1.5%	4
Variants: Amon_DK.backmapping.sorted - Amon_DK	C	28073	28073	1	227	SNP (transition)	1.8%	4
Variants: Amon_DK.backmapping.sorted - Amon_DK		28309	28309	1	126	Deletion (tandem repeat)	15.9%	20
Variants: Amon_DK.backmapping.sorted - Amon_DK	A	28461	28461	1	280	SNP (transition)	3.6%	10
Variants: Amon_DK.backmapping.sorted - Amon_DK	C	28479	28479	1	307	SNP (transversion)	3.3%	10
Variants: Amon_DK.backmapping.sorted - Amon_DK	C	28771	28771	1	317	SNP (transition)	1.3%	4
Variants: Amon_DK.backmapping.sorted - Amon_DK	C	28835	28835	1	339	SNP (transversion)	1.5%	5
Variants: Amon_DK.backmapping.sorted - Amon_DK	G	28841	28841	1	333	SNP (transversion)	1.5%	5
Variants: Amon_DK.backmapping.sorted - Amon_DK	G	28993	28993	1	311	SNP (transition)	1.3%	4
Variants: Amon_DK.backmapping.sorted - Amon_DK	A	29033	29033	1	312	SNP (transition)	1.6%	5
Variants: Amon_DK.backmapping.sorted - Amon_DK	C	29181	29181	1	312	SNP (transition)	1.9%	6
Variants: Amon_DK.backmapping.sorted - Amon_DK	T	29268	29268	1	310	SNP (transition)	2.3%	7
Variants: Amon_DK.backmapping.sorted - Amon_DK	C	29535	29535	1	312	SNP (transition)	1.6%	5
Variants: Amon_DK.backmapping.sorted - Amon_DK	C	29554	29554	1	316	SNP (transition)	2.2%	7
Variants: Amon_DK.backmapping.sorted - Amon_DK	A	29558	29558	1	328	SNP (transition)	1.5%	5
Variants: Amon_DK.backmapping.sorted - Amon_DK	A	29639	29639	1	301	SNP (transition)	2.0%	6
Variants: Amon_DK.backmapping.sorted - Amon_DK	T	29650	29650	1	304	SNP (transversion)	3.9%	12
Variants: Amon_DK.backmapping.sorted - Amon_DK	T	29658	29658	1	299	SNP (transition)	1.7%	5
Variants: Amon_DK.backmapping.sorted - Amon_DK	G	29865	29865	1	234	SNP (transition)	1.7%	4
Variants: Amon_DK.backmapping.sorted - Amon_DK	C	30012	30012	1	259	SNP (transition)	1.5%	4
Variants: Amon_DK.backmapping.sorted - Amon_DK	A	30114	30114	1	250	SNP (transition)	7.6%	19
Variants: Amon_DK.backmapping.sorted - Amon_DK		30115	30115	1	253	Deletion (tandem repeat)	2.8%	7
Variants: Amon_DK.backmapping.sorted - Amon_DK	T	30120	30120	1	249	SNP (transversion)	1.6%	4
Variants: Amon_DK.backmapping.sorted - Amon_DK	C	30374	30374	1	284	SNP (transition)	2.1%	6
Variants: Amon_DK.backmapping.sorted - Amon_DK		30457	30457	1	289	Deletion (tandem repeat)	4.5%	13
Variants: Amon_DK.backmapping.sorted - Amon_DK	A	30717	30717	1	260	SNP (transversion)	3.8%	10
Variants: Amon_DK.backmapping.sorted - Amon_DK	G	30819	30819	1	274	SNP (transition)	2.6%	7
Variants: Amon_DK.backmapping.sorted - Amon_DK		31196	31196	1	232	Deletion (tandem repeat)	11.6%	27
Variants: Amon_DK.backmapping.sorted - Amon_DK	T	31209	31209	1	227	SNP (transition)	7.0%	16
Variants: Amon_DK.backmapping.sorted - Amon_DK	G	31472	31472	1	258	SNP (transition)	2.3%	6
Variants: Amon_DK.backmapping.sorted - Amon_DK	C	32311	32311	1	263	SNP (transition)	1.5%	4
Variants: Amon_DK.backmapping.sorted - Amon_DK	A	32790	32790	1	263	SNP (transition)	1.5%	4
Variants: Amon_DK.backmapping.sorted - Amon_DK	A	32826	32826	1	267	SNP (transition)	2.6%	7
Variants: Amon_DK.backmapping.sorted - Amon_DK	C	32960	32960	1	269	SNP (transition)	1.5%	4
Variants: Amon_DK.backmapping.sorted - Amon_DK	C	32964	32964	1	273	SNP (transition)	1.8%	5
Variants: Amon_DK.backmapping.sorted - Amon_DK	C	33425	33425	1	272	SNP (transversion)	3.7%	10
Variants: Amon_DK.backmapping.sorted - Amon_DK	T	33454	33454	1	276	SNP (transition)	1.4%	4
Variants: Amon_DK.backmapping.sorted - Amon_DK	C	33484	33484	1	284	SNP (transition)	1.4%	4
Variants: Amon_DK.backmapping.sorted - Amon_DK	C	33494	33494	1	284	SNP (transversion)	1.8%	5
Variants: Amon_DK.backmapping.sorted - Amon_DK	T	33570	33570	1	271	SNP (transition)	1.8%	5
Variants: Amon_DK.backmapping.sorted - Amon_DK	T	33582	33582	1	264	SNP (transition)	1.9%	5
Variants: Amon_DK.backmapping.sorted - Amon_DK	T	34505	34505	1	276	SNP (transition)	1.4%	4
Variants: Amon_DK.backmapping.sorted - Amon_DK	C	34507	34507	1	276	SNP (transversion)	1.4%	4
Variants: Amon_DK.backmapping.sorted - Amon_DK		34998	34998	1	107	Deletion (tandem repeat)	11.2%	12
Variants: Amon_DK.backmapping.sorted - Amon_DK	A	36254	36254	1	202	SNP (transversion)	6.4%	13
Variants: Amon_DK.backmapping.sorted - Amon_DK		36304	36304	1	190	Deletion (tandem repeat)	14.2%	27
Variants: Amon_DK.backmapping.sorted - Amon_DK	T	36315	36315	1	196	SNP (transversion)	6.6%	13
Variants: Amon_DK.backmapping.sorted - Amon_DK		36843	36843	1	350	Deletion (tandem repeat)	5.7%	20
Variants: Amon_DK.backmapping.sorted - Amon_DK	C	36861	36861	1	350	SNP (transition)	1.1%	4
Variants: Amon_DK.backmapping.sorted - Amon_DK	G	36929	36929	1	319	SNP (transition)	1.6%	5
Variants: Amon_DK.backmapping.sorted - Amon_DK	A	36932	36932	1	320	SNP (transversion)	1.9%	6
Variants: Amon_DK.backmapping.sorted - Amon_DK	A	36956	36956	1	319	SNP (transversion)	1.9%	6
Variants: Amon_DK.backmapping.sorted - Amon_DK	T	36981	36981	1	277	SNP (transversion)	2.9%	8
Variants: Amon_DK.backmapping.sorted - Amon_DK	A	37062	37062	1	277	SNP (transition)	2.5%	7
Variants: Amon_DK.backmapping.sorted - Amon_DK	T	37251	37251	1	353	SNP (transition)	1.1%	4
Variants: Amon_DK.backmapping.sorted - Amon_DK	G	37853	37853	1	364	SNP (transition)	1.6%	6
Variants: Amon_DK.backmapping.sorted - Amon_DK	G	38083	38083	1	378	SNP (transition)	1.1%	4
Variants: Amon_DK.backmapping.sorted - Amon_DK	C	38513	38513	1	347	SNP (transition)	1.7%	6
Variants: Amon_DK.backmapping.sorted - Amon_DK	C	38548	38548	1	328	SNP (transversion)	1.5%	5
Variants: Amon_DK.backmapping.sorted - Amon_DK	A	38682	38682	1	351	SNP (transition)	2.0%	7
Variants: Amon_DK.backmapping.sorted - Amon_DK	C	38966	38966	1	367	SNP (transition)	1.1%	4
Variants: Amon_DK.backmapping.sorted - Amon_DK	A	39320	39320	1	384	SNP (transversion)	1.8%	7
Variants: Amon_DK.backmapping.sorted - Amon_DK	AA	40924	40925	2	392 -> 395	Substitution	1.5%	6
Variants: Amon_DK.backmapping.sorted - Amon_DK	C	41375	41375	1	353	SNP (transversion)	1.1%	4
Variants: Amon_DK.backmapping.sorted - Amon_DK	T	41394	41394	1	354	SNP (transition)	1.7%	6
Variants: Amon_DK.backmapping.sorted - Amon_DK	C	41607	41607	1	411	SNP (transition)	1.5%	6
Variants: Amon_DK.backmapping.sorted - Amon_DK	A	41925	41925	1	246	SNP (transversion)	2.0%	5
Variants: Amon_DK.backmapping.sorted - Amon_DK		41933	41933	1	213	Deletion (tandem repeat)	15.5%	33
Variants: Amon_DK.backmapping.sorted - Amon_DK	T	41933	41932	0	212	Insertion (tandem repeat)	7.5%	16
Variants: Amon_DK.backmapping.sorted - Amon_DK		41934	41934	1	216	Deletion (tandem repeat)	6.0%	13
Variants: Amon_DK.backmapping.sorted - Amon_DK	T	41945	41945	1	236	SNP (transversion)	8.5%	20
Variants: Amon_DK.backmapping.sorted - Amon_DK	G	43270	43270	1	331	SNP (transition)	1.2%	4
Variants: Amon_DK.backmapping.sorted - Amon_DK	C	43519	43519	1	393	SNP (transition)	1.3%	5
Variants: Amon_DK.backmapping.sorted - Amon_DK	T	43732	43732	1	374	SNP (transversion)	1.3%	5
Variants: Amon_DK.backmapping.sorted - Amon_DK		44024	44024	1	300	Deletion (tandem repeat)	3.7%	11
Variants: Amon_DK.backmapping.sorted - Amon_DK	T	44271	44271	1	214	SNP (transversion)	3.3%	7
Variants: Amon_DK.backmapping.sorted - Amon_DK	G	44502	44502	1	339	SNP (transition)	1.2%	4
Variants: Amon_DK.backmapping.sorted - Amon_DK	C	44777	44777	1	293	SNP (transition)	1.4%	4
Variants: Amon_DK.backmapping.sorted - Amon_DK	C	45023	45023	1	317	SNP (transition)	1.3%	4
Variants: Amon_DK.backmapping.sorted - Amon_DK		45450	45450	1	252	Deletion (tandem repeat)	4.0%	10
Variants: Amon_DK.backmapping.sorted - Amon_DK	A	45909	45909	1	208	SNP (transversion)	1.9%	4
Variants: Amon_DK.backmapping.sorted - Amon_DK	G	46200	46200	1	272	SNP (transition)	2.2%	6
Variants: Amon_DK.backmapping.sorted - Amon_DK	G	46260	46260	1	312	SNP (transition)	1.3%	4
Variants: Amon_DK.backmapping.sorted - Amon_DK	G	46413	46413	1	260	SNP (transition)	1.5%	4
Variants: Amon_DK.backmapping.sorted - Amon_DK	A	46729	46729	1	170	SNP (transversion)	15.9%	27
Variants: Amon_DK.backmapping.sorted - Amon_DK	A	46731	46731	1	171	SNP (transversion)	10.5%	18
Variants: Amon_DK.backmapping.sorted - Amon_DK		46732	46732	1	170	Deletion (tandem repeat)	20.0%	34
Variants: Amon_DK.backmapping.sorted - Amon_DK	A	46732	46731	0	170	Insertion (tandem repeat)	4.7%	8
Variants: Amon_DK.backmapping.sorted - Amon_DK	G	47382	47382	1	260	SNP (transition)	1.5%	4
Variants: Amon_DK.backmapping.sorted - Amon_DK	C	47817	47817	1	265	SNP (transition)	3.8%	10
Variants: Amon_DK.backmapping.sorted - Amon_DK	T	49566	49566	1	211	SNP (transversion)	4.3%	9
Variants: Amon_DK.backmapping.sorted - Amon_DK	A	49600	49600	1	227	SNP (transversion)	1.8%	4
Variants: Amon_DK.backmapping.sorted - Amon_DK	G	49605	49605	1	235	SNP (transition)	3.0%	7
Variants: Amon_DK.backmapping.sorted - Amon_DK	A	49752	49752	1	233	SNP (transversion)	3.0%	7
Variants: Amon_DK.backmapping.sorted - Amon_DK	A	50101	50101	1	231	SNP (transition)	1.7%	4
Variants: Amon_DK.backmapping.sorted - Amon_DK	CA	50171	50172	2	185 -> 186	Substitution	2.7%	5
Variants: Amon_DK.backmapping.sorted - Amon_DK		50277	50277	1	96	Deletion (tandem repeat)	15.6%	15
Variants: Amon_DK.backmapping.sorted - Amon_DK	T	50277	50276	0	96	Insertion (tandem repeat)	7.3%	7
Variants: Amon_DK.backmapping.sorted - Amon_DK	T	50295	50295	1	84	SNP (transition)	13.1%	11
Variants: Amon_DK.backmapping.sorted - Amon_DK	C	50565	50565	1	272	SNP (transition)	1.5%	4
Variants: Amon_DK.backmapping.sorted - Amon_DK	C	50653	50653	1	237	SNP (transversion)	1.7%	4
Variants: Amon_DK.backmapping.sorted - Amon_DK	T	50655	50655	1	239	SNP (transition)	1.7%	4
Variants: Amon_DK.backmapping.sorted - Amon_DK	A	50923	50923	1	224	SNP (transversion)	5.4%	12
Variants: Amon_DK.backmapping.sorted - Amon_DK	A	50924	50924	1	230	SNP (transversion)	3.9%	9
Variants: Amon_DK.backmapping.sorted - Amon_DK	G	51351	51351	1	240	SNP (transversion)	1.7%	4
Variants: Amon_DK.backmapping.sorted - Amon_DK	T	51739	51739	1	207	SNP (transition)	2.4%	5
Variants: Amon_DK.backmapping.sorted - Amon_DK	G	51780	51780	1	195	SNP (transition)	2.1%	4
Variants: Amon_DK.backmapping.sorted - Amon_DK	C	52236	52236	1	227	SNP (transversion)	1.8%	4
Variants: Amon_DK.backmapping.sorted - Amon_DK	G	52629	52629	1	282	SNP (transition)	1.4%	4
Variants: Amon_DK.backmapping.sorted - Amon_DK	T	52649	52649	1	264	SNP (transversion)	1.5%	4
Variants: Amon_DK.backmapping.sorted - Amon_DK	T	54056	54056	1	219	SNP (transversion)	1.8%	4
Variants: Amon_DK.backmapping.sorted - Amon_DK	T	54122	54122	1	210	SNP (transversion)	3.8%	8
Variants: Amon_DK.backmapping.sorted - Amon_DK		54544	54544	1	150	Deletion (tandem repeat)	17.3%	26
Variants: Amon_DK.backmapping.sorted - Amon_DK	T	54544	54543	0	150	Insertion (tandem repeat)	6.7%	10
Variants: Amon_DK.backmapping.sorted - Amon_DK	T	54555	54555	1	152	SNP (transversion)	7.2%	11
Variants: Amon_DK.backmapping.sorted - Amon_DK		54682	54682	1	169	Deletion (tandem repeat)	12.4%	21
Variants: Amon_DK.backmapping.sorted - Amon_DK	G	55002	55002	1	205	SNP (transition)	3.9%	8
Variants: Amon_DK.backmapping.sorted - Amon_DK	G	55324	55324	1	246	SNP (transition)	1.6%	4
Variants: Amon_DK.backmapping.sorted - Amon_DK	A	56794	56794	1	240	SNP (transition)	2.5%	6
Variants: Amon_DK.backmapping.sorted - Amon_DK	G	57017	57017	1	221	SNP (transition)	1.8%	4
Variants: Amon_DK.backmapping.sorted - Amon_DK	A	57885	57885	1	172	SNP (transition)	2.3%	4
Variants: Amon_DK.backmapping.sorted - Amon_DK	T	57915	57915	1	203	SNP (transition)	2.0%	4
Variants: Amon_DK.backmapping.sorted - Amon_DK	T	58100	58100	1	252	SNP (transition)	1.6%	4
Variants: Amon_DK.backmapping.sorted - Amon_DK	T	58445	58445	1	164	SNP (transversion)	5.5%	9
Variants: Amon_DK.backmapping.sorted - Amon_DK	A	58523	58523	1	140	SNP (transition)	4.3%	6
Variants: Amon_DK.backmapping.sorted - Amon_DK	A	58581	58581	1	109	SNP (transition)	13.8%	15
Variants: Amon_DK.backmapping.sorted - Amon_DK		58582	58582	1	110	Deletion (tandem repeat)	9.1%	10
Variants: Amon_DK.backmapping.sorted - Amon_DK	A	58582	58581	0	108	Insertion (tandem repeat)	4.6%	5
Variants: Amon_DK.backmapping.sorted - Amon_DK	A	59189	59189	1	140	SNP (transversion)	10.0%	14
Variants: Amon_DK.backmapping.sorted - Amon_DK		59235	59235	1	126	Deletion (tandem repeat)	12.7%	16
Variants: Amon_DK.backmapping.sorted - Amon_DK	T	59235	59234	0	124	Insertion (tandem repeat)	3.2%	4
Variants: Amon_DK.backmapping.sorted - Amon_DK	C	60043	60043	1	189	SNP (transversion)	2.1%	4
Variants: Amon_DK.backmapping.sorted - Amon_DK	GT	60957	60958	2	177 -> 178	Substitution	4.5%	8
Variants: Amon_DK.backmapping.sorted - Amon_DK	T	61300	61300	1	194	SNP (transition)	3.1%	6
Variants: Amon_DK.backmapping.sorted - Amon_DK	T	61334	61334	1	217	SNP (transition)	2.3%	5
Variants: Amon_DK.backmapping.sorted - Amon_DK	C	61699	61699	1	202	SNP (transversion)	3.0%	6
Variants: Amon_DK.backmapping.sorted - Amon_DK	T	62276	62276	1	167	SNP (transversion)	3.0%	5
Variants: Amon_DK.backmapping.sorted - Amon_DK	T	62319	62319	1	159	SNP (transversion)	3.1%	5
Variants: Amon_DK.backmapping.sorted - Amon_DK		62328	62328	1	166	Deletion (tandem repeat)	3.6%	6
Variants: Amon_DK.backmapping.sorted - Amon_DK	G	62431	62431	1	200	SNP (transversion)	4.0%	8
Variants: Amon_DK.backmapping.sorted - Amon_DK	G	62459	62459	1	201	SNP (transition)	3.0%	6
Variants: Amon_DK.backmapping.sorted - Amon_DK	G	62460	62460	1	201	SNP (transition)	4.5%	9
Variants: Amon_DK.backmapping.sorted - Amon_DK	A	62464	62464	1	198	SNP (transition)	4.5%	9
Variants: Amon_DK.backmapping.sorted - Amon_DK	G	62473	62473	1	183	SNP (transversion)	4.4%	8
Variants: Amon_DK.backmapping.sorted - Amon_DK		63064	63064	1	114	Deletion (tandem repeat)	14.0%	16
Variants: Amon_DK.backmapping.sorted - Amon_DK	T	63064	63063	0	113	Insertion (tandem repeat)	4.4%	5
Variants: Amon_DK.backmapping.sorted - Amon_DK	T	63836	63836	1	205	SNP (transition)	2.9%	6
Variants: Amon_DK.backmapping.sorted - Amon_DK	T	63861	63861	1	193	SNP (transversion)	3.1%	6
Variants: Amon_DK.backmapping.sorted - Amon_DK	A	63924	63924	1	161	SNP (transversion)	5.0%	8
Variants: Amon_DK.backmapping.sorted - Amon_DK	G	64091	64091	1	169	SNP (transition)	2.4%	4
Variants: Amon_DK.backmapping.sorted - Amon_DK	A	64818	64818	1	205	SNP (transversion)	5.4%	11
Variants: Amon_DK.backmapping.sorted - Amon_DK	A	65182	65182	1	124	SNP (transversion)	6.5%	8
Variants: Amon_DK.backmapping.sorted - Amon_DK		65184	65184	1	123	Deletion (tandem repeat)	23.6%	29
Variants: Amon_DK.backmapping.sorted - Amon_DK		65185	65186	2	124 -> 126	Deletion (tandem repeat)	7.9% -> 8.1%	10
Variants: Amon_DK.backmapping.sorted - Amon_DK	T	65196	65196	1	127	SNP (transition)	14.2%	18
Variants: Amon_DK.backmapping.sorted - Amon_DK	T	65197	65197	1	126	SNP (transversion)	14.3%	18
Variants: Amon_DK.backmapping.sorted - Amon_DK	A	65205	65205	1	130	SNP (transition)	4.6%	6
Variants: Amon_DK.backmapping.sorted - Amon_DK	A	65307	65307	1	142	SNP (transition)	4.2%	6
Variants: Amon_DK.backmapping.sorted - Amon_DK		65338	65338	1	141	Deletion (tandem repeat)	9.9%	14
Variants: Amon_DK.backmapping.sorted - Amon_DK	T	65602	65602	1	166	SNP (transition)	2.4%	4
Variants: Amon_DK.backmapping.sorted - Amon_DK	A	65747	65747	1	197	SNP (transition)	2.5%	5
Variants: Amon_DK.backmapping.sorted - Amon_DK	A	66166	66166	1	193	SNP (transversion)	2.1%	4
Variants: Amon_DK.backmapping.sorted - Amon_DK	T	66445	66445	1	199	SNP (transversion)	2.5%	5
Variants: Amon_DK.backmapping.sorted - Amon_DK	T	66575	66575	1	166	SNP (transition)	2.4%	4
Variants: Amon_DK.backmapping.sorted - Amon_DK	C	66601	66601	1	154	SNP (transition)	5.8%	9
Variants: Amon_DK.backmapping.sorted - Amon_DK	T	67113	67113	1	201	SNP (transversion)	5.5%	11
Variants: Amon_DK.backmapping.sorted - Amon_DK	A	67153	67153	1	206	SNP (transition)	2.4%	5
Variants: Amon_DK.backmapping.sorted - Amon_DK	A	67198	67198	1	194	SNP (transversion)	3.6%	7
Variants: Amon_DK.backmapping.sorted - Amon_DK	A	67201	67201	1	194	SNP (transversion)	3.1%	6
Variants: Amon_DK.backmapping.sorted - Amon_DK		67638	67639	2	115 -> 116	Deletion (tandem repeat)	6.0% -> 6.1%	7
Variants: Amon_DK.backmapping.sorted - Amon_DK	TA	67638	67637	0	115	Insertion (tandem repeat)	3.5%	4
Variants: Amon_DK.backmapping.sorted - Amon_DK	T	68789	68789	1	192	SNP (transition)	3.6%	7
Variants: Amon_DK.backmapping.sorted - Amon_DK	T	68801	68801	1	194	SNP (transversion)	4.6%	9
Variants: Amon_DK.backmapping.sorted - Amon_DK	C	69247	69247	1	199	SNP (transition)	2.0%	4
Variants: Amon_DK.backmapping.sorted - Amon_DK	G	69426	69426	1	235	SNP (transition)	1.7%	4
Variants: Amon_DK.backmapping.sorted - Amon_DK	G	70037	70037	1	190	SNP (transition)	2.1%	4
Variants: Amon_DK.backmapping.sorted - Amon_DK	G	70163	70163	1	135	SNP (transition)	3.0%	4
Variants: Amon_DK.backmapping.sorted - Amon_DK		70312	70312	1	120	Deletion (tandem repeat)	13.3%	16
Variants: Amon_DK.backmapping.sorted - Amon_DK	T	70312	70311	0	120	Insertion (tandem repeat)	4.2%	5
Variants: Amon_DK.backmapping.sorted - Amon_DK	T	70324	70324	1	132	SNP (transversion)	12.9%	17
Variants: Amon_DK.backmapping.sorted - Amon_DK	C	70470	70470	1	229	SNP (transition)	1.7%	4
Variants: Amon_DK.backmapping.sorted - Amon_DK	T	70590	70590	1	164	SNP (transition)	2.4%	4
Variants: Amon_DK.backmapping.sorted - Amon_DK	A	70675	70675	1	196	SNP (transversion)	2.6%	5
Variants: Amon_DK.backmapping.sorted - Amon_DK	A	70686	70686	1	186	SNP (transition)	2.2%	4
Variants: Amon_DK.backmapping.sorted - Amon_DK	A	70921	70921	1	156	SNP (transversion)	18.6%	29
Variants: Amon_DK.backmapping.sorted - Amon_DK		70922	70922	1	155	Deletion (tandem repeat)	18.7%	29
Variants: Amon_DK.backmapping.sorted - Amon_DK		71275	71275	1	131	Deletion (tandem repeat)	19.8%	26
Variants: Amon_DK.backmapping.sorted - Amon_DK	C	71285	71285	1	127	SNP (transition)	4.7%	6
Variants: Amon_DK.backmapping.sorted - Amon_DK		71432	71432	1	162	Deletion (tandem repeat)	3.7%	6
Variants: Amon_DK.backmapping.sorted - Amon_DK	G	71629	71629	1	260	SNP (transversion)	2.3%	6
Variants: Amon_DK.backmapping.sorted - Amon_DK	A	71674	71674	1	259	SNP (transition)	2.7%	7
Variants: Amon_DK.backmapping.sorted - Amon_DK	A	72585	72585	1	266	SNP (transversion)	1.5%	4
Variants: Amon_DK.backmapping.sorted - Amon_DK	A	72996	72996	1	264	SNP (transversion)	3.0%	8
Variants: Amon_DK.backmapping.sorted - Amon_DK	T	73281	73281	1	217	SNP (transition)	1.8%	4
Variants: Amon_DK.backmapping.sorted - Amon_DK	G	73752	73752	1	217	SNP (transversion)	3.2%	7
Variants: Amon_DK.backmapping.sorted - Amon_DK		73797	73797	1	225	Deletion (tandem repeat)	2.2%	5
Variants: Amon_DK.backmapping.sorted - Amon_DK	T	73805	73805	1	228	SNP (transversion)	5.3%	12
Variants: Amon_DK.backmapping.sorted - Amon_DK	T	74183	74183	1	238	SNP (transition)	1.7%	4
Variants: Amon_DK.backmapping.sorted - Amon_DK	A	74258	74258	1	268	SNP (transition)	1.5%	4
Variants: Amon_DK.backmapping.sorted - Amon_DK	C	74266	74266	1	268	SNP (transition)	2.2%	6
Variants: Amon_DK.backmapping.sorted - Amon_DK	A	75124	75124	1	309	SNP (transversion)	3.9%	12
Variants: Amon_DK.backmapping.sorted - Amon_DK	G	75142	75142	1	297	SNP (transition)	1.7%	5
Variants: Amon_DK.backmapping.sorted - Amon_DK	G	75249	75249	1	240	SNP (transition)	1.7%	4
Variants: Amon_DK.backmapping.sorted - Amon_DK	T	75469	75469	1	267	SNP (transition)	1.9%	5
Variants: Amon_DK.backmapping.sorted - Amon_DK	C	75494	75494	1	248	SNP (transition)	1.6%	4
Variants: Amon_DK.backmapping.sorted - Amon_DK	T	75975	75975	1	315	SNP (transition)	1.9%	6
Variants: Amon_DK.backmapping.sorted - Amon_DK	T	75992	75992	1	321	SNP (transversion)	2.5%	8
Variants: Amon_DK.backmapping.sorted - Amon_DK	T	76003	76003	1	325	SNP (transition)	3.1%	10
Variants: Amon_DK.backmapping.sorted - Amon_DK	C	76302	76302	1	300	SNP (transition)	1.7%	5
Variants: Amon_DK.backmapping.sorted - Amon_DK	G	76770	76770	1	293	SNP (transition)	2.7%	8
Variants: Amon_DK.backmapping.sorted - Amon_DK	A	76783	76783	1	295	SNP (transversion)	3.4%	10
Variants: Amon_DK.backmapping.sorted - Amon_DK	C	77077	77077	1	278	SNP (transition)	1.4%	4
Variants: Amon_DK.backmapping.sorted - Amon_DK	G	77471	77471	1	291	SNP (transition)	1.4%	4
Variants: Amon_DK.backmapping.sorted - Amon_DK	G	77478	77478	1	292	SNP (transition)	1.4%	4
Variants: Amon_DK.backmapping.sorted - Amon_DK		77864	77864	1	270	Deletion (tandem repeat)	8.9%	24
Variants: Amon_DK.backmapping.sorted - Amon_DK	T	77864	77863	0	267	Insertion (tandem repeat)	4.1%	11
Variants: Amon_DK.backmapping.sorted - Amon_DK	T	77874	77874	1	276	SNP (transversion)	6.5%	18
Variants: Amon_DK.backmapping.sorted - Amon_DK	T	77881	77881	1	266	SNP (transversion)	7.5%	20
Variants: Amon_DK.backmapping.sorted - Amon_DK	G	77977	77977	1	332	SNP (transition)	1.2%	4
Variants: Amon_DK.backmapping.sorted - Amon_DK	C	77996	77996	1	365	SNP (transition)	2.2%	8
Variants: Amon_DK.backmapping.sorted - Amon_DK	G	77998	77998	1	362	SNP (transition)	2.2%	8
Variants: Amon_DK.backmapping.sorted - Amon_DK	C	78157	78157	1	367	SNP (transition)	1.6%	6
Variants: Amon_DK.backmapping.sorted - Amon_DK	T	78521	78521	1	316	SNP (transition)	1.3%	4
Variants: Amon_DK.backmapping.sorted - Amon_DK	C	79280	79280	1	384	SNP (transversion)	1.0%	4
Variants: Amon_DK.backmapping.sorted - Amon_DK	A	79398	79398	1	330	SNP (transversion)	1.8%	6
Variants: Amon_DK.backmapping.sorted - Amon_DK	T	79453	79453	1	344	SNP (transition)	2.0%	7
Variants: Amon_DK.backmapping.sorted - Amon_DK	T	79704	79704	1	318	SNP (transition)	3.5%	11
Variants: Amon_DK.backmapping.sorted - Amon_DK	A	79795	79795	1	296	SNP (transversion)	5.1%	15
Variants: Amon_DK.backmapping.sorted - Amon_DK		80300	80300	1	292	Deletion (tandem repeat)	5.5%	16
Variants: Amon_DK.backmapping.sorted - Amon_DK	G	80393	80393	1	314	SNP (transversion)	2.2%	7
Variants: Amon_DK.backmapping.sorted - Amon_DK	C	80562	80562	1	283	SNP (transition)	1.8%	5
Variants: Amon_DK.backmapping.sorted - Amon_DK	G	80779	80779	1	306	SNP (transition)	1.3%	4
Variants: Amon_DK.backmapping.sorted - Amon_DK	G	80787	80787	1	299	SNP (transition)	2.0%	6
Variants: Amon_DK.backmapping.sorted - Amon_DK	A	80841	80841	1	278	SNP (transversion)	4.0%	11
Variants: Amon_DK.backmapping.sorted - Amon_DK	C	81269	81269	1	250	SNP (transition)	2.8%	7
Variants: Amon_DK.backmapping.sorted - Amon_DK	C	81497	81497	1	228	SNP (transition)	2.2%	5
Variants: Amon_DK.backmapping.sorted - Amon_DK	G	81847	81847	1	278	SNP (transition)	1.4%	4
Variants: Amon_DK.backmapping.sorted - Amon_DK	A	81873	81873	1	287	SNP (transition)	1.4%	4
Variants: Amon_DK.backmapping.sorted - Amon_DK	T	81894	81894	1	293	SNP (transition)	2.7%	8
Variants: Amon_DK.backmapping.sorted - Amon_DK	G	82207	82207	1	288	SNP (transition)	1.4%	4
Variants: Amon_DK.backmapping.sorted - Amon_DK	T	82410	82410	1	229	SNP (transversion)	7.4%	17
Variants: Amon_DK.backmapping.sorted - Amon_DK	T	82413	82413	1	229	SNP (transversion)	10.9%	25
Variants: Amon_DK.backmapping.sorted - Amon_DK	C	82450	82450	1	212	SNP (transition)	2.4%	5
Variants: Amon_DK.backmapping.sorted - Amon_DK	T	82453	82453	1	220	SNP (transversion)	10.0%	22
[truncated: 437 more rows]
